# Supplementary material
Source: Royal Society of Chemistry journal article supplement (doi:10.1039/d6cc00944a)

# Copper Catalyzed Three-Component Thiocyanosulfonylation of Allenenes

## Supporting Information

### Table of Contents

|                                                           |     |
|-----------------------------------------------------------|-----|
| 1. General information.....                               | S2  |
| 2. General procedure for the synthesis of allenenes ..... | S2  |
| 3. General procedure for the synthesis of products.....   | S3  |
| 4. Synthetic applications.....                            | S3  |
| 5. Mechanistic studies.....                               | S4  |
| 5.1 Radical trapping experiment.....                      | S4  |
| 5.2 Control experiment.....                               | S4  |
| 5.3 Cyclic Voltammetry experiments.....                   | S5  |
| 6. Characterization data.....                             | S6  |
| 7. X-ray structure of <b>3a</b> .....                     | S21 |
| 8. References.....                                        | S22 |
| 9. NMR spectra.....                                       | S23 |

## 1. General information.

All commercially available reagents were used without further purification. Column chromatography was performed on silica gel (200-300 mesh).  $^1\text{H}$  NMR (400 MHz),  $^{13}\text{C}$  NMR (100 MHz), and  $^{19}\text{F}$  NMR (376 MHz) spectra were recorded on a 400 MHz NMR spectrometer. Chemical shifts ( $\delta$ ) were reported in ppm, and coupling constants ( $J$ ) were given in Hertz (Hz). Data were reported as s = singlet, d = doublet, t = triplet, q = quartet, dd = doublet of doublets, m = multiplet. High-resolution mass spectra (HRMS) were recorded on a Thermo Scientific Q Exactive ESI (Analyzer: TOF).

## 2. General procedure for the synthesis of Allenes

The substrates **1** was synthesized according to the literature.<sup>1</sup>

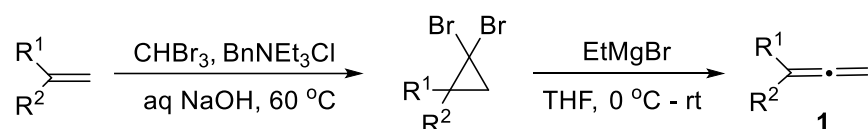

To a solution of alkene (10 mmol), bromoform (15 mmol) and  $\text{BnNEt}_3\text{Cl}$  (0.1 mmol) was added dropwise a solution of 50%  $\text{NaOH}$  (40 mmol), and the mixture was stirred at room temperature for 1 h, then heated to 60  $^\circ\text{C}$  and further stirred until conversion was complete as observed by TLC analysis. Water was added and the aqueous phase was extracted with EA (2  $\times$  50 mL). The combined organic phases were dried over  $\text{Na}_2\text{SO}_4$  and the solvent removed under reduced pressure. The reaction mixture was purified by column chromatography afforded dibromocyclopropane derivatives.

Dibromocyclopropane derivatives (5 mmol) was added in dry THF (5 mL), then the solution cooled to 0  $^\circ\text{C}$ .  $\text{EtMgBr}$  (1.0 M in THF, 7.5 mmol) was added dropwise under nitrogen atmosphere, then the mixture was slowly warmed to room temperature, and stirred at room temperature for 2 hours. Then the reaction was quenched by  $\text{NH}_4\text{Cl}$  solution, and the mixture extracted with EA (2  $\times$  50 mL). The combined organic layers were washed with brine, dried with anhydrous  $\text{Na}_2\text{SO}_4$  and filtered. After removing the solvent under reduced pressure, the crude product was purified by column chromatography on silica gel to afford allenes **1**.

### 3. General procedure for the synthesis of products

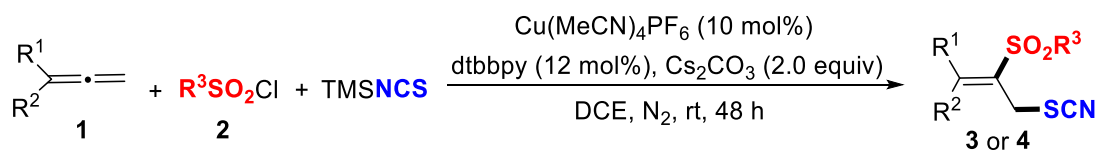

To a reaction tube were added **1** (0.20 mmol), **2** (0.24 mmol), TMSNCS (52.5 mg, 0.40 mmol), Cu(CH<sub>3</sub>CN)<sub>4</sub>PF<sub>6</sub> (7.5 mg, 10 mol%), dtbbpy (6.5 mg, 12 mol%), Cs<sub>2</sub>CO<sub>3</sub> (130.3 mg, 0.40 mmol), and DCE (2.0 mL). The solution was degassed and finally backfilled with nitrogen. Then the reaction mixture was stirred at room temperature under nitrogen atmosphere for 48 h. After completion of the reaction, the mixture was concentrated in vacuo. The residue was purified by column chromatography on silica gel to give products **3** or **4**.

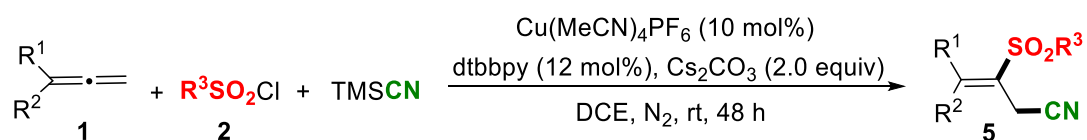

To a reaction tube were added **1** (0.20 mmol), **2** (0.24 mmol), TMSCN (39.7 mg, 0.40 mmol), Cu(CH<sub>3</sub>CN)<sub>4</sub>PF<sub>6</sub> (7.5 mg, 10 mol%), dtbbpy (6.5 mg, 12 mol%), Cs<sub>2</sub>CO<sub>3</sub> (130.3 mg, 0.40 mmol), and DCE (2.0 mL). The solution was degassed and finally backfilled with nitrogen. Then the reaction mixture was stirred at room temperature under nitrogen atmosphere for 48 h. After completion of the reaction, the mixture was concentrated in vacuo. The residue was purified by column chromatography on silica gel to give products **5**.

### 4. Synthetic applications

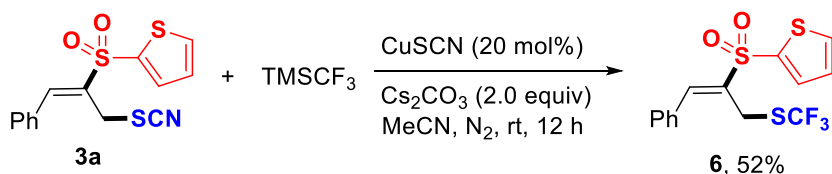

To a reaction tube were added **3a** (0.20 mmol), TMSCF<sub>3</sub> (0.40 mmol), CuSCN (20 mol%), Cs<sub>2</sub>CO<sub>3</sub> (0.40 mmol), and MeCN (2.0 mL). The solution was degassed and finally backfilled with nitrogen. Then the reaction mixture was stirred at room temperature for 12 h. After completion of the reaction, the mixture was concentrated

in vacuo. The residue was purified by column chromatography on silica gel to give product **6**.

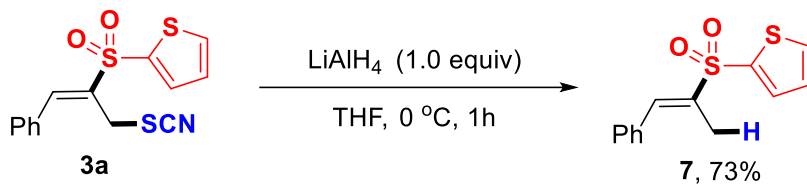

To a reaction tube were added **3a** (0.20 mmol) and THF (2.0 mL). Then the solution was cooled to  $0\text{ }^\circ\text{C}$ , and the  $\text{LiAlH}_4$  (0.20 mmol) was added. The reaction mixture was stirred for 1 h. After completion of the reaction, the mixture was quenched with water, extracted with ethyl acetate (EA), and dried over sodium sulfate. The mixture was concentrated in vacuo and the residue was purified by column chromatography on silica gel to give product **7**.

## 5. Mechanistic studies

### 5.1 Radical trapping experiment

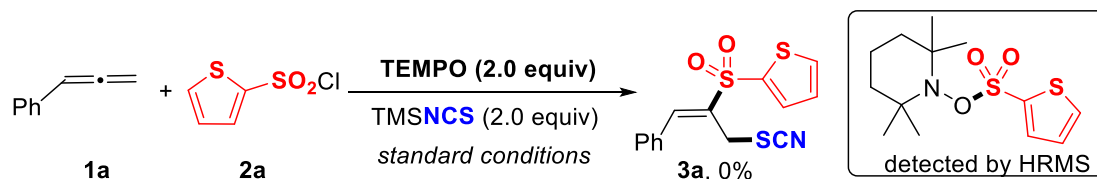

To a reaction tube were added **1a** (23.2 mg, 0.20 mmol), and **2a** (43.6 mg, 0.24 mmol), TMSNCS (52.5 mg, 0.40 mmol), TEMPO (93.8 mg, 0.60 mmol),  $\text{Cu}(\text{CH}_3\text{CN})_4\text{PF}_6$  (7.4 mg, 10 mol%), dtbbpy (6.5 mg, 12 mol%),  $\text{Cs}_2\text{CO}_3$  (130.3 mg, 0.40 mmol), and DCE (2.0 mL). The mixture was degassed and finally backfilled with nitrogen. The reaction mixture was stirred at room temperature under nitrogen atmosphere for 48 h. The  $^{19}\text{F}$  NMR analysis indicated that the formation of product **3a** was not detected and the sulfonyl radical adduct was detected through high-resolution mass spectrometry (HRMS). HRMS (ESI)  $m/z$ :  $[\text{M} + \text{H}]^+$  calcd for  $\text{C}_{13}\text{H}_{22}\text{NO}_3\text{S}_2$  304.1036, found 304.1033.

### 5.2 Control experiment

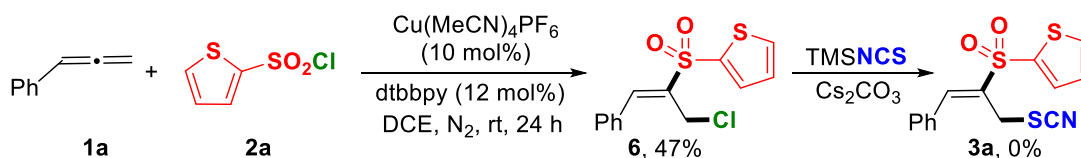

To a reaction tube were added **1a** (46.4 mg, 0.40 mmol), **2a** (87.6 mg, 0.48 mmol), Cu(MeCN)<sub>4</sub>PF<sub>6</sub> (14.8 mg, 10 mol%), dtbbpy (12.8 mg, 12 mol%), and DCE (4.0 mL). The mixture was degassed and finally backfilled with nitrogen. The reaction mixture was stirred at room temperature under nitrogen atmosphere for 24 h. After completion of the reaction, the mixture was concentrated in vacuo. The residue was purified by column chromatography on silica gel to give product **6**. Then **6** (0.20 mmol), TMSNCS (0.40 mmol), Cs<sub>2</sub>CO<sub>3</sub> (0.40 mmol), and DCE (2.0 mL) were added to a reaction tube. The mixture was stirred at room temperature under nitrogen atmosphere for 24 h. **3a** was not detected by TLC.

### 5.3 Cyclic Voltammetry experiments

Cyclic Voltammetry was performed on a CHI 660E electrochemical analyzer. CV measurement of starting material (0.001 M) was carried out in 0.1 M of Bu<sub>4</sub>NPF<sub>6</sub>/MeCN at a scan rate of 50 mV/s with the protection of N<sub>2</sub>. The working electrode is a glassy carbon, the counter electrode is a Pt wire, and the reference electrode is Ag/AgCl (3.0 M KCl). As showed in Figure S1, the reduction potentials of RSO<sub>2</sub>Cl (**2a**), LCu [Cu(MeCN)<sub>4</sub>PF<sub>6</sub>+dtbbpy], TMSNCS, and the LCu+TMSNCS complex are as follows: -0.907 V (-0.876 V SCE), -0.979 V (-0.948 V SCE), -0.77 V (-0.739 V SCE), -1.053 V (-1.022 V SCE).

These results confirm that the LCu(I) complex possess sufficient reducing power to activate RSO<sub>2</sub>Cl via single-electron transfer (SET), supporting the proposed mechanism (path a, Figure S2). On the other hand, the results also indicate that the [LCu(I) + TMSNCS] adduct can reduce the RSO<sub>2</sub>Cl, raising the possibility that LCu(I) first binds with TMSNCS to form the adduct, which subsequently undergoes SET with RSO<sub>2</sub>Cl (path b, Figure S2).

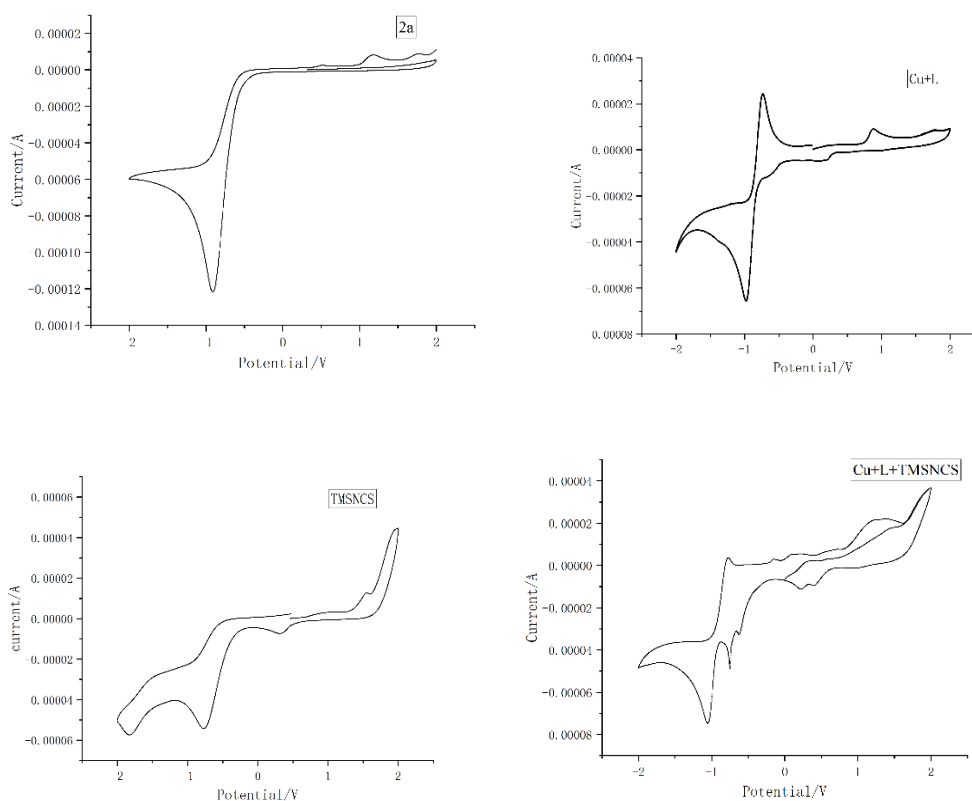

**Figure S1.** Cyclic voltammograms of **2a**, Cu+L, TMSNCS, and Cu+L+TMSNCS

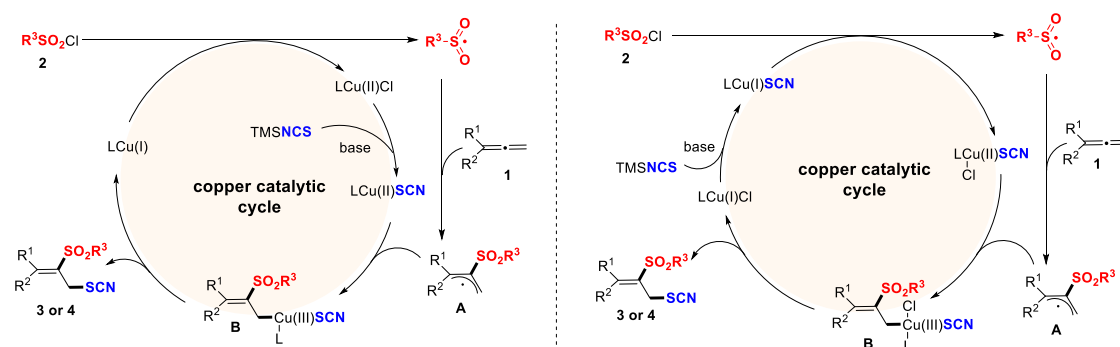

**Figure S2.** Proposed mechanism

## 6. Characterization data

### (E)-2-((1-phenyl-3-thiocyanatoprop-1-en-2-yl)sulfonyl)thiophene (**3a**)

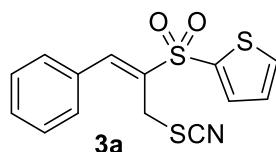

White solid (47.4 mg, 74%); The product is purified with silica gel chromatography

(eluent: petroleum ether/ethyl acetate = 3:1);  $^1\text{H}$  NMR (400 MHz,  $\text{CDCl}_3$ )  $\delta$  8.12 – 8.05 (m, 1H), 7.86 – 7.74 (m, 2H), 7.53 – 7.45 (m, 5H), 7.23 – 7.14 (m, 1H), 4.27 (s, 2H);  $^{13}\text{C}$  NMR (100 MHz,  $\text{CDCl}_3$ )  $\delta$  143.9, 139.8, 135.2, 135.1, 135.0, 131.7, 130.9, 129.5, 129.3, 128.3, 110.9, 30.3; HRMS (ESI)  $m/z$ :  $[\text{M}+\text{H}]^+$  calcd for  $\text{C}_{14}\text{H}_{12}\text{NO}_2\text{S}_3$  322.0025, found 322.0032.

**(E)-2-((1-(4-chlorophenyl)-3-thiocyanatoprop-1-en-2-yl)sulfonyl)thiophene (3b)**

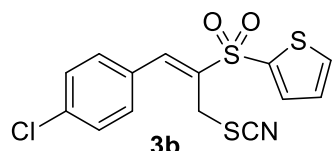

White solid (50.8 mg, 71%); The product is purified with silica gel chromatography (eluent: petroleum ether/ethyl acetate = 3:1);  $^1\text{H}$  NMR (400 MHz,  $\text{CDCl}_3$ )  $\delta$  8.04 (s, 1H), 7.87 – 7.76 (m, 2H), 7.54 – 7.39 (m, 4H), 7.20 (t,  $J = 4.4$  Hz, 1H), 4.24 (s, 2H);  $^{13}\text{C}$  NMR (100 MHz,  $\text{CDCl}_3$ )  $\delta$  142.6, 139.6, 137.3, 135.7, 135.5, 135.3, 130.8, 130.2, 129.7, 128.4, 110.8, 30.2; HRMS (ESI)  $m/z$ :  $[\text{M}+\text{H}]^+$  calcd for  $\text{C}_{14}\text{H}_{11}\text{ClNO}_2\text{S}_3$  355.9635, found 355.9631.

**(E)-2-((1-(3-chlorophenyl)-3-thiocyanatoprop-1-en-2-yl)sulfonyl)thiophene (3c)**

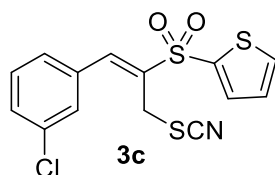

White solid (48.2 mg, 68%); The product is purified with silica gel chromatography (eluent: petroleum ether/ethyl acetate = 3:1);  $^1\text{H}$  NMR (400 MHz,  $\text{CDCl}_3$ )  $\delta$  8.03 (s, 1H), 7.84 – 7.79 (m, 2H), 7.48 – 7.36 (m, 4H), 7.25 – 7.18 (m, 1H), 4.23 (s, 2H);  $^{13}\text{C}$  NMR (100 MHz,  $\text{CDCl}_3$ )  $\delta$  142.3, 139.3, 136.8, 135.6, 135.4, 135.2, 133.4, 130.8, 130.5, 129.3, 128.4, 127.2, 110.6, 29.9; HRMS (ESI)  $m/z$ :  $[\text{M}+\text{H}]^+$  calcd for  $\text{C}_{14}\text{H}_{11}\text{ClNO}_2\text{S}_3$  355.9635, found 355.9651.

**(E)-2-((1-(2-chlorophenyl)-3-thiocyanatoprop-1-en-2-yl)sulfonyl)thiophene (3d)**

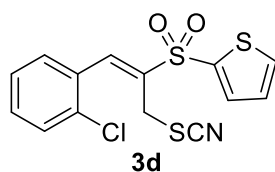

White solid (51.4 mg, 72%); The product is purified with silica gel chromatography (eluent: petroleum ether/ethyl acetate = 3:1);  $^1\text{H}$  NMR (400 MHz,  $\text{CDCl}_3$ )  $\delta$  8.20 (s, 1H), 7.87 – 7.78 (m, 2H), 7.51 – 7.37 (m, 4H), 7.23 – 7.18 (m, 1H), 4.08 (s, 2H);  $^{13}\text{C}$  NMR (100 MHz,  $\text{CDCl}_3$ )  $\delta$  141.6, 139.5, 138.4, 135.6, 135.3, 134.4, 131.6, 130.6, 130.2, 129.2, 128.3, 127.4, 110.8, 29.9; HRMS (ESI)  $m/z$ :  $[\text{M}+\text{H}]^+$  calcd for  $\text{C}_{14}\text{H}_{11}\text{ClNO}_2\text{S}_3$  355.9635, found 355.9639.

**(E)-2-((1-(4-bromophenyl)-3-thiocyanatoprop-1-en-2-yl)sulfonyl)thiophene (3e)**

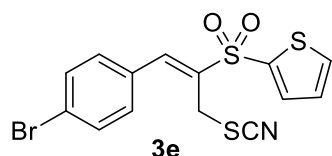

White solid (60.6 mg, 76%); The product is purified with silica gel chromatography (eluent: petroleum ether/ethyl acetate = 3:1);  $^1\text{H}$  NMR (400 MHz,  $\text{CDCl}_3$ )  $\delta$  8.07 – 7.99 (m, 1H), 7.84 – 7.75 (m, 2H), 7.68 – 7.56 (m, 2H), 7.43 – 7.31 (m, 2H), 7.24 – 7.16 (m, 1H), 4.23 (s, 2H);  $^{13}\text{C}$  NMR (100 MHz,  $\text{CDCl}_3$ )  $\delta$  142.7, 139.6, 135.8, 135.5, 135.4, 132.7, 131.0, 130.6, 128.4, 125.8, 110.8, 30.2; HRMS (ESI)  $m/z$ :  $[\text{M}+\text{H}]^+$  calcd for  $\text{C}_{14}\text{H}_{11}\text{BrNO}_2\text{S}_3$  399.9130, found 399.9155.

**(E)-2-((3-thiocyanato-1-(4-(trifluoromethyl)phenyl)prop-1-en-2-yl)sulfonyl)thiophene (3f)**

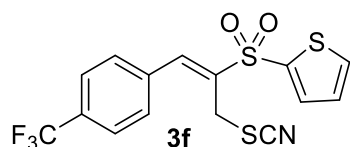

White solid (56.6 mg, 73%); The product is purified with silica gel chromatography (eluent: petroleum ether/ethyl acetate = 3:1);  $^1\text{H}$  NMR (400 MHz,  $\text{CDCl}_3$ )  $\delta$  8.13 (s, 1H), 7.83 (d,  $J$  = 4.3 Hz, 2H), 7.76 (d,  $J$  = 8.0 Hz, 2H), 7.60 (d,  $J$  = 8.0 Hz, 2H), 7.22 (t,  $J$  = 4.4 Hz, 1H), 4.21 (s, 2H);  $^{13}\text{C}$  NMR (100 MHz,  $\text{CDCl}_3$ )  $\delta$  142.2, 139.4, 138.0, 135.8, 135.6, 135.3, 132.4 (q,  $J$  = 32.9 Hz), 129.6, 128.5, 126.3 (q,  $J$  = 3.7 Hz), 123.4 (q,  $J$  = 270.9 Hz), 110.6, 29.8; HRMS (ESI)  $m/z$ :  $[\text{M}+\text{H}]^+$  calcd for  $\text{C}_{15}\text{H}_{11}\text{F}_3\text{NO}_2\text{S}_3$  389.9899, found 389.9912.

**(E)-2-((1-([1,1'-biphenyl]-4-yl)-3-thiocyanatoprop-1-en-2-yl)sulfonyl)thiophene (3g)**

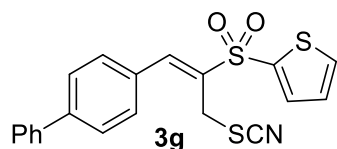

White solid (54.6 mg, 69%); The product is purified with silica gel chromatography (eluent: petroleum ether/ethyl acetate = 3:1);  $^1\text{H}$  NMR (400 MHz,  $\text{CDCl}_3$ )  $\delta$  8.13 (s, 1H), 7.85 – 7.71 (m, 4H), 7.67 – 7.57 (m, 4H), 7.54 – 7.38 (m, 3H), 7.24 – 7.17 (m, 1H), 4.35 (s, 2H).;  $^{13}\text{C}$  NMR (100 MHz,  $\text{CDCl}_3$ )  $\delta$  143.9, 143.5, 139.9, 139.3, 135.2, 135.1, 134.2, 130.5, 130.4, 129.0, 128.3, 128.2, 127.9, 127.0, 111.0, 30.6; HRMS (ESI)  $m/z$ :  $[\text{M}+\text{H}]^+$  calcd for  $\text{C}_{20}\text{H}_{16}\text{NO}_2\text{S}_3$  398.0338, found 398.0337.

**(E)-2-((3-thiocyanato-1-(p-tolyl)prop-1-en-2-yl)sulfonyl)thiophene (3h)**

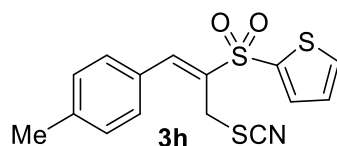

White solid (51.1 mg, 76%); The product is purified with silica gel chromatography (eluent: petroleum ether/ethyl acetate = 3:1);  $^1\text{H}$  NMR (400 MHz,  $\text{CDCl}_3$ )  $\delta$  8.11 – 8.00 (m, 1H), 7.83 – 7.73 (m, 2H), 7.46 – 7.37 (m, 2H), 7.36 – 7.26 (m, 2H), 7.22 – 7.12 (m, 1H), 4.30 (s, 2H), 2.40 (s, 3H);  $^{13}\text{C}$  NMR (100 MHz,  $\text{CDCl}_3$ )  $\delta$  144.0, 141.9, 140.0, 135.1, 135.0, 133.5, 130.1, 129.8, 128.9, 128.3, 111.1, 30.7, 21.5; HRMS (ESI)  $m/z$ :  $[\text{M}+\text{H}]^+$  calcd for  $\text{C}_{15}\text{H}_{14}\text{NO}_2\text{S}_3$  336.0181, found 336.0198.

**(E)-2-((1-(4-(tert-butyl)phenyl)-3-thiocyanatoprop-1-en-2-yl)sulfonyl)thiophene (3i)**

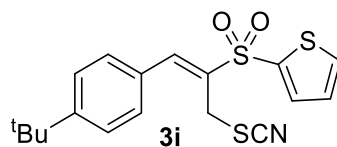

White solid (52.5 mg, 70%); The product is purified with silica gel chromatography (eluent: petroleum ether/ethyl acetate = 3:1);  $^1\text{H}$  NMR (400 MHz,  $\text{CDCl}_3$ )  $\delta$  8.12 – 8.02 (m, 1H), 7.82 – 7.73 (m, 2H), 7.57 – 7.44 (m, 4H), 7.22 – 7.14 (m, 1H), 4.31 (s, 2H), 1.34 (s, 9H);  $^{13}\text{C}$  NMR (100 MHz,  $\text{CDCl}_3$ )  $\delta$  155.0, 143.9, 140.0, 135.1, 135.0, 133.5, 129.8, 128.8, 128.2, 126.4, 111.1, 35.0, 31.0, 30.8; HRMS (ESI)  $m/z$ :  $[\text{M}+\text{H}]^+$  calcd for  $\text{C}_{18}\text{H}_{20}\text{NO}_2\text{S}_3$  378.0651, found 378.0619.

**(E)-2-((1-(4-methoxyphenyl)-3-thiocyanatoprop-1-en-2-yl)sulfonyl)thiophene (3j)**

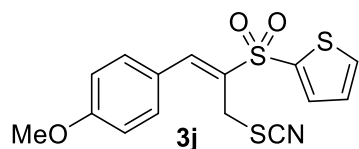

White solid (50.8 mg, 72%); The product is purified with silica gel chromatography (eluent: petroleum ether/ethyl acetate = 3:1);  $^1\text{H}$  NMR (400 MHz,  $\text{CDCl}_3$ )  $\delta$  8.00 (s, 1H), 7.85 – 7.71 (m, 2H), 7.61 – 7.47 (m, 2H), 7.23 – 7.14 (m, 1H), 7.07 – 6.96 (m, 2H), 4.34 (s, 2H), 3.86 (s, 3H);  $^{13}\text{C}$  NMR (100 MHz,  $\text{CDCl}_3$ )  $\delta$  162.0, 143.5, 140.3, 134.9, 134.8, 132.2, 131.4, 128.2, 124.1, 114.9, 111.1, 55.5, 31.0; HRMS (ESI)  $m/z$ :  $[\text{M}+\text{H}]^+$  calcd for  $\text{C}_{15}\text{H}_{14}\text{NO}_3\text{S}_3$  352.0130, found 352.0133.

**(E)-2-((1-(naphthalen-2-yl)prop-1-en-2-yl)sulfonyl)thiophene (3k)**

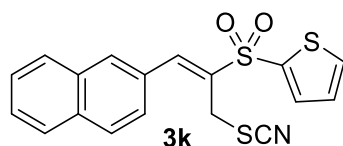

White solid (48.4 mg, 65%); The product is purified with silica gel chromatography (eluent: petroleum ether/ethyl acetate = 3:1);  $^1\text{H}$  NMR (400 MHz,  $\text{CDCl}_3$ )  $\delta$  8.25 (s, 1H), 8.05 (s, 1H), 8.00 – 7.91 (m, 2H), 7.90 – 7.74 (m, 3H), 7.63 – 7.50 (m, 3H), 7.25 – 7.17 (m, 1H), 4.37 (s, 2H);  $^{13}\text{C}$  NMR (100 MHz,  $\text{CDCl}_3$ )  $\delta$  144.0, 140.0, 135.3, 135.2, 135.0, 134.0, 133.0, 130.8, 129.3, 129.2, 128.9, 128.4, 128.2, 127.8, 127.3, 125.6, 111.2, 30.8; HRMS (ESI)  $m/z$ :  $[\text{M}+\text{H}]^+$  calcd for  $\text{C}_{18}\text{H}_{14}\text{NO}_2\text{S}_3$  372.0181, found 372.0194.

**(E)-2-((3-thiocyanato-1-(thiophen-2-yl)prop-1-en-2-yl)sulfonyl)thiophene (3l)**

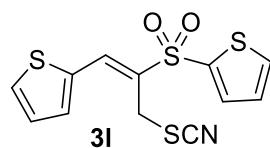

White solid (43.5 mg, 66%); The product is purified with silica gel chromatography (eluent: petroleum ether/ethyl acetate = 3:1);  $^1\text{H}$  NMR (400 MHz,  $\text{CDCl}_3$ )  $\delta$  8.18 (s, 1H), 7.80 – 7.70 (m, 3H), 7.54 – 7.48 (m, 1H), 7.25 – 7.11 (m, 2H), 4.43 (s, 2H);  $^{13}\text{C}$  NMR (100 MHz,  $\text{CDCl}_3$ )  $\delta$  140.0, 136.1, 135.8, 135.0, 134.8, 134.2, 133.5, 129.6, 128.4, 128.3, 111.1, 30.8; HRMS (ESI)  $m/z$ :  $[\text{M}+\text{H}]^+$  calcd for  $\text{C}_{12}\text{H}_{10}\text{NO}_2\text{S}_4$  327.9589, found 327.9592.

**(E)-2-((3-phenyl-1-thiocyanatobut-2-en-2-yl)sulfonyl)thiophene (3m)**

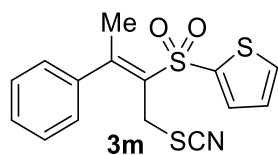

White solid (47.5 mg, 71%); The product is purified with silica gel chromatography (eluent: petroleum ether/ethyl acetate = 3:1);  $^1\text{H}$  NMR (400 MHz,  $\text{CDCl}_3$ )  $\delta$  7.91 – 7.82 (m, 1H), 7.81 – 7.74 (m, 1H), 7.50 – 7.33 (m, 3H), 7.23 – 7.11 (m, 3H), 3.99 (s, 2H), 2.53 (s, 3H);  $^{13}\text{C}$  NMR (100 MHz,  $\text{CDCl}_3$ )  $\delta$  158.5, 142.5, 140.3, 134.29, 134.25, 129.03, 128.96, 127.7, 126.5, 111.6, 34.2, 24.1; HRMS (ESI)  $m/z$ :  $[\text{M}+\text{H}]^+$  calcd for  $\text{C}_{15}\text{H}_{14}\text{NO}_2\text{S}_3$  336.0181, found 336.0166.

**2-((1,1-diphenyl-3-thiocyanatoprop-1-en-2-yl)sulfonyl)thiophene (3n)**

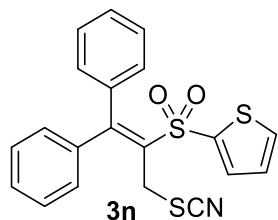

White solid (55.7 mg, 70%); The product is purified with silica gel chromatography (eluent: petroleum ether/ethyl acetate = 3:1);  $^1\text{H}$  NMR (400 MHz,  $\text{CDCl}_3$ )  $\delta$  7.55 – 7.49 (m, 1H), 7.40 – 7.29 (m, 3H), 7.25 – 7.22 (m, 1H), 7.19 – 7.12 (m, 4H), 7.08 – 7.01 (m, 2H), 6.92 – 6.85 (m, 1H), 6.77 – 6.68 (m, 1H), 4.22 (s, 2H);  $^{13}\text{C}$  NMR (100 MHz,  $\text{CDCl}_3$ )  $\delta$  158.6, 140.7, 139.0, 137.5, 137.2, 135.1, 134.2, 129.3, 129.0, 128.84, 128.81, 128.5, 127.8, 126.8, 110.7, 34.1; HRMS (ESI)  $m/z$ :  $[\text{M}+\text{H}]^+$  calcd for  $\text{C}_{20}\text{H}_{16}\text{NO}_2\text{S}_3$  398.0338, found 398.0317.

**(E)-2-((1-cyclohexyl-3-thiocyanatoprop-1-en-2-yl)sulfonyl)thiophene (3o)**

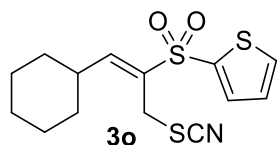

Light yellow oil (37.0 mg, 56%); The product is purified with silica gel chromatography (eluent: petroleum ether/ethyl acetate = 3:1);  $^1\text{H}$  NMR (400 MHz,  $\text{CDCl}_3$ )  $\delta$  7.74 (d,  $J$  = 5.1 Hz, 1H), 7.69 (d,  $J$  = 3.7 Hz, 1H), 7.15 (t,  $J$  = 4.7 Hz, 1H), 7.07 (d,  $J$  = 10.8 Hz, 1H), 4.01 (s, 2H), 2.45 – 2.32 (m, 1H), 1.83 – 1.64 (m, 5H), 1.39 – 1.19 (m, 5H);  $^{13}\text{C}$  NMR (100 MHz,  $\text{CDCl}_3$ )  $\delta$  153.2, 140.6, 134.9, 134.7, 134.1,

128.2, 111.2, 38.9, 31.8, 28.9, 25.3, 24.8; HRMS (ESI)  $m/z$ :  $[M+H]^+$  calcd for  $C_{114}H_{18}NO_2S_3$  328.0494, found 328.0498.

**(E)-((1-phenyl-3-thiocyanatoprop-1-en-2-yl)sulfonyl)benzene (4a)**

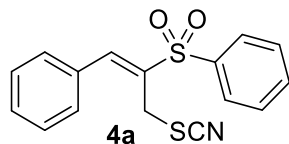

White solid (47.8 mg, 76%); The product is purified with silica gel chromatography (eluent: petroleum ether/ethyl acetate = 3:1);  $^1H$  NMR (400 MHz,  $CDCl_3$ )  $\delta$  8.16 – 8.09 (m, 1H), 8.02 – 7.92 (m, 2H), 7.75 – 7.55 (m, 3H), 7.55 – 7.46 (m, 5H), 4.19 (s, 2H);  $^{13}C$  NMR (100 MHz,  $CDCl_3$ )  $\delta$  144.5, 138.8, 134.5, 134.2, 131.9, 131.0, 129.63, 129.58, 129.4, 128.4, 110.9, 30.4; HRMS (ESI)  $m/z$ :  $[M+Na]^+$  calcd for  $C_{16}H_{14}NO_2S_2$  316.0460, found 316.0443.

**(E)-1-methyl-4-((1-phenyl-3-thiocyanatoprop-1-en-2-yl)sulfonyl)benzene (4b)**

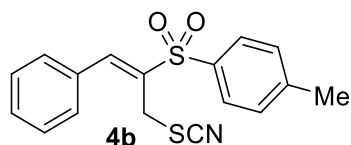

White solid (51.2 mg, 78%); The product is purified with silica gel chromatography (eluent: petroleum ether/ethyl acetate = 3:1);  $^1H$  NMR (400 MHz,  $CDCl_3$ )  $\delta$  8.08 (s, 1H), 7.84 (d,  $J$  = 8.1 Hz, 2H), 7.51 – 7.48 (m, 5H), 7.38 (d,  $J$  = 7.7 Hz, 2H), 4.17 (s, 2H), 2.45 (s, 2H);  $^{13}C$  NMR (100 MHz,  $CDCl_3$ )  $\delta$  145.3, 143.8, 135.6, 134.7, 131.9, 130.8, 130.2, 129.4, 129.2, 128.3, 110.0, 30.3, 21.6; HRMS (ESI)  $m/z$ :  $[M+H]^+$  calcd for  $C_{15}H_{14}NO_2S_3$  336.0181, found 336.0134.

**(E)-1-chloro-4-((1-phenyl-3-thiocyanatoprop-1-en-2-yl)sulfonyl)benzene (4c)**

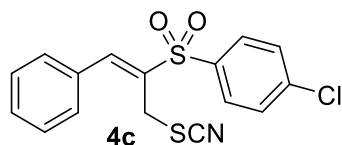

White solid (49.2 mg, 70%); The product is purified with silica gel chromatography (eluent: petroleum ether/ethyl acetate = 3:1);  $^1H$  NMR (400 MHz,  $CDCl_3$ )  $\delta$  8.12 (s, 1H), 7.91 (d,  $J$  = 8.4 Hz, 2H), 7.57 (d,  $J$  = 8.4 Hz, 2H), 7.51 – 7.48 (m, 5H), 4.19 (s, 2H);  $^{13}C$  NMR (100 MHz,  $CDCl_3$ )  $\delta$  145.0, 140.9, 137.4, 134.1, 131.6, 131.0, 129.8, 129.7, 129.5, 129.3, 110.6, 30.2; HRMS (ESI)  $m/z$ :  $[M+H]^+$  calcd for  $C_{14}H_{11}ClNO_2S_3$

355.9635, found 355.9657.

**(E)-1-bromo-3-((1-phenyl-3-thiocyanatoprop-1-en-2-yl)sulfonyl)benzene (4d)**

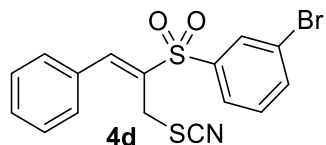

White solid (57.8 mg, 73%); The product is purified with silica gel chromatography (eluent: petroleum ether/ethyl acetate = 3:1);  $^1\text{H}$  NMR (400 MHz,  $\text{CDCl}_3$ )  $\delta$  8.18 – 8.02 (m, 2H), 7.96 – 7.88 (m, 1H), 7.86 – 7.73 (m, 1H), 7.55 – 7.43 (m, 6H), 4.19 (s, 2H);  $^{13}\text{C}$  NMR (100 MHz,  $\text{CDCl}_3$ )  $\delta$  145.4, 140.8, 137.1, 133.8, 131.6, 131.2, 131.0, 130.9, 129.6, 129.3, 126.8, 123.5, 110.6, 30.3; HRMS (ESI)  $m/z$ :  $[\text{M}+\text{H}]^+$  calcd for  $\text{C}_{14}\text{H}_{11}\text{BrNO}_2\text{S}_3$  399.9130, found 399.9103.

**(E)-4-((1-phenyl-3-thiocyanatoprop-1-en-2-yl)sulfonyl)benzonitrile (4e)**

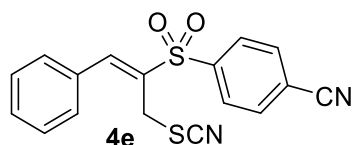

White solid (47.0 mg, 69%); The product is purified with silica gel chromatography (eluent: petroleum ether/ethyl acetate = 2:1);  $^1\text{H}$  NMR (400 MHz,  $\text{CDCl}_3$ )  $\delta$  8.18 (s, 1H), 8.15 – 8.07 (m, 2H), 7.96 – 7.84 (m, 2H), 7.58 – 7.47 (m, 5H), 4.22 (s, 2H).  $^{13}\text{C}$  NMR (100 MHz,  $\text{CDCl}_3$ )  $\delta$  146.6, 143.6, 133.4, 133.2, 131.5, 131.4, 129.7, 129.5, 128.9, 117.8, 116.9, 110.2, 30.2; HRMS (ESI)  $m/z$ :  $[\text{M}+\text{H}]^+$  calcd for  $\text{C}_{17}\text{H}_{13}\text{N}_2\text{O}_2\text{S}_2$  341.0413, found 341.0446.

**(E)-1-nitro-4-((1-phenyl-3-thiocyanatoprop-1-en-2-yl)sulfonyl)benzene (4f)**

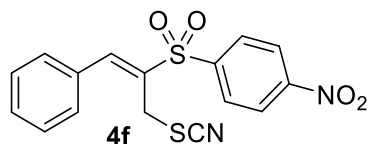

White solid (47.1 mg, 65%); The product is purified with silica gel chromatography (eluent: petroleum ether/ethyl acetate = 3:1);  $^1\text{H}$  NMR (400 MHz,  $\text{CDCl}_3$ )  $\delta$  8.54 – 8.36 (m, 2H), 8.26 – 8.13 (m, 3H), 7.63 – 7.38 (m, 5H), 4.25 (s, 2H).  $^{13}\text{C}$  NMR (100 MHz,  $\text{CDCl}_3$ )  $\delta$  150.9, 146.8, 145.2, 133.4, 131.5, 131.4, 129.7, 129.5, 124.7, 110.2, 30.2; HRMS (ESI)  $m/z$ :  $[\text{M}+\text{H}]^+$  calcd for  $\text{C}_{16}\text{H}_{13}\text{F}_3\text{N}_2\text{O}_4\text{S}_2$  361.0311, found 361.0301.

**(E)-1-((1-phenyl-3-thiocyanatoprop-1-en-2-yl)sulfonyl)naphthalene (4g)**

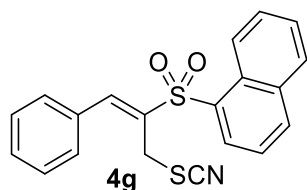

White solid (50.0 mg, 74%); The product is purified with silica gel chromatography (eluent: petroleum ether/ethyl acetate = 3:1);  $^1\text{H}$  NMR (400 MHz,  $\text{CDCl}_3$ )  $\delta$  8.62 – 8.54 (m, 1H), 8.54 – 8.46 (m, 1H), 8.32 – 8.27 (m, 1H), 8.23 – 8.13 (m, 1H), 8.05 – 7.88 (m, 1H), 7.77 – 7.56 (m, 3H), 7.49 – 7.46 (m, 5H), 4.08 (s, 2H).  $^{13}\text{C}$  NMR (100 MHz,  $\text{CDCl}_3$ )  $\delta$  143.9, 136.1, 134.4, 134.2, 132.1, 131.8, 131.7, 130.8, 129.4, 129.34, 129.26, 128.8, 128.4, 127.2, 124.6, 123.7, 110.9, 30.3; HRMS (ESI)  $m/z$ :  $[\text{M}+\text{Na}]^+$  calcd for  $\text{C}_{20}\text{H}_{16}\text{NO}_2\text{S}_2$  366.0617, found 366.0662.

**(E)-1-((1-phenyl-3-thiocyanatoprop-1-en-2-yl)sulfonyl)naphthalene (4h)**

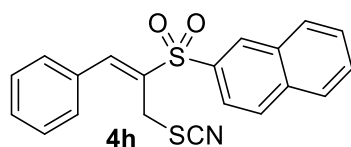

White solid (46.8 mg, 64%); The product is purified with silica gel chromatography (eluent: petroleum ether/ethyl acetate = 3:1);  $^1\text{H}$  NMR (400 MHz,  $\text{CDCl}_3$ )  $\delta$  8.60 (s, 1H), 8.25 – 8.14 (m, 1H), 8.11 – 7.83 (m, 4H), 7.74 – 7.63 (m, 2H), 7.55 – 7.44 (m, 5H), 4.22 (s, 2H);  $^{13}\text{C}$  NMR (100 MHz,  $\text{CDCl}_3$ )  $\delta$  144.4, 135.35, 135.28, 134.4, 132.0, 131.8, 130.9, 130.3, 130.0, 129.6, 129.5, 129.4, 129.3, 127.93, 127.87, 122.5, 110.9, 30.4; HRMS (ESI)  $m/z$ :  $[\text{M}+\text{Na}]^+$  calcd for  $\text{C}_{20}\text{H}_{16}\text{NO}_2\text{S}_2$  366.0617, found 366.0655.

**(E)-3-((1-phenyl-3-thiocyanatoprop-1-en-2-yl)sulfonyl)thiophene (4i)**

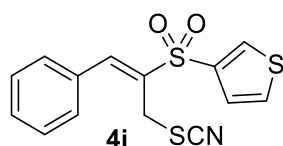

White solid (46.2 mg, 72%); The product is purified with silica gel chromatography (eluent: petroleum ether/ethyl acetate = 3:1);  $^1\text{H}$  NMR (400 MHz,  $\text{CDCl}_3$ )  $\delta$  8.22 (s, 1H), 8.10 (s, 1H), 7.58 – 7.44 (m, 6H), 7.42 – 7.37 (m, 1H), 4.24 (s, 2H)..  $^{13}\text{C}$  NMR (100 MHz,  $\text{CDCl}_3$ )  $\delta$  144.1, 138.9, 134.6, 133.7, 131.7, 130.9, 129.5, 129.3, 129.0, 125.9, 110.9, 30.3; HRMS (ESI)  $m/z$ :  $[\text{M}+\text{H}]^+$  calcd for  $\text{C}_{14}\text{H}_{12}\text{NO}_2\text{S}_3$  322.0025,

found 322.0042.

**(E)-3-((1-phenyl-3-thiocyanatoprop-1-en-2-yl)sulfonyl)pyridine (4j)**

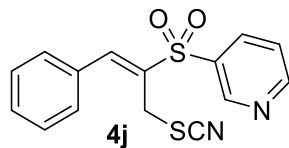

White solid (29.4 mg, 46%); The product is purified with silica gel chromatography (eluent: petroleum ether/ethyl acetate = 2:1);  $^1\text{H}$  NMR (400 MHz,  $\text{CDCl}_3$ )  $\delta$  9.20 – 9.16 (m, 1H), 8.98 – 8.75 (m, 1H), 8.34 – 8.23 (m, 1H), 8.21 – 8.12 (m, 1H), 7.60 – 7.33 (m, 5H), 4.24 (s, 2H).  $^{13}\text{C}$  NMR (100 MHz,  $\text{CDCl}_3$ )  $\delta$  154.4, 149.2, 146.0, 136.0, 135.8, 134.0, 131.5, 131.3, 129.6, 129.4, 124.0, 110.3, 30.2; HRMS (ESI)  $m/z$ :  $[\text{M}+\text{H}]^+$  calcd for  $\text{C}_{15}\text{H}_{13}\text{N}_2\text{O}_2\text{S}_2$  317.0413, found 317.0428.

**(E)-2-(ethylsulfonyl)-3-thiocyanatoprop-1-en-1-ylbenzene (4k)**

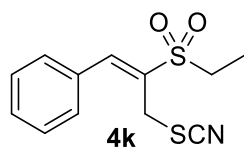

White solid (40.1 mg, 75%); The product is purified with silica gel chromatography (eluent: petroleum ether/ethyl acetate = 3:1);  $^1\text{H}$  NMR (400 MHz,  $\text{CDCl}_3$ )  $\delta$  7.90 (s, 1H), 7.52 – 7.47 (m, 5H), 4.31 (s, 2H), 3.27 (q,  $J = 7.2, 6.7$  Hz, 2H), 1.45 (t,  $J = 7.3$  Hz, 3H).  $^{13}\text{C}$  NMR (100 MHz,  $\text{CDCl}_3$ )  $\delta$  147.1, 132.8, 131.8, 130.9, 129.4, 129.3, 110.6, 50.2, 30.3, 7.1; HRMS (ESI)  $m/z$ :  $[\text{M}+\text{H}]^+$  calcd for  $\text{C}_{12}\text{H}_{14}\text{NO}_2\text{S}_2$  268.0460, found 268.0445.

**(E)-2-((2-chloroethyl)sulfonyl)-3-thiocyanatoprop-1-en-1-ylbenzene (4l)**

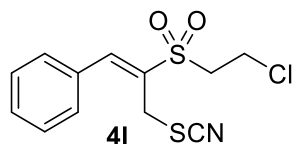

White solid (36.7 mg, 61%); The product is purified with silica gel chromatography (eluent: petroleum ether/ethyl acetate = 3:1);  $^1\text{H}$  NMR (400 MHz,  $\text{CDCl}_3$ )  $\delta$  7.97 (s, 1H), 7.55 – 7.49 (m, 5H), 4.34 (s, 2H), 3.94 (t,  $J = 7.2$  Hz, 2H), 3.70 (t,  $J = 7.2$  Hz, 2H).  $^{13}\text{C}$  NMR (100 MHz,  $\text{CDCl}_3$ )  $\delta$  148.0, 133.5, 131.6, 131.3, 129.5, 129.4, 110.4, 57.7, 35.5, 30.4; HRMS (ESI)  $m/z$ :  $[\text{M}+\text{H}]^+$  calcd for  $\text{C}_{12}\text{H}_{13}\text{ClNO}_2\text{S}_2$  302.0071, found 302.0050.

**(E)-(2-((2-methoxyethyl)sulfonyl)-3-thiocyanatoprop-1-en-1-yl)benzene (4m)**

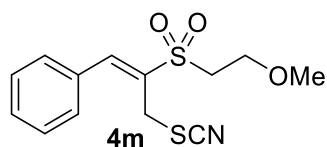

White solid (40.6 mg, 68%); The product is purified with silica gel chromatography (eluent: petroleum ether/ethyl acetate = 3:1);  $^1\text{H}$  NMR (400 MHz,  $\text{CDCl}_3$ )  $\delta$  7.89 (s, 1H), 7.54 – 7.46 (m, 5H), 4.32 (s, 2H), 3.95 – 3.77 (m, 2H), 3.56 – 3.43 (m, 2H), 3.31 (s, 3H).  $^{13}\text{C}$  NMR (100 MHz,  $\text{CDCl}_3$ )  $\delta$  146.1, 134.3, 131.9, 130.8, 129.28, 129.26, 111.2, 65.7, 58.8, 55.9, 30.6; HRMS (ESI)  $m/z$ :  $[\text{M}+\text{H}]^+$  calcd for  $\text{C}_{13}\text{H}_{16}\text{NO}_3\text{S}_2$  298.0566, found 298.0537.

**(E)-(2-(cyclopropylsulfonyl)-3-thiocyanatoprop-1-en-1-yl)benzene (4n)**

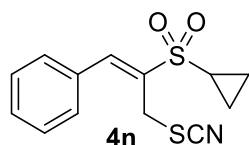

White solid (39.9 mg, 71%); The product is purified with silica gel chromatography (eluent: petroleum ether/ethyl acetate = 3:1);  $^1\text{H}$  NMR (400 MHz,  $\text{CDCl}_3$ )  $\delta$  7.88 (s, 1H), 7.55 – 7.43 (m, 5H), 4.34 (s, 2H), 2.76 – 2.50 (m, 1H), 1.44 – 1.32 (m, 2H), 1.26 – 1.14 (m, 2H).  $^{13}\text{C}$  NMR (100 MHz,  $\text{CDCl}_3$ )  $\delta$  145.2, 134.6, 132.0, 130.8, 129.4, 129.3, 110.8, 32.2, 30.4, 6.6; HRMS (ESI)  $m/z$ :  $[\text{M}+\text{H}]^+$  calcd for  $\text{C}_{13}\text{H}_{14}\text{NO}_2\text{S}_2$  280.0460, found 280.0487.

**(E)-(2-(cyclohexylsulfonyl)-3-thiocyanatoprop-1-en-1-yl)benzene (4o)**

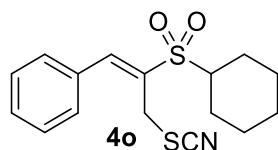

White solid (43.1 mg, 67%); The product is purified with silica gel chromatography (eluent: petroleum ether/ethyl acetate = 3:1);  $^1\text{H}$  NMR (400 MHz,  $\text{CDCl}_3$ )  $\delta$  7.81 (s, 1H), 7.53 – 7.44 (m, 5H), 4.30 (s, 2H), 3.23 – 2.99 (m, 1H), 2.35 – 2.13 (m, 2H), 2.04 – 1.88 (m, 2H), 1.77 – 1.67 (m, 1H), 1.65 – 1.49 (m, 2H), 1.44 – 1.15 (m, 3H).  $^{13}\text{C}$  NMR (100 MHz,  $\text{CDCl}_3$ )  $\delta$  147.4, 131.9, 131.6, 130.8, 129.3, 129.2, 110.8, 62.6, 30.6, 24.95, 24.95, 24.90; HRMS (ESI)  $m/z$ :  $[\text{M}+\text{H}]^+$  calcd for  $\text{C}_{16}\text{H}_{20}\text{NO}_2\text{S}_2$  322.0930, found 322.0903.

**(E)-4-phenyl-3-(thiophen-2-ylsulfonyl)but-3-enitrile (5a)**

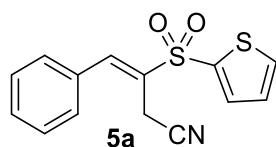

White solid (37.1 mg, 64%); The product is purified with silica gel chromatography (eluent: petroleum ether/ethyl acetate = 3:1);  $^1\text{H}$  NMR (400 MHz,  $\text{CDCl}_3$ )  $\delta$  8.08 (s, 1H), 7.88 – 7.78 (m, 2H), 7.56 – 7.42 (m, 5H), 7.26 – 7.18 (m, 1H), 3.67 (s, 2H);  $^{13}\text{C}$  NMR (100 MHz,  $\text{CDCl}_3$ )  $\delta$  142.4, 139.3, 135.6, 135.3, 131.8, 131.5, 130.8, 129.4, 129.3, 128.4, 115.1, 16.3; HRMS (ESI)  $m/z$ :  $[\text{M}+\text{H}]^+$  calcd for  $\text{C}_{12}\text{H}_{14}\text{NO}_2\text{S}_2$  290.0304, found 290.0336.

**(E)-4-(4-chlorophenyl)-3-(thiophen-2-ylsulfonyl)but-3-enitrile (5b)**

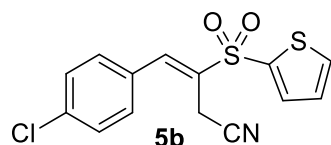

White solid (37.8 mg, 58%); The product is purified with silica gel chromatography (eluent: petroleum ether/ethyl acetate = 3:1);  $^1\text{H}$  NMR (400 MHz,  $\text{CDCl}_3$ )  $\delta$  8.03 (s, 1H), 7.89 – 7.76 (m, 2H), 7.53 – 7.36 (m, 4H), 7.27 – 7.19 (m, 1H), 3.64 (s, 2H);  $^{13}\text{C}$  NMR (100 MHz,  $\text{CDCl}_3$ )  $\delta$  141.0, 139.0, 137.2, 135.8, 135.5, 132.1, 130.7, 130.2, 129.7, 128.6, 114.9, 16.3; HRMS (ESI)  $m/z$ :  $[\text{M}+\text{H}]^+$  calcd for  $\text{C}_{14}\text{H}_{11}\text{ClNO}_2\text{S}_2$  323.9914, found 323.9902.

**(E)-4-(4-(tert-butyl)phenyl)-3-(thiophen-2-ylsulfonyl)but-3-enitrile (5c)**

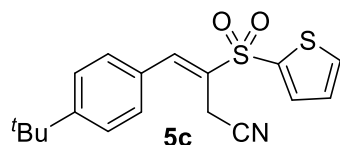

White solid (44.1 mg, 64%); The product is purified with silica gel chromatography (eluent: petroleum ether/ethyl acetate = 3:1);  $^1\text{H}$  NMR (400 MHz,  $\text{CDCl}_3$ )  $\delta$  8.05 (s, 1H), 7.83 – 7.75 (m, 2H), 7.57 – 7.47 (m, 2H), 7.46 – 7.38 (m, 2H), 7.24 – 7.16 (m, 1H), 3.68 (s, 2H), 1.33 (s, 9H);  $^{13}\text{C}$  NMR (100 MHz,  $\text{CDCl}_3$ )  $\delta$  154.7, 142.3, 139.5, 135.4, 135.1, 130.3, 129.6, 128.9, 128.4, 126.3, 115.2, 35.0, 31.0, 16.4; HRMS (ESI)  $m/z$ :  $[\text{M}+\text{H}]^+$  calcd for  $\text{C}_{12}\text{H}_{20}\text{NO}_2\text{S}_2$  346.0930, found 346.0911.

**4,4-diphenyl-3-(thiophen-2-ylsulfonyl)but-3-enitrile (5d)**

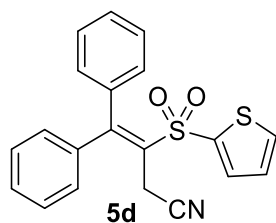

White solid (44.0 mg, 60%); The product is purified with silica gel chromatography (eluent: petroleum ether/ethyl acetate = 3:1);  $^1\text{H}$  NMR (400 MHz,  $\text{CDCl}_3$ )  $\delta$  7.59 (s, 1H), 7.42 – 7.34 (m, 3H), 7.33 – 7.18 (m, 5H), 7.19 – 7.12 (m, 1H), 7.10 – 7.03 (m, 2H), 6.94 – 6.83 (m, 1H), 3.61 (s, 2H);  $^{13}\text{C}$  NMR (100 MHz,  $\text{CDCl}_3$ )  $\delta$  157.9, 140.5, 139.5, 137.4, 135.0, 134.5, 132.6, 129.5, 129.0, 128.9, 128.8, 127.8, 127.6, 127.2, 117.0, 20.7; HRMS (ESI)  $m/z$ :  $[\text{M}+\text{H}]^+$  calcd for  $\text{C}_{20}\text{H}_{16}\text{NO}_2\text{S}_2$  366.0617, found 366.0654.

**(E)-4-cyclohexyl-3-(thiophen-2-ylsulfonyl)but-3-enitrile (5e)**

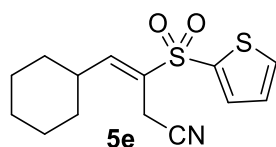

Light yellow oil (27.6 mg, 47%); The product is purified with silica gel chromatography (eluent: petroleum ether/ethyl acetate = 3:1);  $^1\text{H}$  NMR (400 MHz,  $\text{CDCl}_3$ )  $\delta$  7.77 (d,  $J$  = 4.9 Hz, 1H), 7.71 (d,  $J$  = 3.7 Hz, 1H), 7.17 (t,  $J$  = 4.6 Hz, 1H), 7.01 (d,  $J$  = 10.4 Hz, 1H), 3.47 (s, 2H), 2.42 – 2.27 (m, 1H), 1.85 – 1.67 (m, 5H), 1.39 – 1.11 (m, 5H);  $^{13}\text{C}$  NMR (100 MHz,  $\text{CDCl}_3$ )  $\delta$  151.0, 139.6, 135.2, 134.9, 130.2, 128.3, 115.1, 38.6, 31.0, 25.4, 25.0, 14.6; HRMS (ESI)  $m/z$ :  $[\text{M}+\text{H}]^+$  calcd for  $\text{C}_{14}\text{H}_{17}\text{NO}_2\text{S}_2$  295.0701, found 295.0708.

**(E)-4-phenyl-3-(phenylsulfonyl)but-3-enitrile (5f)**

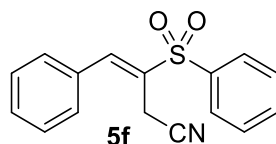

White solid (35.0 mg, 62%); The product is purified with silica gel chromatography (eluent: petroleum ether/ethyl acetate = 3:1);  $^1\text{H}$  NMR (400 MHz,  $\text{CDCl}_3$ )  $\delta$  8.09 (s, 1H), 8.02 – 7.94 (m, 2H), 7.74 – 7.65 (m, 1H), 7.66 – 7.56 (m, 2H), 7.52 – 7.39 (m, 5H), 3.59 (s, 2H);  $^{13}\text{C}$  NMR (100 MHz,  $\text{CDCl}_3$ )  $\delta$  142.8, 138.3, 134.3, 131.9, 131.0,

130.8, 129.7, 129.4, 129.3, 128.4, 115.1, 16.3; HRMS (ESI)  $m/z$ :  $[M+H]^+$  calcd for  $C_{16}H_{14}NO_2S$  284.0740, found 284.0791.

**(E)-3-(naphthalen-2-ylsulfonyl)-4-phenylbut-3-enitrile (5g)**

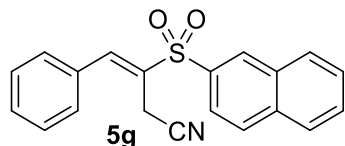

White solid (42.8 mg, 65%); The product is purified with silica gel chromatography (eluent: petroleum ether/ethyl acetate = 3:1);  $^1H$  NMR (400 MHz,  $CDCl_3$ )  $\delta$  8.62 (s, 1H), 8.16 (s, 1H), 8.06 – 7.99 (m, 2H), 7.96 – 7.85 (m, 2H), 7.72 – 7.61 (m, 2H), 7.50 – 7.41 (m, 5H), 3.61 (s, 2H);  $^{13}C$  NMR (100 MHz,  $CDCl_3$ )  $\delta$  142.9, 135.4, 134.9, 132.1, 131.9, 130.9, 130.7, 130.5, 130.1, 129.6, 129.4, 129.2, 128.0, 127.8, 122.5, 115.2, 16.3; HRMS (ESI)  $m/z$ :  $[M+H]^+$  calcd for  $C_{20}H_{16}NO_2S$  334.0896, found 334.0872.

**(E)-4-phenyl-3-(pyridin-3-ylsulfonyl)but-3-enitrile (5h)**

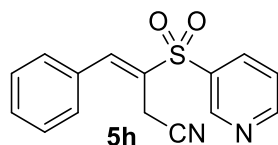

White solid (27.7 mg, 49%); The product is purified with silica gel chromatography (eluent: petroleum ether/ethyl acetate = 3:1);  $^1H$  NMR (400 MHz,  $CDCl_3$ )  $\delta$  9.18 (s, 1H), 8.90 (s, 1H), 8.30 – 8.22 (m, 1H), 8.13 (d,  $J$  = 2.8 Hz, 1H), 7.59 – 7.41 (m, 6H), 3.64 (s, 2H);  $^{13}C$  NMR (100 MHz,  $CDCl_3$ )  $\delta$  154.6, 149.2, 144.3, 136.0, 135.4, 131.5, 131.2, 130.5, 129.5, 129.4, 124.1, 114.9, 16.3; HRMS (ESI)  $m/z$ :  $[M+H]^+$  calcd for  $C_{15}H_{13}N_2O_2S$  285.0692, found 285.0637.

**(E)-3-(ethylsulfonyl)-4-phenylbut-3-enitrile (5i)**

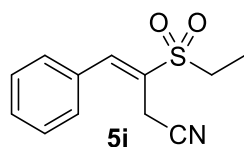

White solid (19.6 mg, 42%); The product is purified with silica gel chromatography (eluent: petroleum ether/ethyl acetate = 3:1);  $^1H$  NMR (400 MHz,  $CDCl_3$ )  $\delta$  7.89 (s, 1H), 7.55 – 7.43 (m, 5H), 3.74 (s, 2H), 3.25 (q,  $J$  = 7.3 Hz, 2H), 1.43 (t,  $J$  = 7.4 Hz, 3H);  $^{13}C$  NMR (100 MHz,  $CDCl_3$ )  $\delta$  145.6, 131.9, 130.9, 129.35, 129.35, 128.7, 115.9,

49.2, 16.5, 7.1; HRMS (ESI) m/z:  $[M+H]^+$  calcd for  $C_{12}H_{14}NO_2S$  236.0740, found 236.0748.

**(E)-2-((1-phenyl-3-((trifluoromethyl)thio)prop-1-en-2-yl)sulfonyl)thiophene (6)**

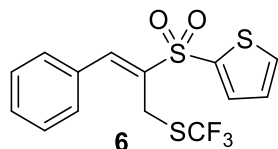

White solid; The product is purified with silica gel chromatography (eluent: petroleum ether/ethyl acetate = 10:1);  $^1H$  NMR (400 MHz,  $CDCl_3$ )  $\delta$  8.06 (s, 1H), 7.82 – 7.73 (m, 2H), 7.59 – 7.52 (m, 2H), 7.52 – 7.43 (m, 3H), 7.22 – 7.15 (m, 1H), 4.16 (s, 2H);  $^{13}C$  NMR (100 MHz,  $CDCl_3$ )  $\delta$  142.8, 140.1, 135.1, 135.00, 134.98, 132.2, 130.8, 130.1 (q,  $J = 305.8$  Hz), 129.7, 129.1, 128.1, 26.2 (q,  $J = 2.6$  Hz);  $^{19}F$  NMR (376 MHz,  $CDCl_3$ )  $\delta$  -42.5; HRMS (ESI) m/z:  $[M + Na]^+$  calcd for  $C_{14}H_{11}F_3NaO_2S_3$  386.9765, found 386.9761.

**(E)-2-((1-phenylprop-1-en-2-yl)sulfonyl)thiophene (7)**

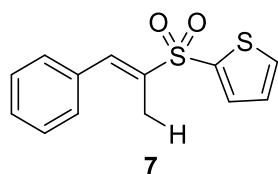

White solid; The product is purified with silica gel chromatography (eluent: petroleum ether/ethyl acetate = 5:1);  $^1H$  NMR (400 MHz,  $CDCl_3$ )  $\delta$  7.81 (s, 1H), 7.73 – 7.69 (m, 2H), 7.43 – 7.37 (m, 5H), 7.17 – 7.12 (m, 1H), 2.23 (s, 3H);  $^{13}C$  NMR (100 MHz,  $CDCl_3$ )  $\delta$  140.6, 137.9, 137.2, 134.1, 133.9, 133.7, 129.6, 129.4, 128.7, 127.8, 13.2; HRMS (ESI) m/z:  $[M + Na]^+$  calcd for  $C_{13}H_{12}NaO_2S_2$  287.0171, found 287.0170.

**(E)-2-((3-chloro-1-phenylprop-1-en-2-yl)sulfonyl)thiophene (8)**

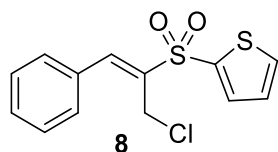

White solid; The product is purified with silica gel chromatography (eluent: petroleum ether/ethyl acetate = 5:1);  $^1H$  NMR (400 MHz,  $CDCl_3$ )  $\delta$  8.06 (s, 1H), 7.84

– 7.78 (m, 1H), 7.80 – 7.73 (m, 1H), 7.68 – 7.61 (m, 2H), 7.53 – 7.46 (m, 3H), 7.22 – 7.15 (m, 1H), 4.59 (s, 2H);  $^{13}\text{C}$  NMR (100 MHz,  $\text{CDCl}_3$ )  $\delta$  142.9, 141.0, 137.8, 134.8, 134.6, 132.2, 130.8, 130.0, 129.1, 127.9, 37.2; HRMS (ESI)  $m/z$ :  $[\text{M}+\text{H}]^+$  calcd for  $\text{C}_{13}\text{H}_{12}\text{ClO}_2\text{S}_2$  298.9962, found 298.9901.

## 7. X-ray structure of **3a** (CCDC 2536775)

The single crystal of compound **3a** was cultivated by slow evaporation technique. **3j** (50 mg) was dissolved in ethyl acetate and the solvent was allowed to evaporate in open air, and the resulting crystals of **3a** were collected for X-ray diffraction analysis. The crystal was tested on a Bruker D8 Quest diffractometer, and the structure was solved with the Superflip structure solution program using Charge Flipping and refined with the ShelXL refinement package using Least Squares minimization. X-ray structure of **3a** with thermal ellipsoids shown at the 50% probability level

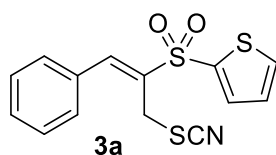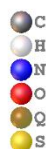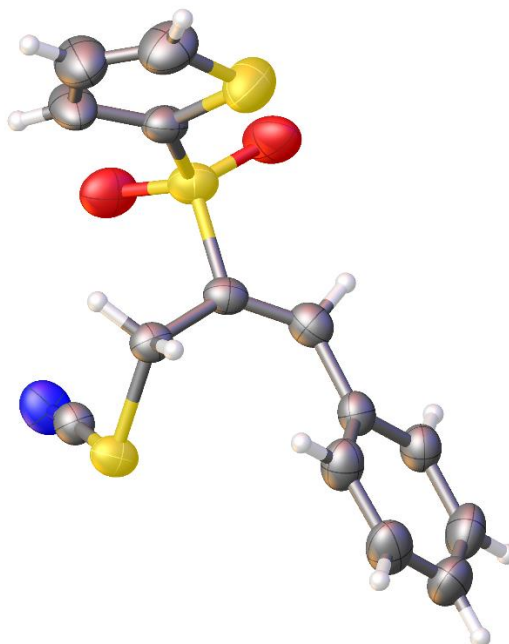

|                     |                                                   |
|---------------------|---------------------------------------------------|
| Identification code | 3a                                                |
| Empirical formula   | $\text{C}_{14}\text{H}_{11}\text{NO}_2\text{S}_3$ |
| Formula weight      | 321.42                                            |

|                                             |                                        |
|---------------------------------------------|----------------------------------------|
| Temperature/K                               | 296.15                                 |
| Crystal system                              | triclinic                              |
| Space group                                 | P-1                                    |
| a/Å                                         | 5.8621(3)                              |
| b/Å                                         | 9.7553(6)                              |
| c/Å                                         | 13.0274(8)                             |
| $\alpha$ /°                                 | 97.051(2)                              |
| $\beta$ /°                                  | 91.909(2)                              |
| $\gamma$ /°                                 | 98.638(2)                              |
| Volume/Å <sup>3</sup>                       | 729.95(7)                              |
| Z                                           | 2                                      |
| $\rho$ calc/g/cm <sup>3</sup>               | 1.462                                  |
| $\mu$ /mm <sup>-1</sup>                     | 0.506                                  |
| F(000)                                      | 332.0                                  |
| Crystal size/mm <sup>3</sup>                | 0.22 × 0.2 × 0.18                      |
| Radiation                                   | MoK $\alpha$ ( $\lambda$ = 0.71073)    |
| 2 $\Theta$ range for data collection/°      | 4.962 to 50.222                        |
| Index ranges                                | -6 ≤ h ≤ 6, -11 ≤ k ≤ 11, -15 ≤ l ≤ 14 |
| Reflections collected                       | 16673                                  |
| Independent reflections                     | 2554 [Rint = 0.0581, Rsigma = 0.0452]  |
| Data/restraints/parameters                  | 2554/0/181                             |
| Goodness-of-fit on F <sup>2</sup>           | 1.062                                  |
| Final R indexes [I ≥ 2 $\sigma$ (I)]        | R1 = 0.0540, wR2 = 0.1264              |
| Final R indexes [all data]                  | R1 = 0.0836, wR2 = 0.1448              |
| Largest diff. peak/hole / e Å <sup>-3</sup> | 0.44/-0.49                             |

## 8. References

- (1) Zhao, Z.; Racicot, L.; Murphy, G. K. *Angewandte Chemie International Edition*. 2017, 56, 11620–11623.

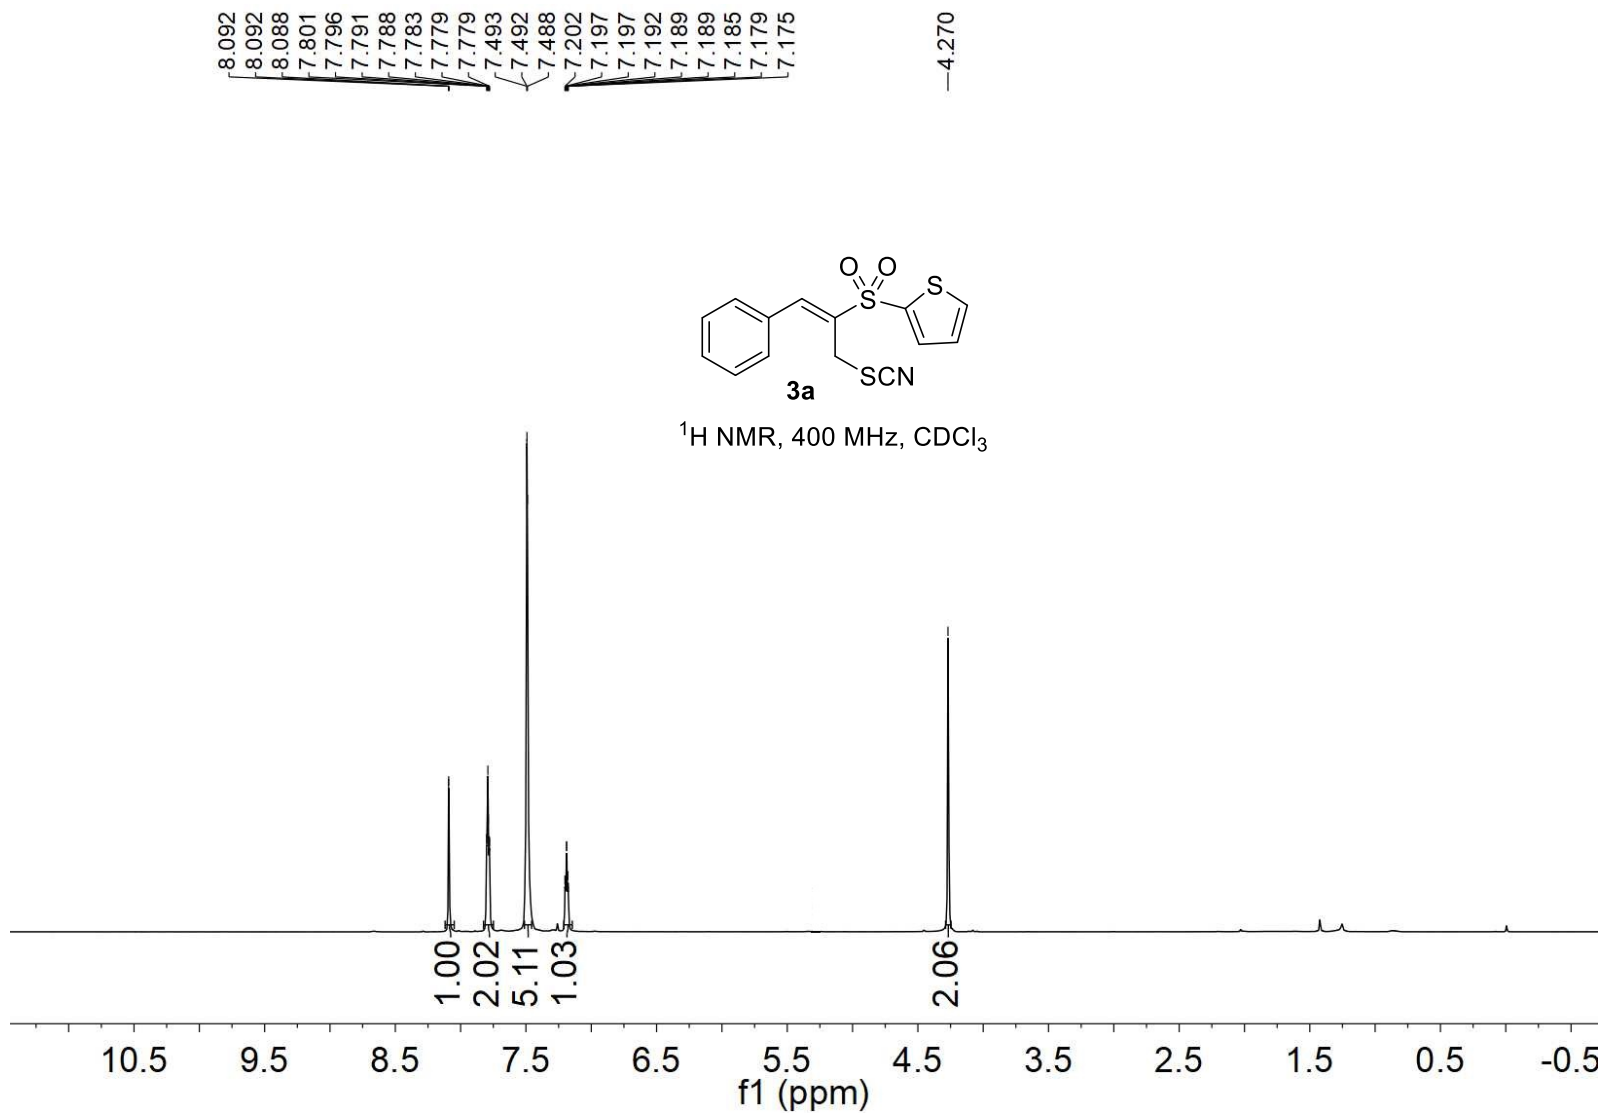

143.936  
139.802  
135.247  
135.112  
135.066  
131.708  
130.944  
129.511  
129.266  
128.277  
— 110.891

77.318  
77.000  
76.682

— 30.343

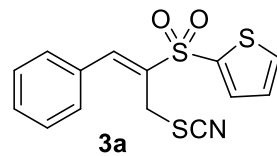

<sup>13</sup>C NMR, 100 MHz, CDCl<sub>3</sub>

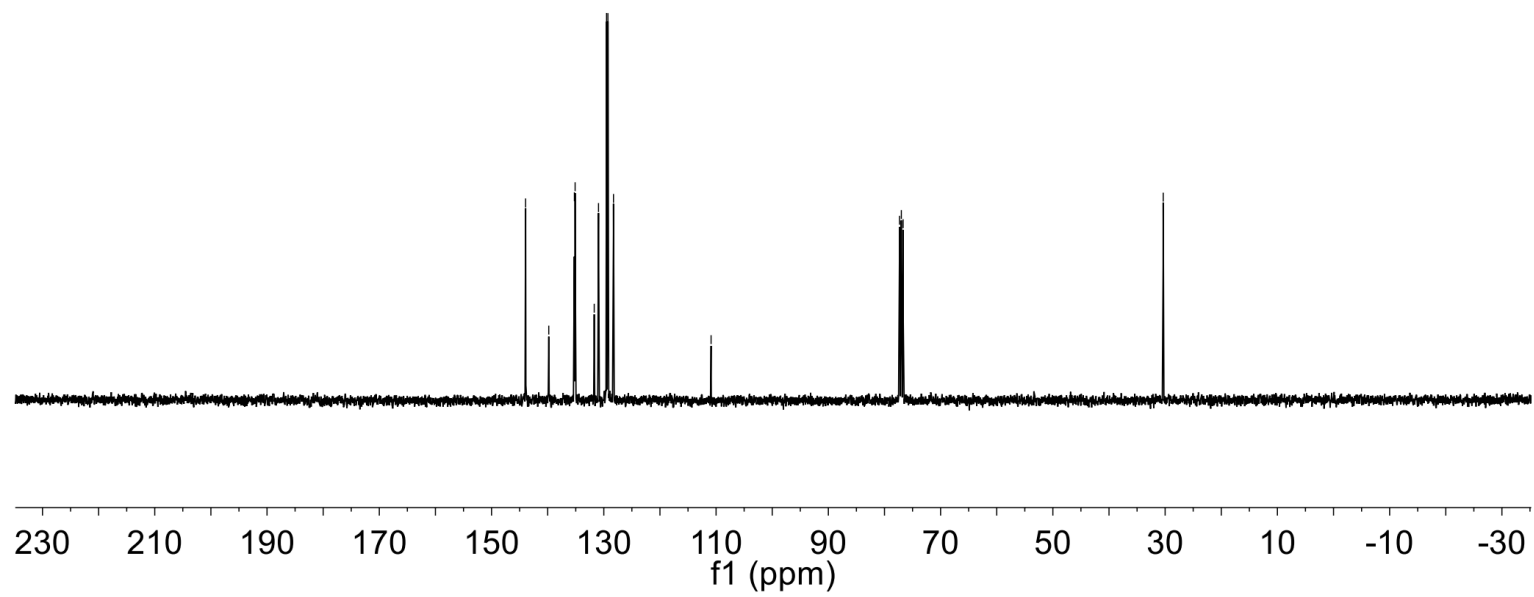

8.043  
7.809  
7.805  
7.795  
7.490  
7.468  
7.451  
7.451  
7.434  
7.429  
7.260  
7.212  
7.201  
7.190

4.242

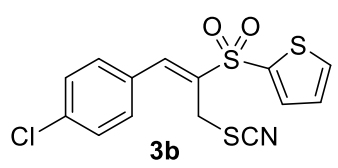

<sup>1</sup>H NMR, 400 MHz, CDCl<sub>3</sub>

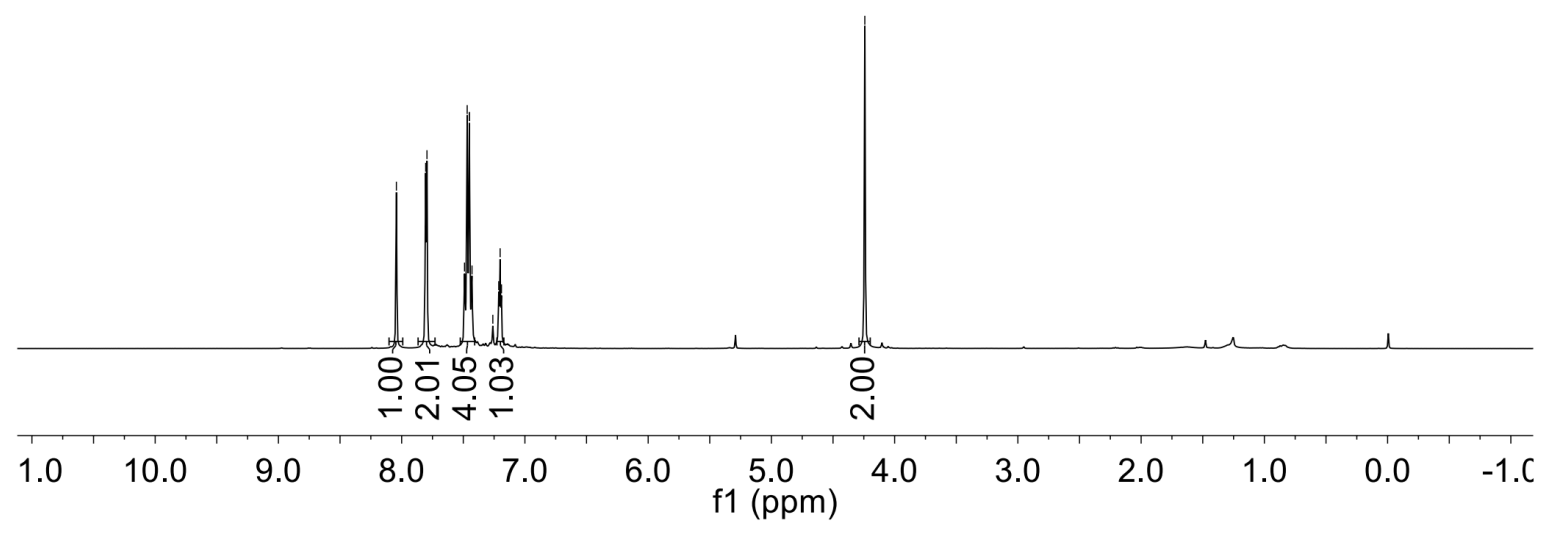

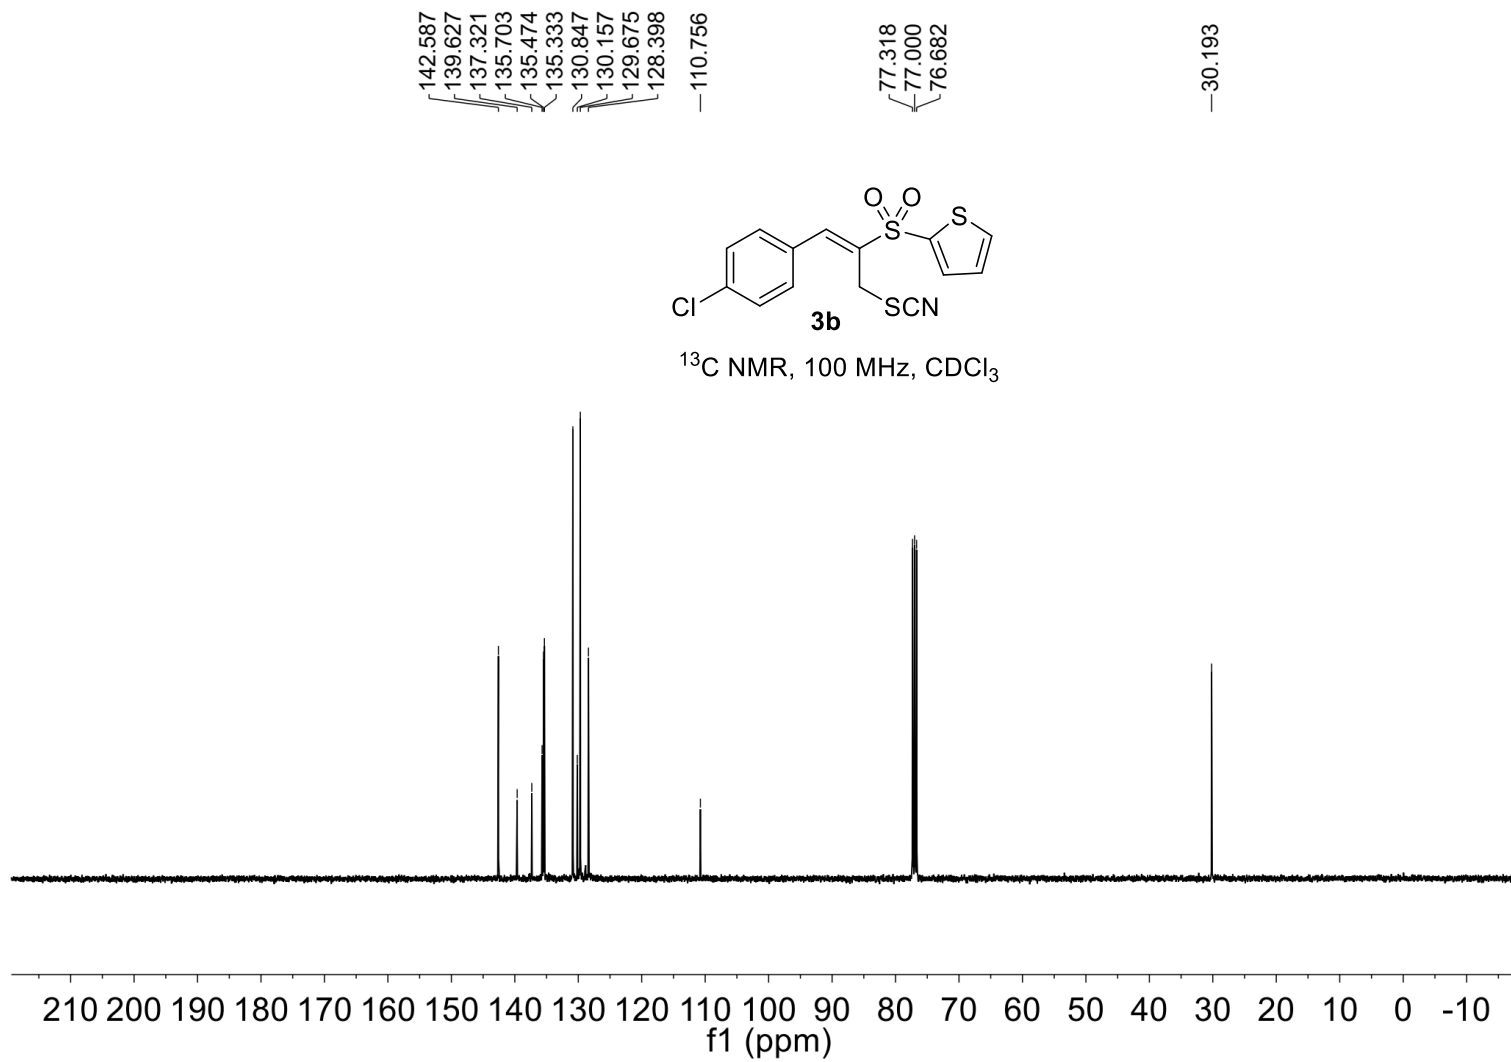

8.033  
7.826  
7.816  
7.811  
7.806  
7.454  
7.444  
7.443  
7.401  
7.394  
7.389  
7.226  
7.222  
7.222  
7.212  
7.200

4.227

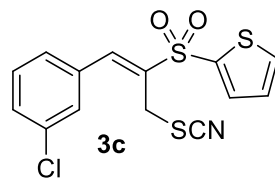

<sup>1</sup>H NMR, 400 MHz, CDCl<sub>3</sub>

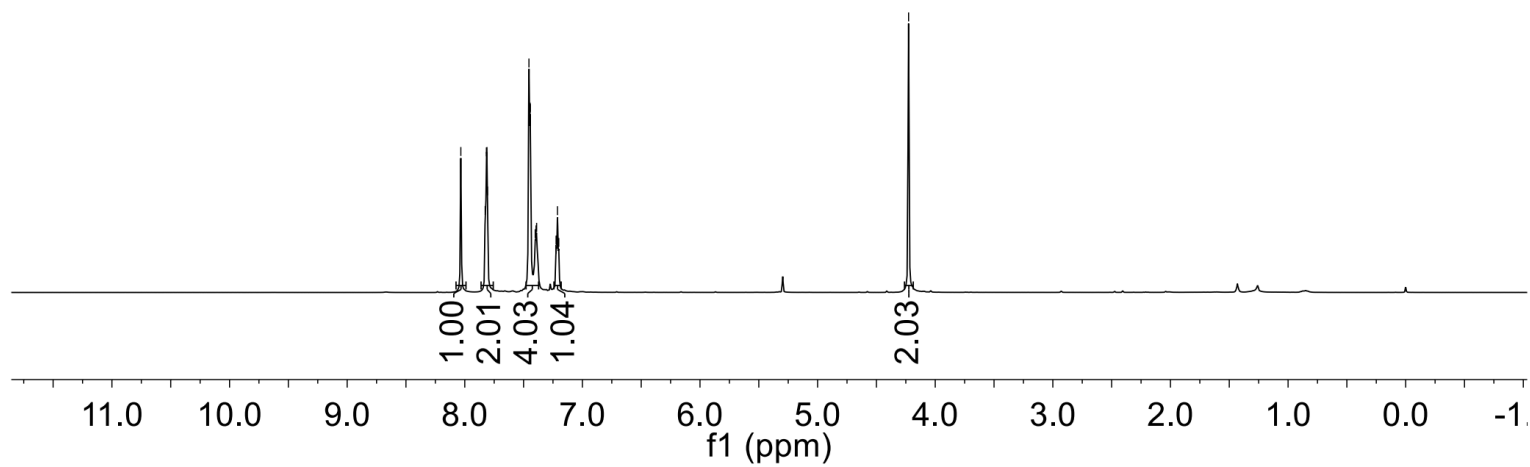

142.261  
139.345  
136.837  
135.590  
135.395  
135.224  
133.401  
130.767  
130.544  
129.303  
128.397  
127.199  
110.642

77.319  
77.000  
76.682

29.915

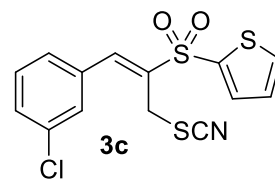

<sup>13</sup>C NMR, 100 MHz, CDCl<sub>3</sub>

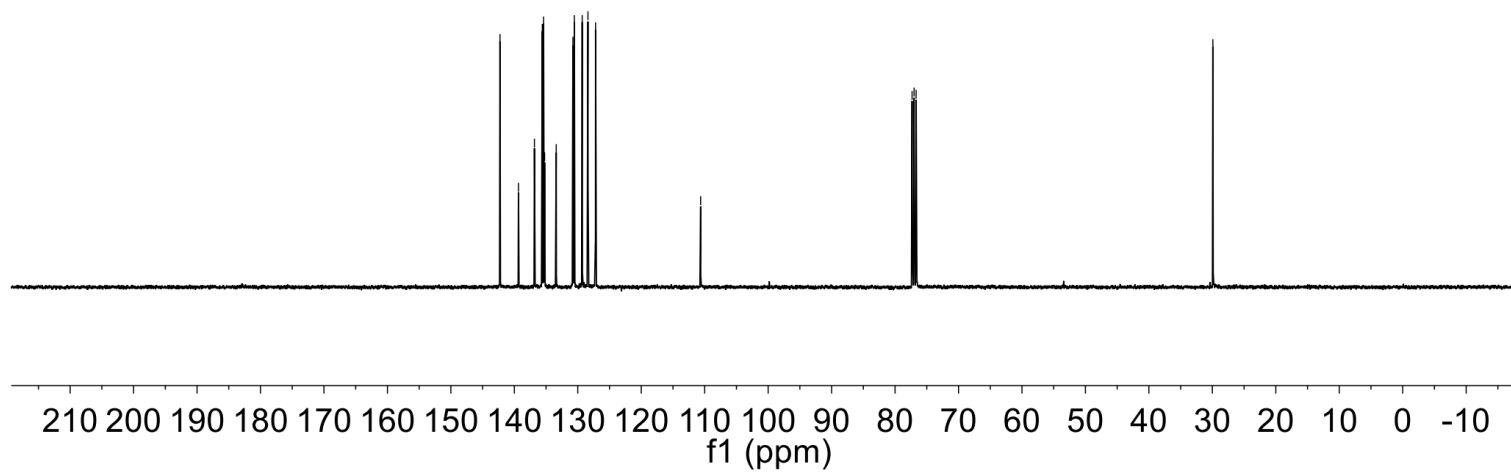

8.197  
7.819  
7.816  
7.807  
7.803  
7.491  
7.481  
7.468  
7.434  
7.423  
7.412  
7.400  
7.390  
7.387  
7.260  
7.215  
7.212  
7.203  
7.193  
7.190

4.083

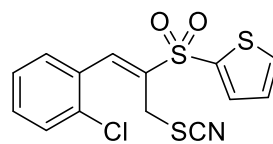

**3d**

<sup>1</sup>H NMR, 400 MHz, CDCl<sub>3</sub>

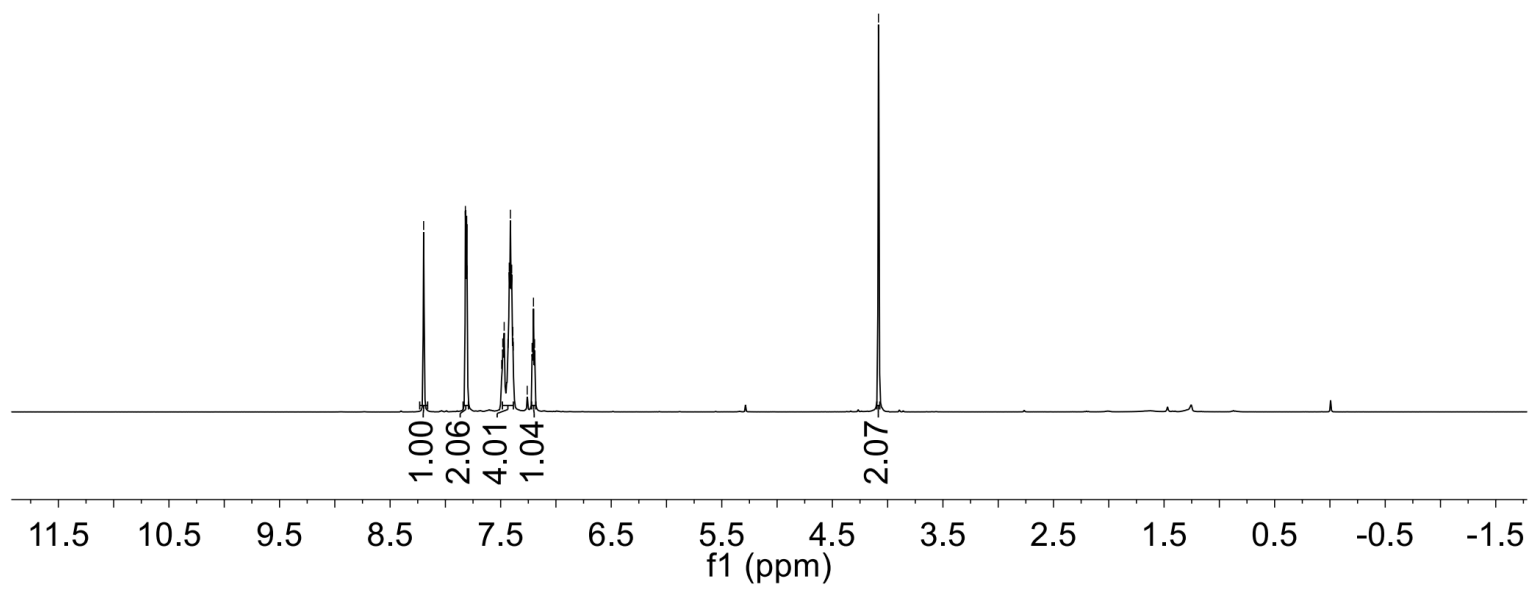

141.565  
139.544  
138.394  
135.573  
135.346  
134.368  
131.590  
130.598  
130.189  
129.241  
128.341  
127.391  
— 110.842

77.319  
77.000  
76.683

— 29.902

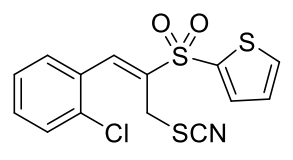

**3d**

<sup>13</sup>C NMR, 100 MHz, CDCl<sub>3</sub>

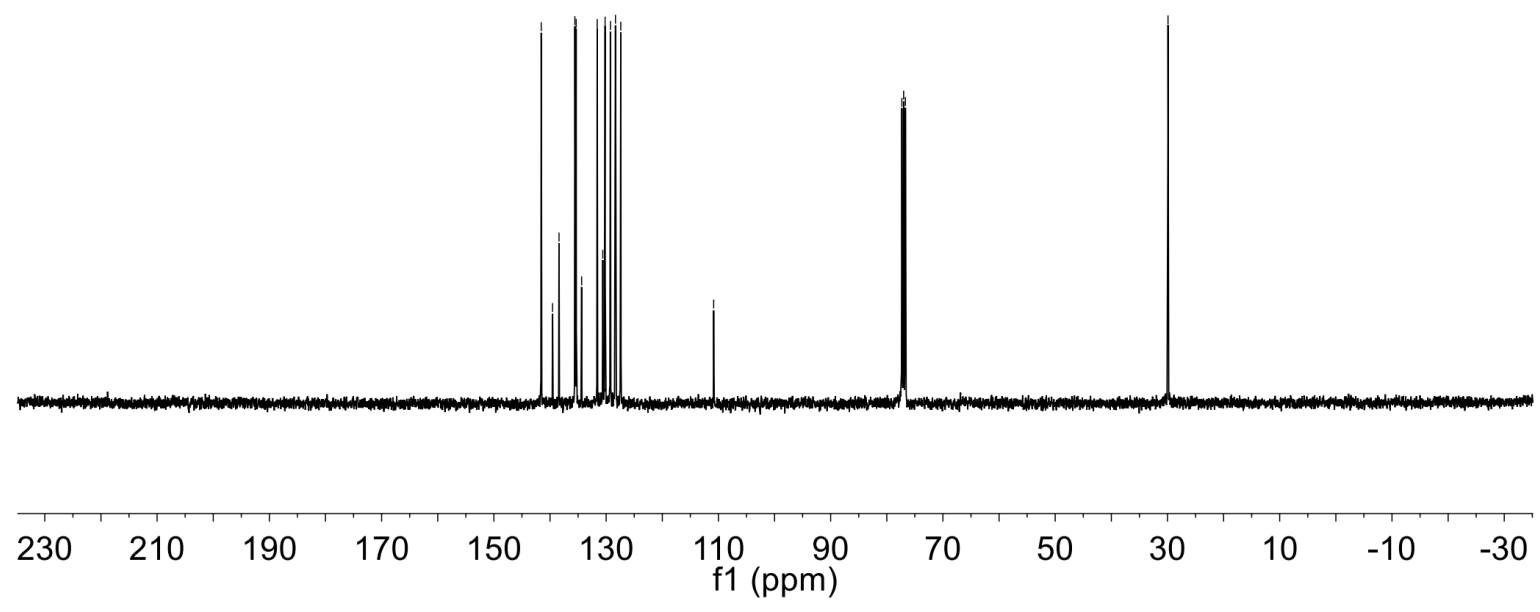

8.026  
8.025  
8.022  
7.810  
7.805  
7.799  
7.795  
7.794  
7.653  
7.648  
7.631  
7.631  
7.626  
7.381  
7.376  
7.359  
7.354  
7.260  
7.217  
7.216  
7.212  
7.206  
7.205  
7.201  
7.195  
7.191  
7.190  
-4.234

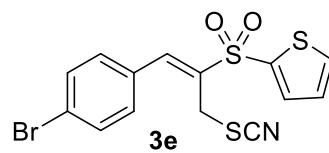

<sup>1</sup>H NMR, 400 MHz, CDCl<sub>3</sub>

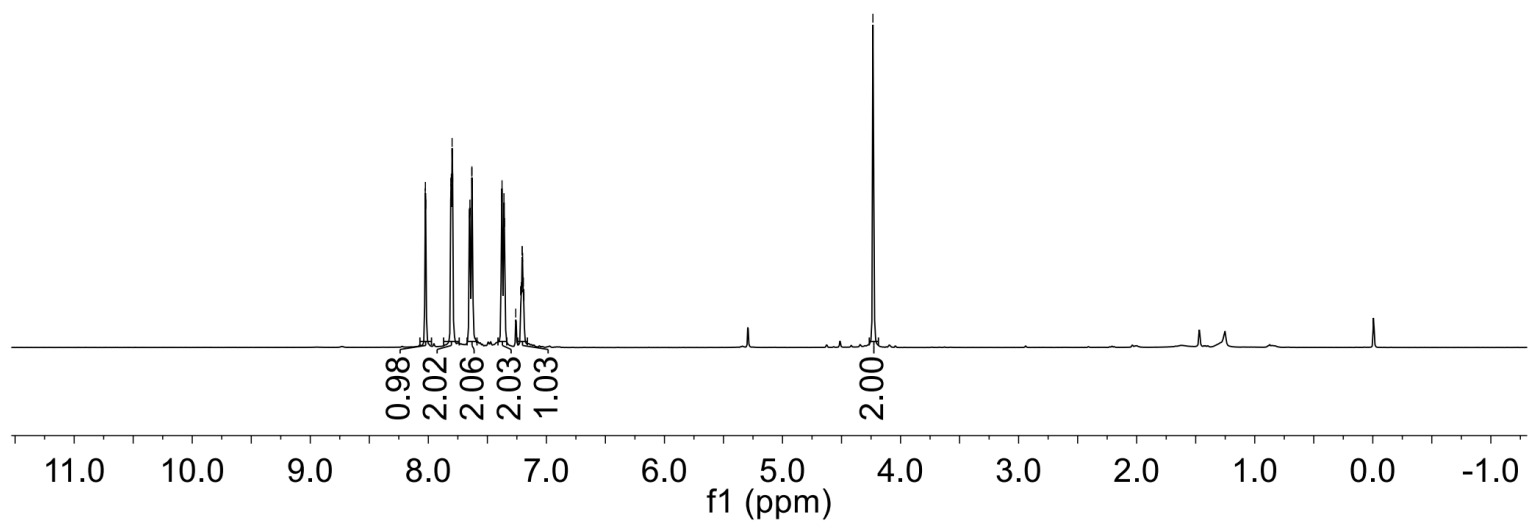

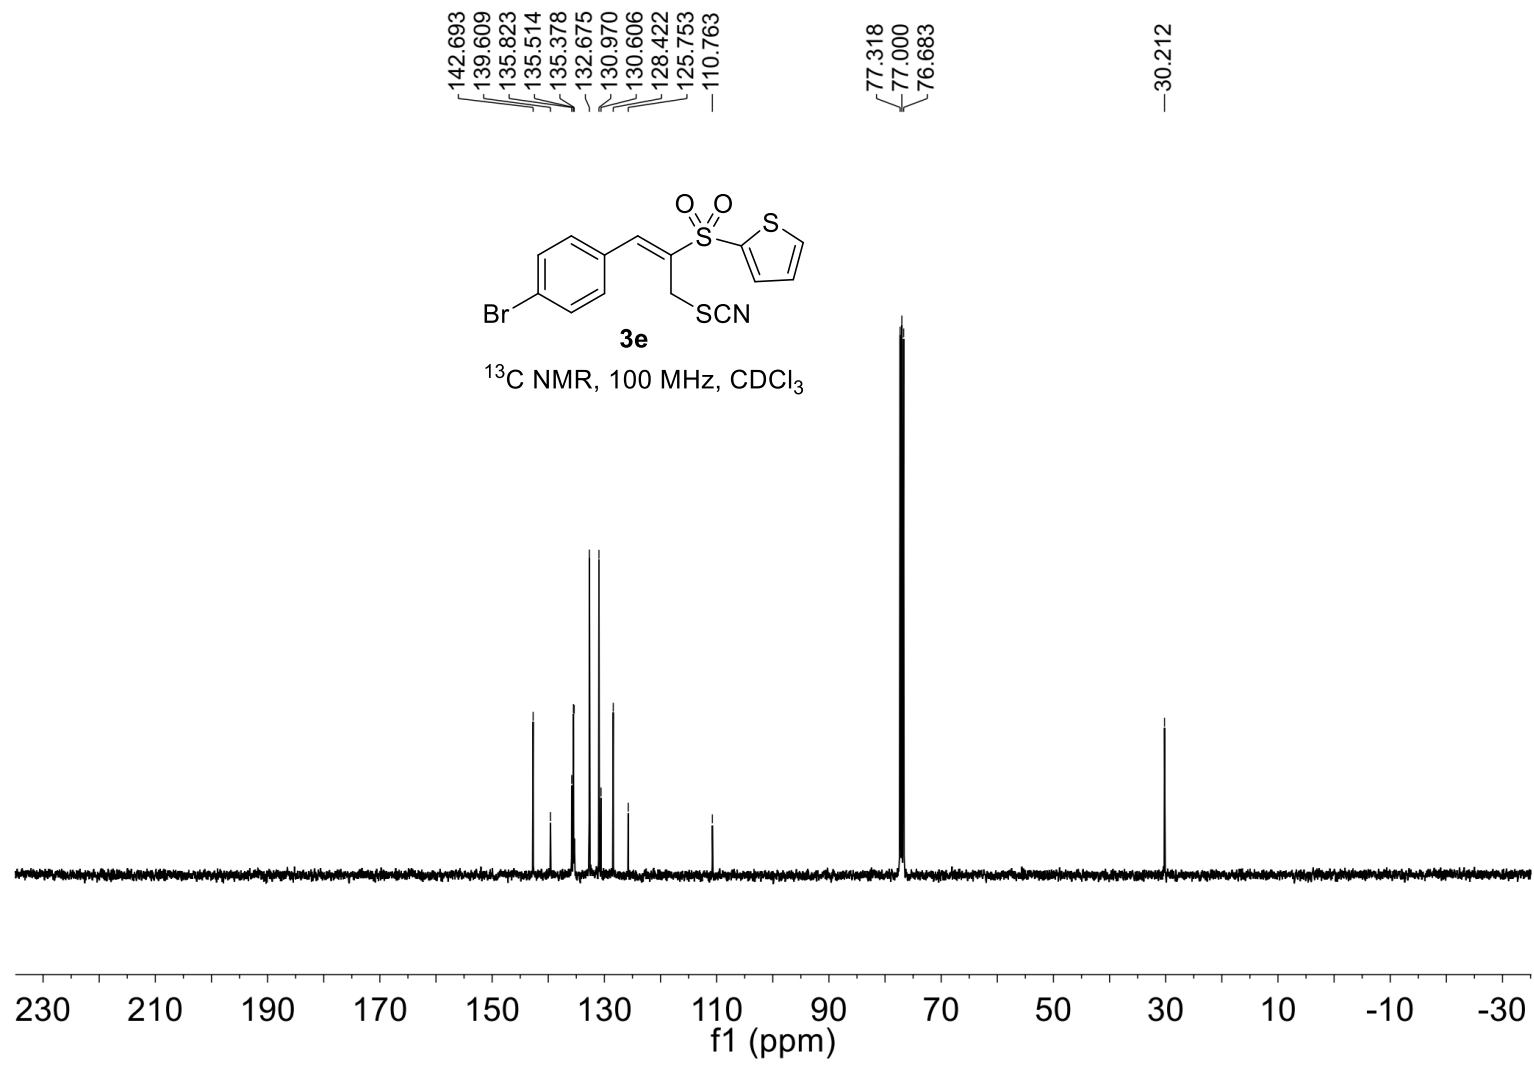

8.133  
7.837  
7.833  
7.822  
7.770  
7.750  
7.611  
7.591  
7.235  
7.231  
7.224  
7.220  
7.209

4.206

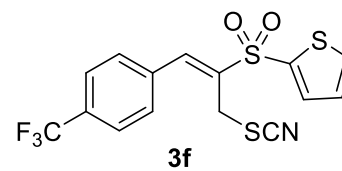

<sup>1</sup>H NMR, 400 MHz, CDCl<sub>3</sub>

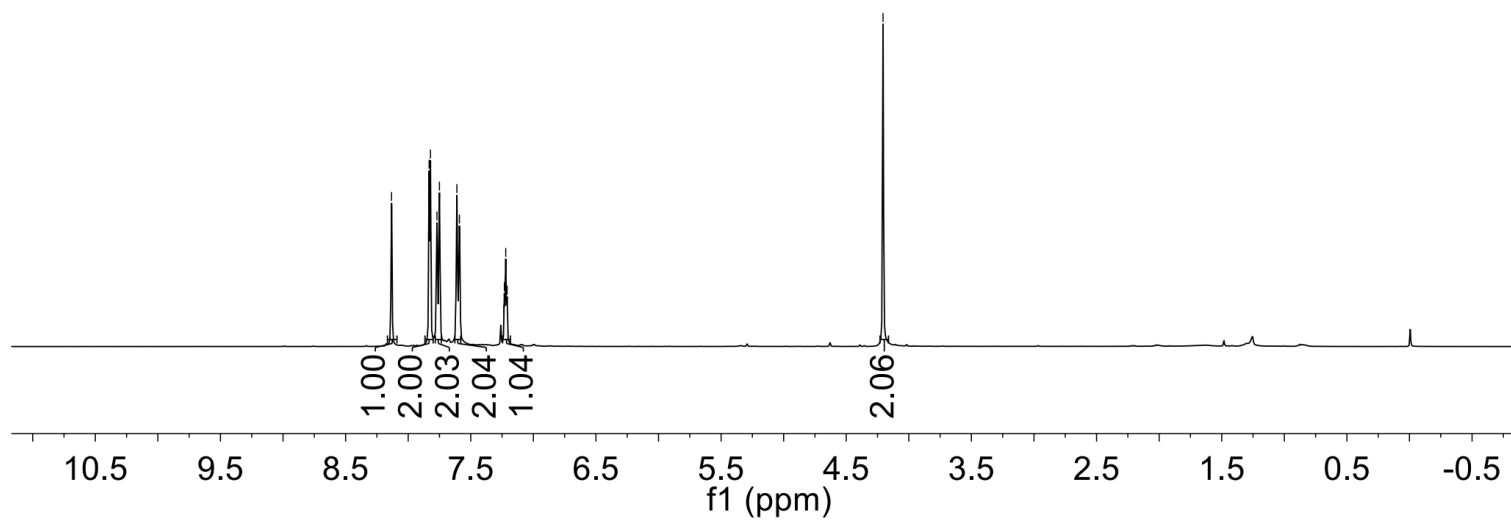

142.245  
139.383  
137.976  
135.765  
135.608  
135.280  
132.880  
132.552  
132.223  
131.895  
129.584  
128.496  
127.497  
126.312  
126.275  
126.238  
126.201  
124.789  
122.080  
119.370  
110.598

77.317  
77.000  
76.682

29.843

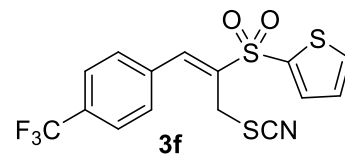

$^{13}\text{C}$  NMR, 100 MHz,  $\text{CDCl}_3$

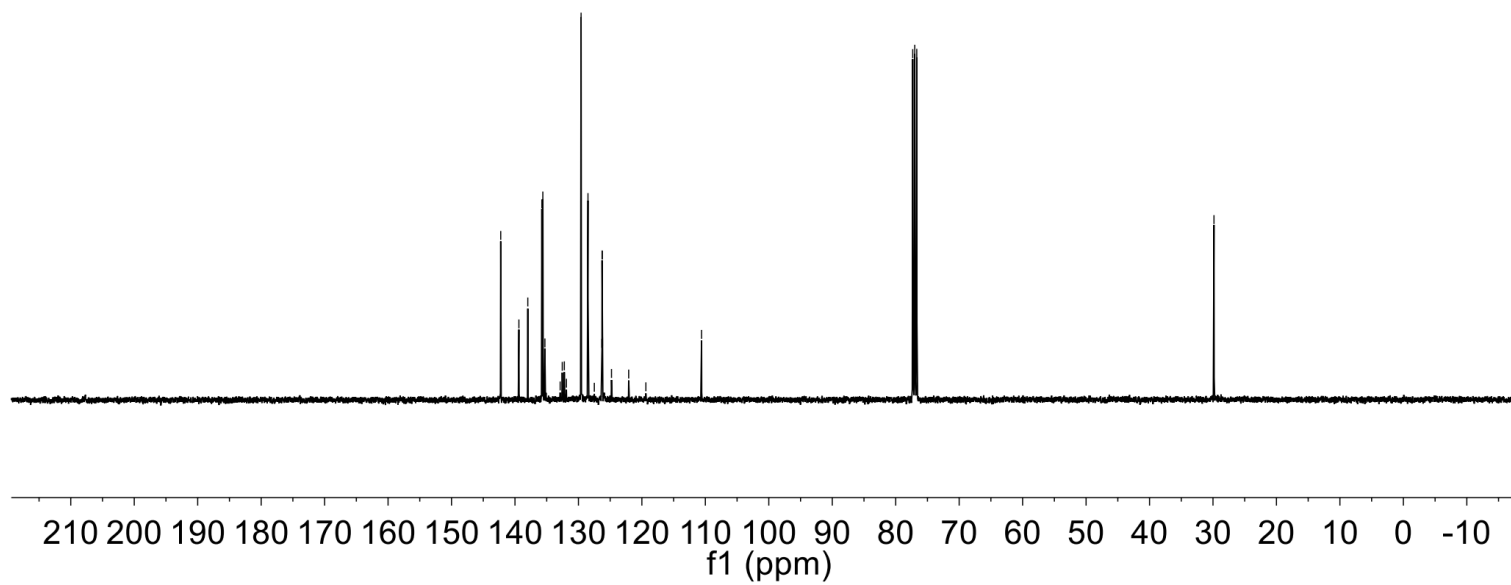

8.133  
7.827  
7.818  
7.798  
7.785  
7.755  
7.751  
7.733  
7.638  
7.619  
7.598  
7.598  
7.497  
7.478  
7.460  
7.424  
7.406  
7.260  
7.215  
7.204  
7.204  
7.192

4.347

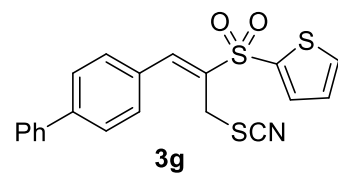

<sup>1</sup>H NMR, 400 MHz, CDCl<sub>3</sub>

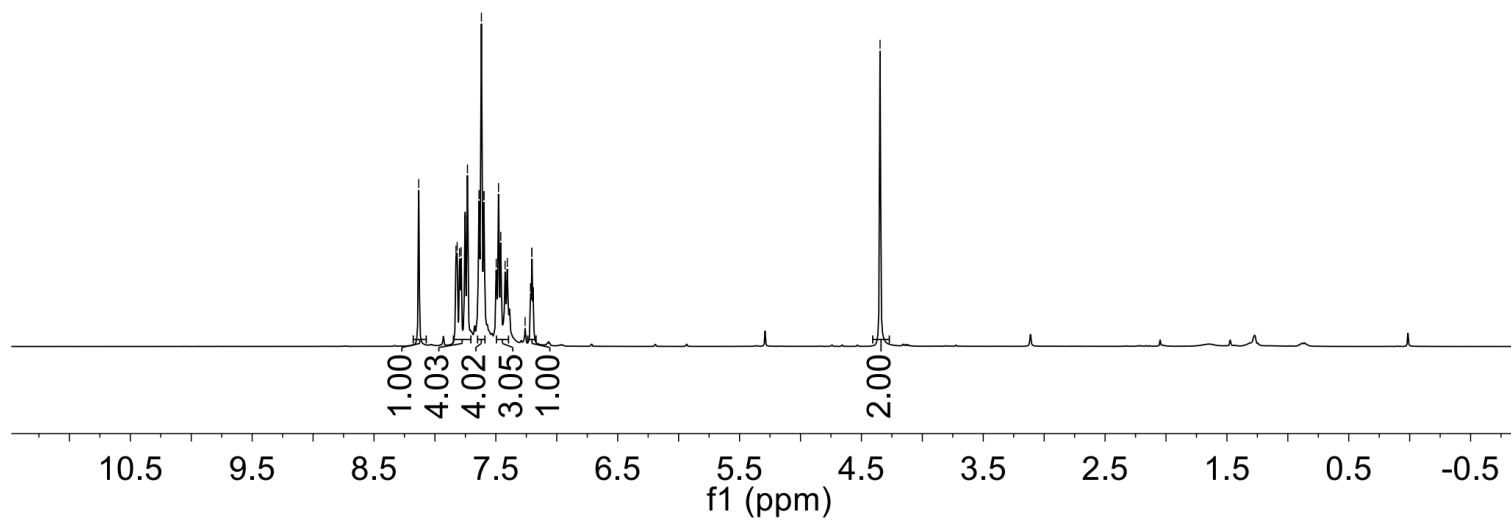

143.854  
143.541  
139.920  
139.318  
135.239  
135.138  
134.422  
130.517  
130.372  
128.954  
128.318  
128.257  
127.860  
127.039  
111.017

77.318  
77.000  
76.683

30.637

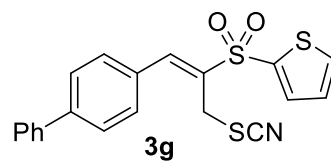

<sup>13</sup>C NMR, 100 MHz, CDCl<sub>3</sub>

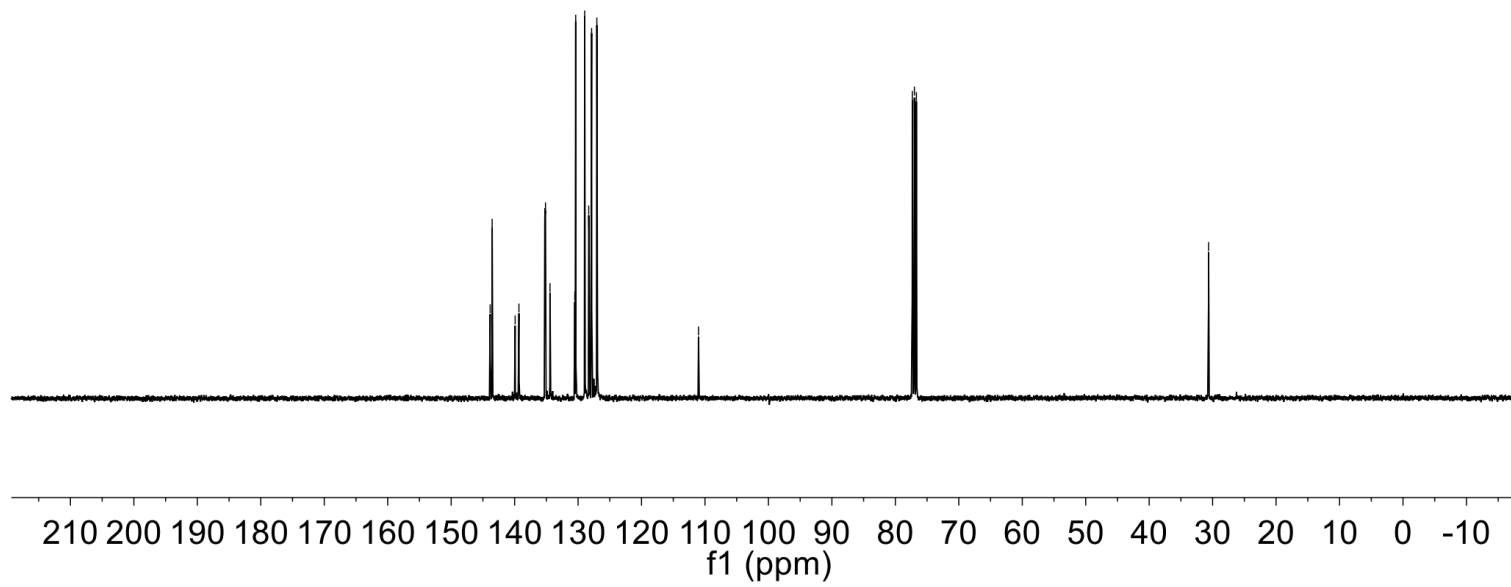

8.049  
8.042  
8.041  
7.789  
7.780  
7.771  
7.770  
7.759  
7.427  
7.418  
7.418  
7.406  
7.398  
7.315  
7.307  
7.295  
7.295  
7.287  
7.260  
7.195  
7.185  
7.175  
7.175  
7.164

4.297

2.402

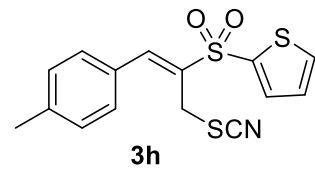

<sup>1</sup>H NMR, 400 MHz, CDCl<sub>3</sub>

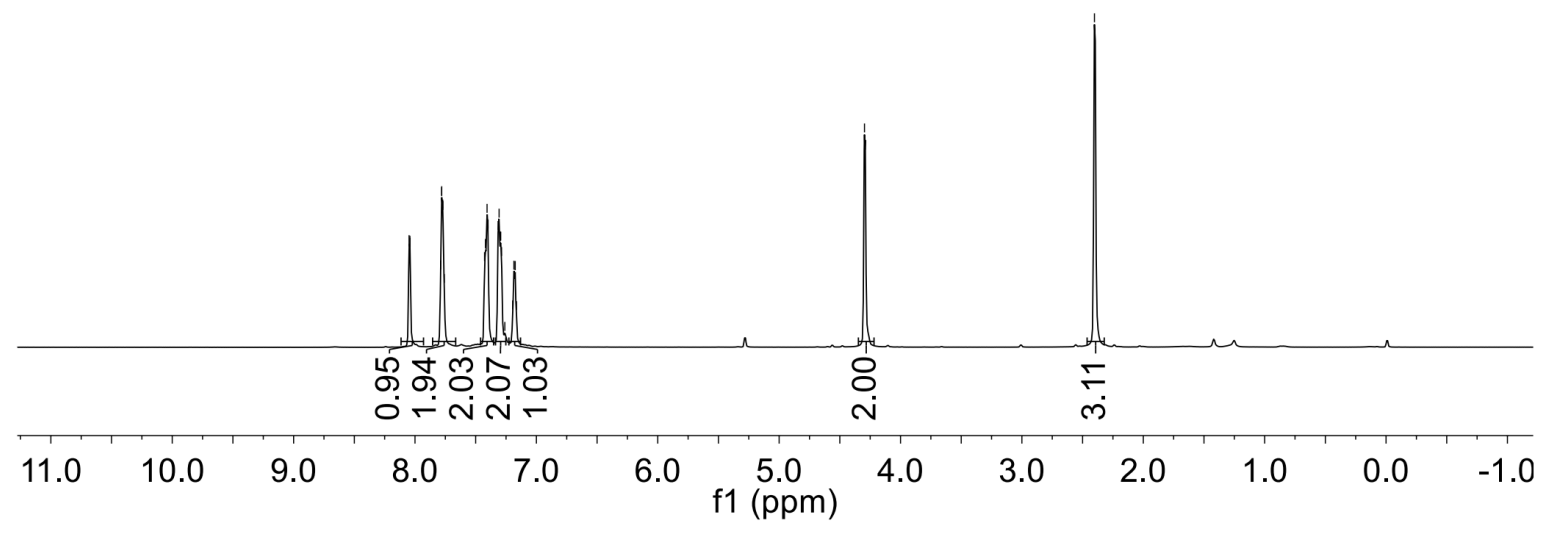

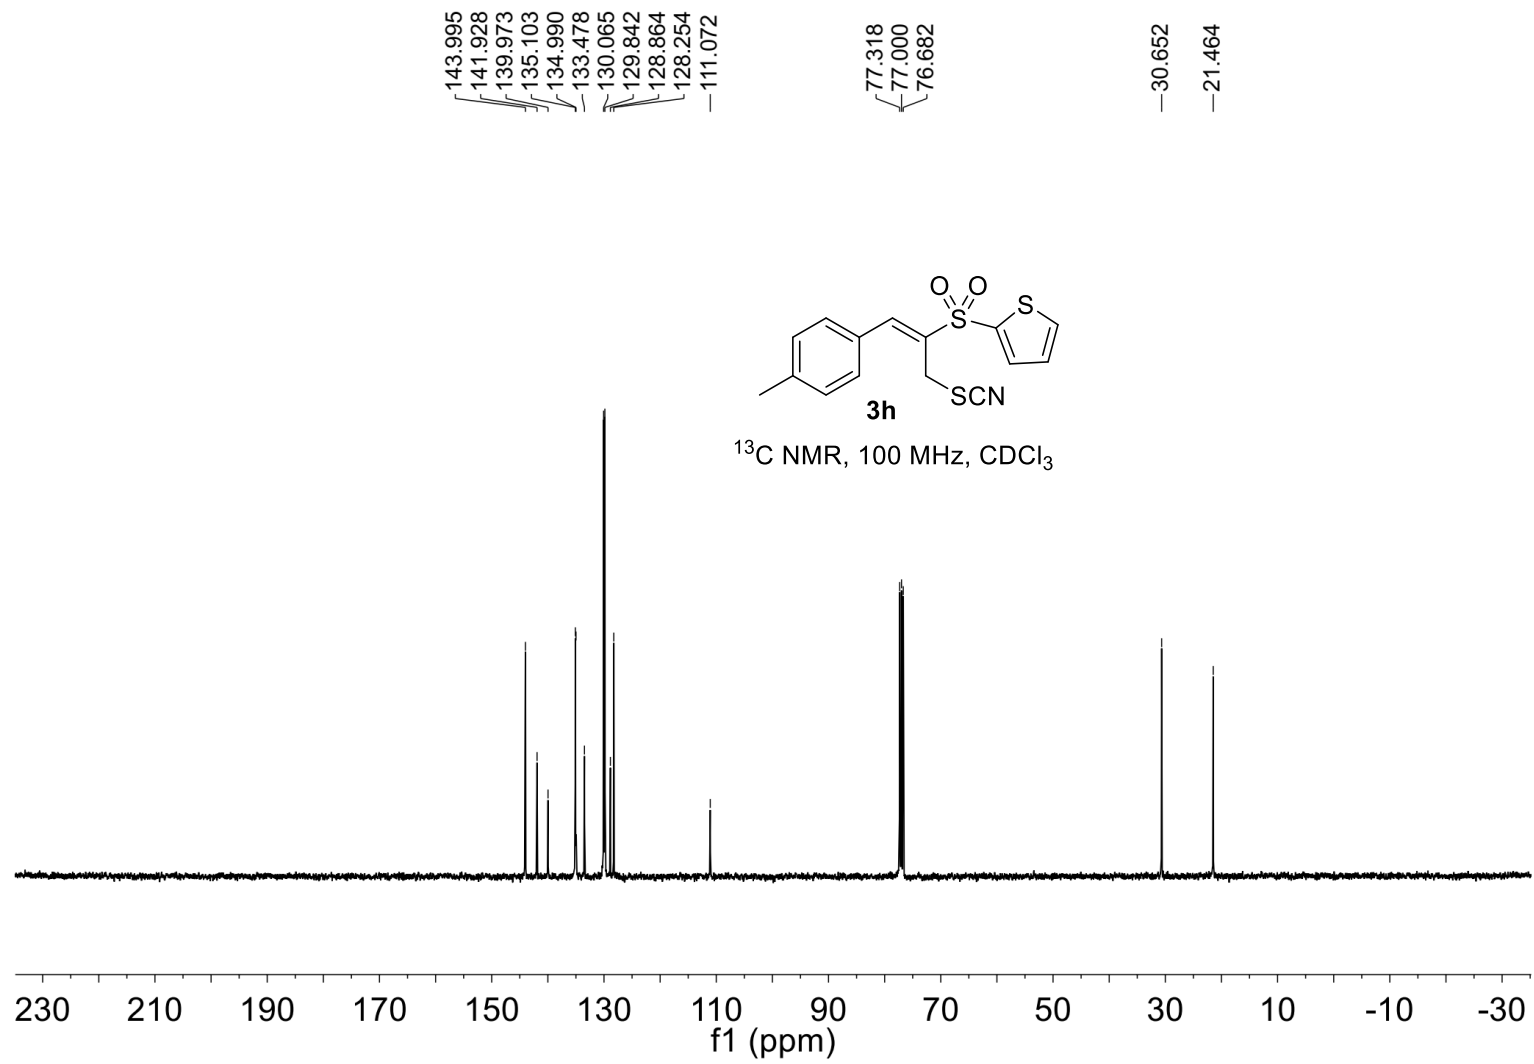

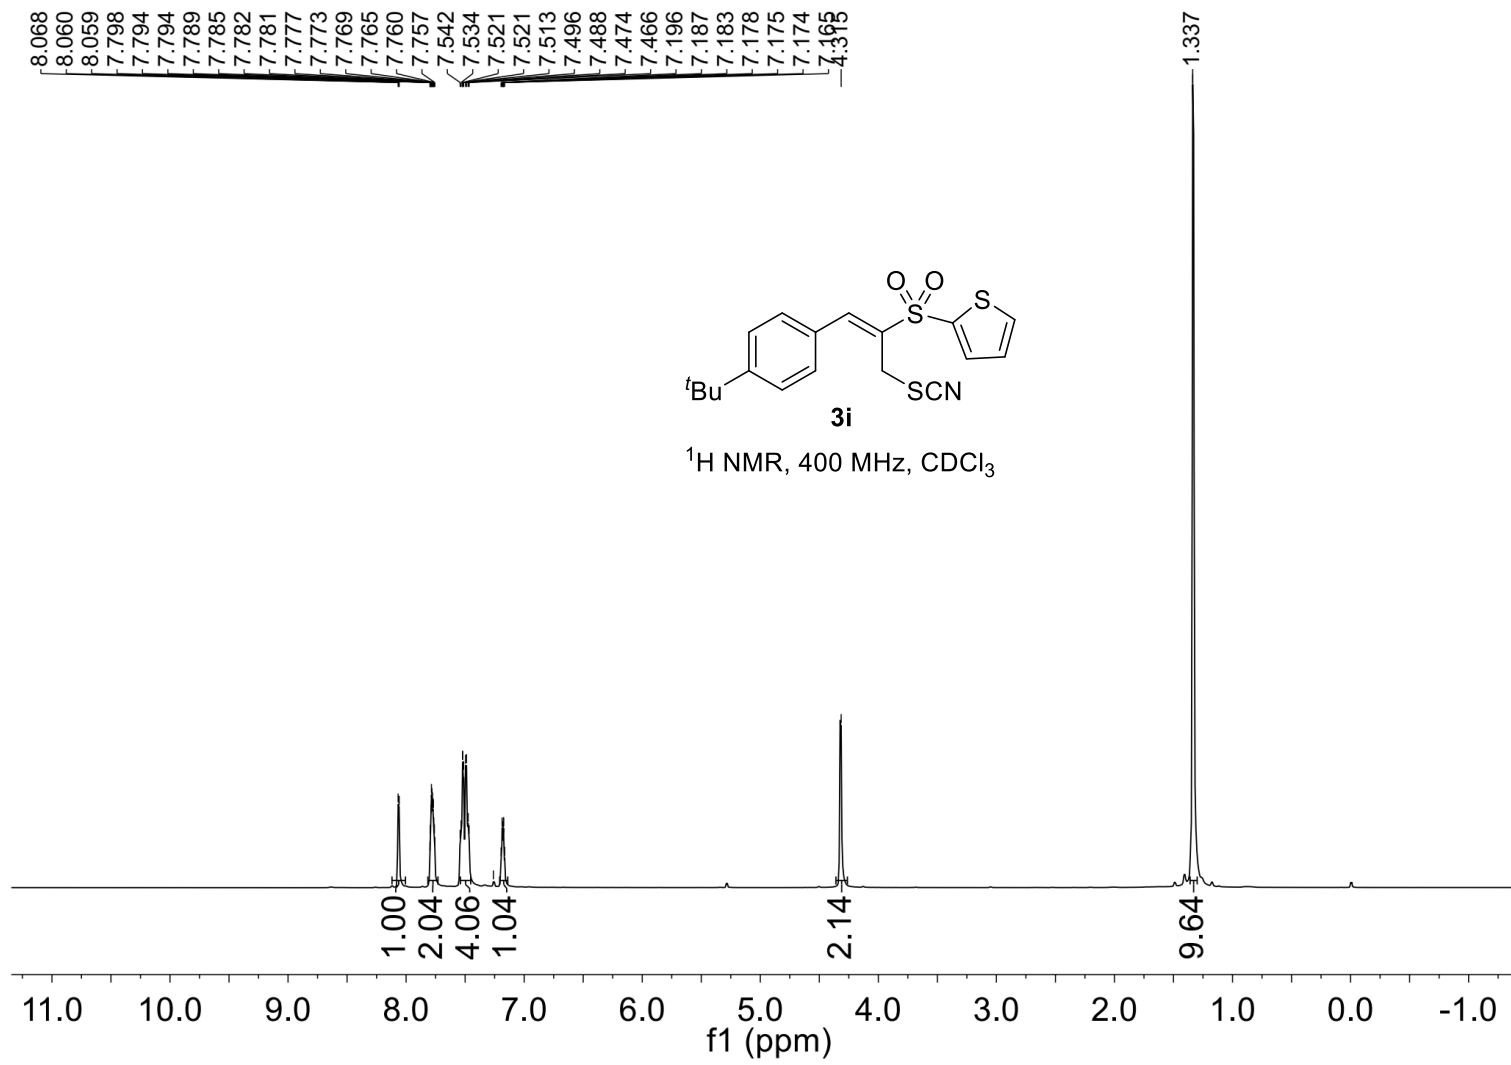

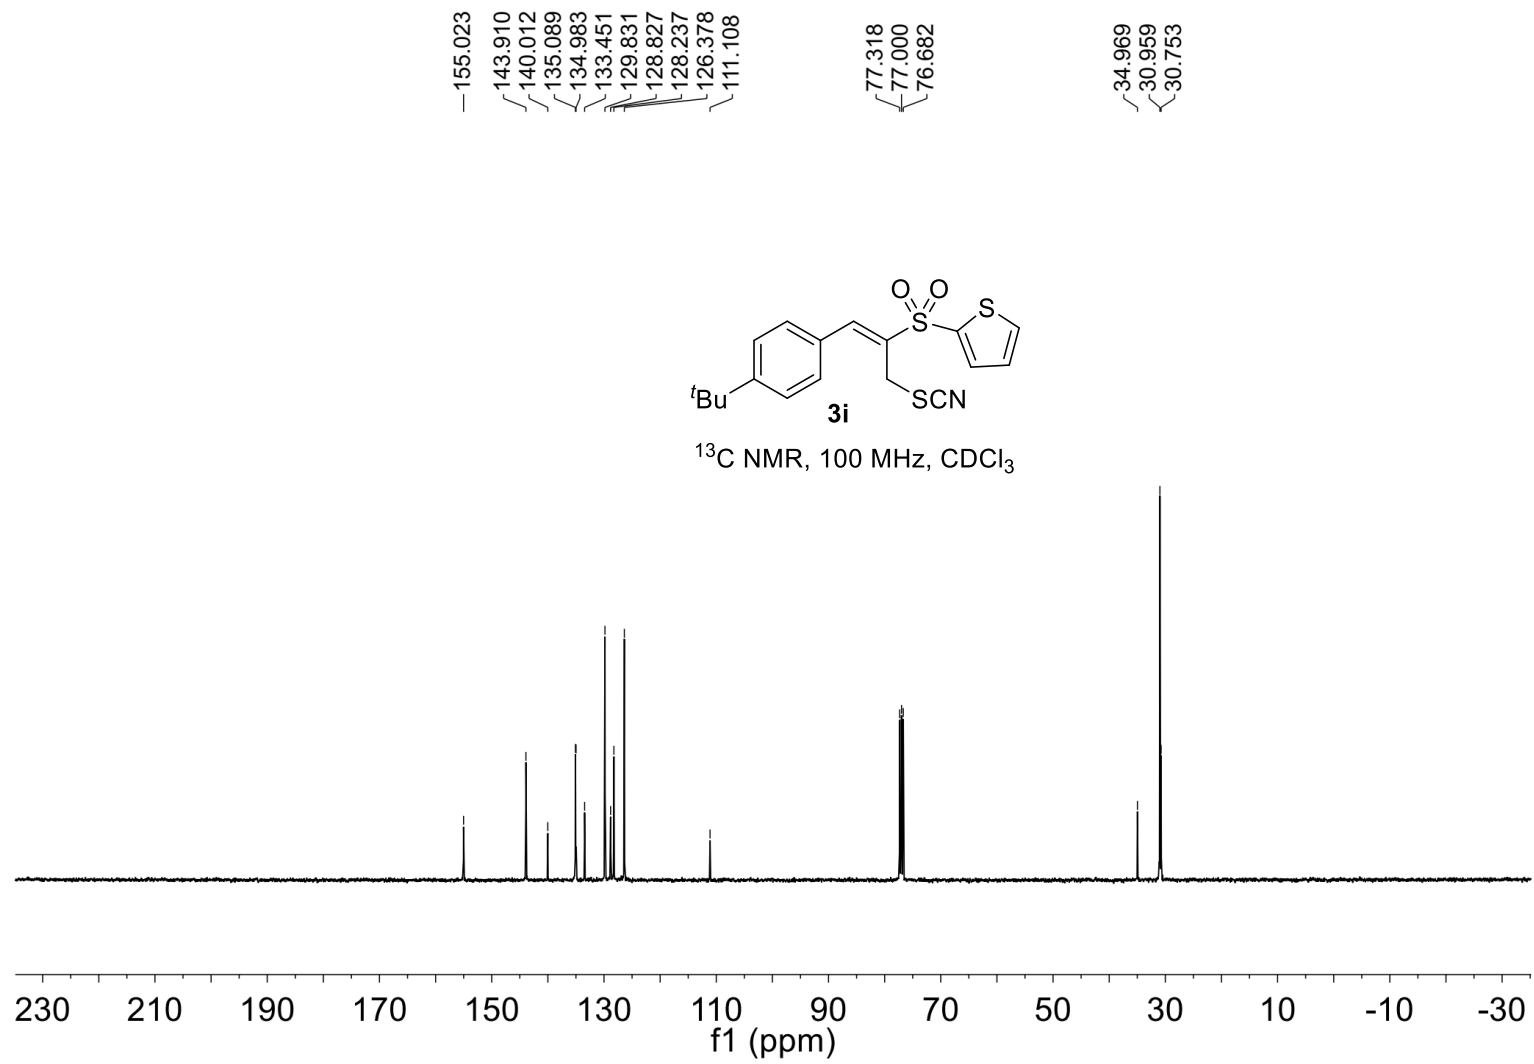

8.004  
7.779  
7.775  
7.768  
7.761  
7.760  
7.756  
7.748  
7.525  
7.518  
7.503  
7.503  
7.496  
7.260  
7.188  
7.179  
7.171  
7.167  
7.159  
7.026  
7.019  
7.004  
7.003  
6.996

4.338  
3.863

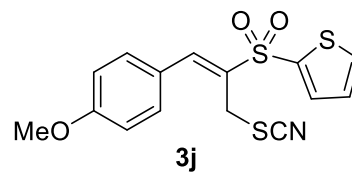

<sup>1</sup>H NMR, 400 MHz, CDCl<sub>3</sub>

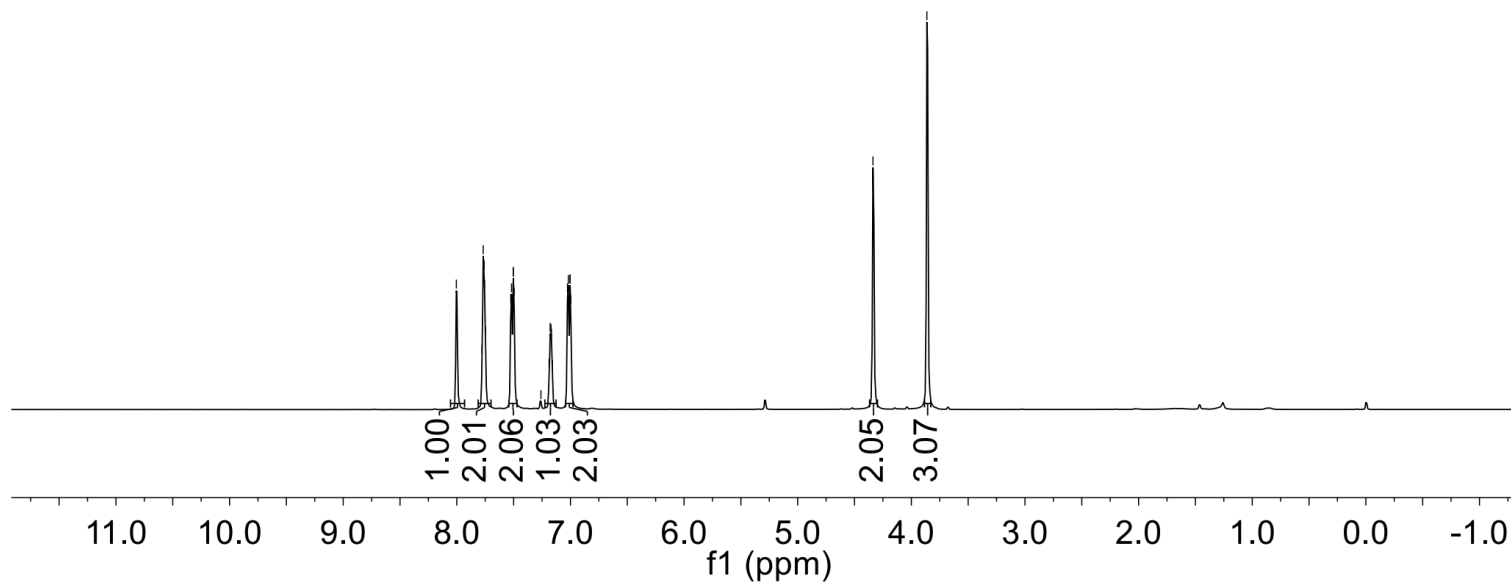

—162.042  
143.539  
140.310  
134.867  
134.770  
132.158  
131.366  
128.198  
124.106  
—114.902  
—111.123  
77.318  
77.000  
76.682  
—55.460  
—31.003

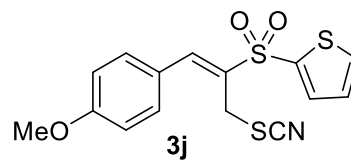

$^{13}\text{C}$  NMR, 100 MHz,  $\text{CDCl}_3$

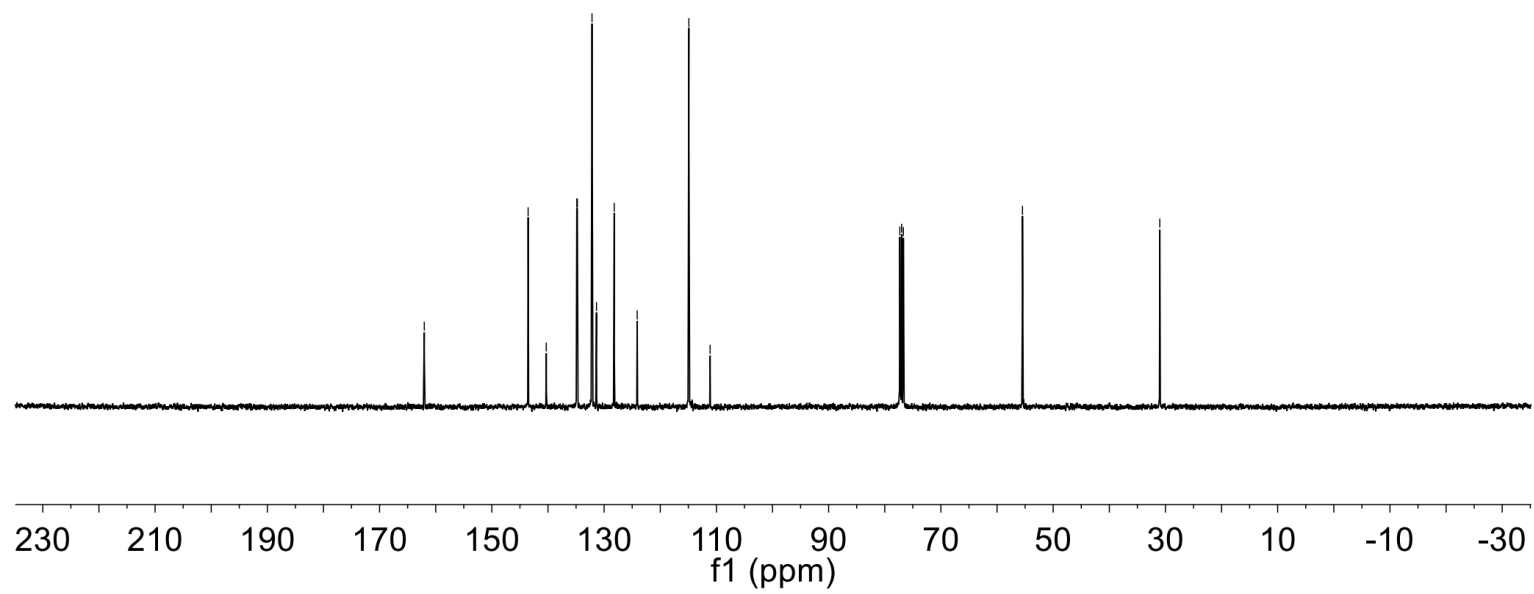

8.247  
8.049  
7.961  
7.940  
7.940  
7.887  
7.882  
7.864  
7.839  
7.836  
7.830  
7.826  
7.805  
7.802  
7.793  
7.790  
7.618  
7.614  
7.601  
7.597  
7.590  
7.583  
7.574  
7.570  
7.567  
7.552  
7.548  
7.260  
7.221  
7.212  
7.209  
7.199  
7.199  
4.372

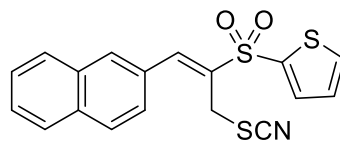

**3k**

$^1\text{H NMR}$ , 400 MHz,  $\text{CDCl}_3$

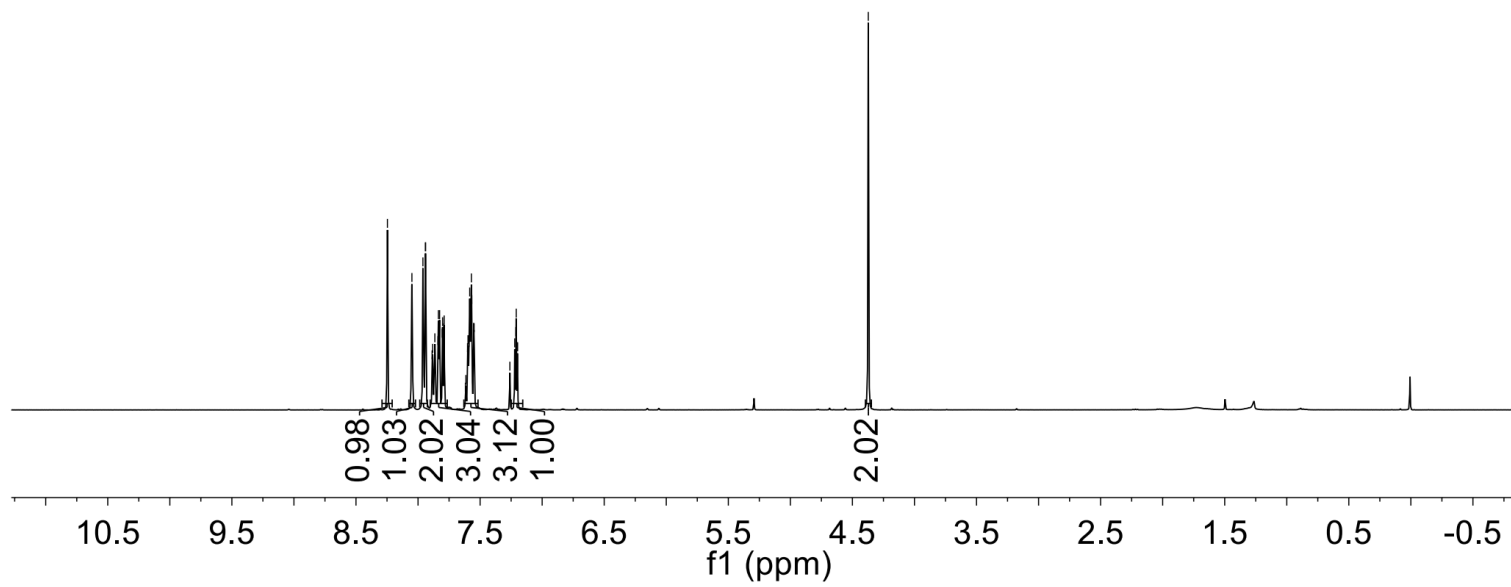

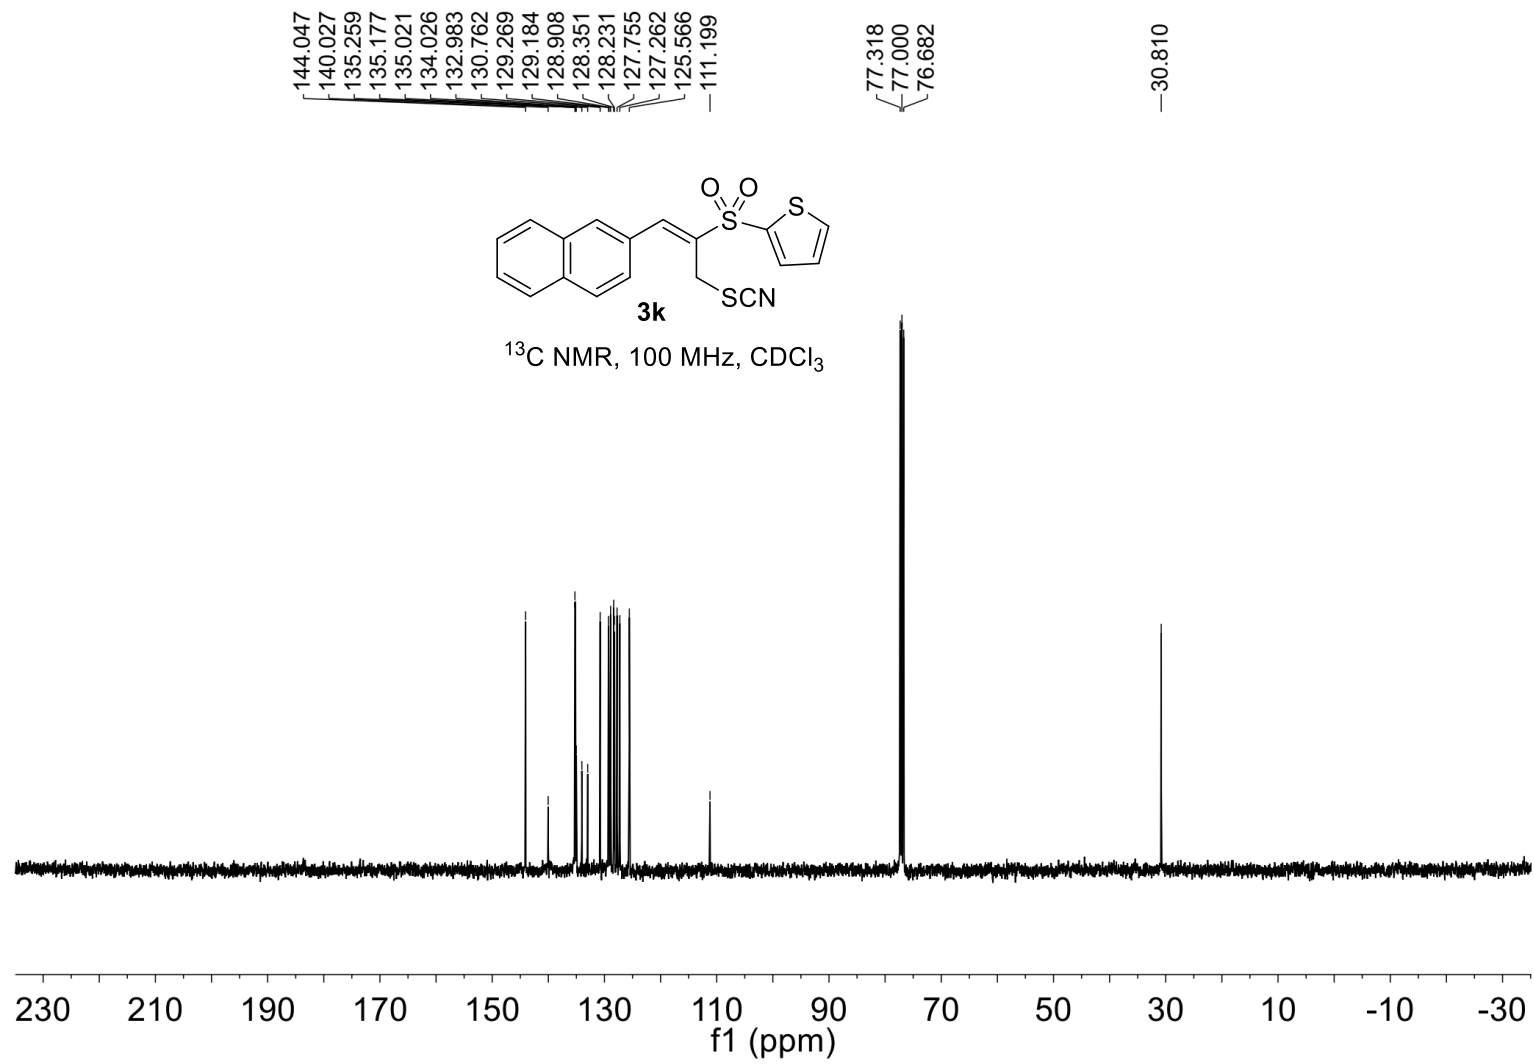

8.179  
7.770  
7.766  
7.761  
7.757  
7.753  
7.750  
7.738  
7.725  
7.513  
7.504  
7.503  
7.260  
7.224  
7.220  
7.211  
7.208  
7.202  
7.198  
7.184  
7.180  
7.171  
7.168  
7.162  
7.158  
-4.429

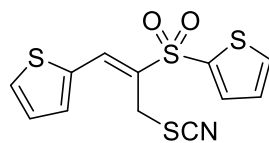

**3I**

<sup>1</sup>H NMR, 400 MHz, CDCl<sub>3</sub>

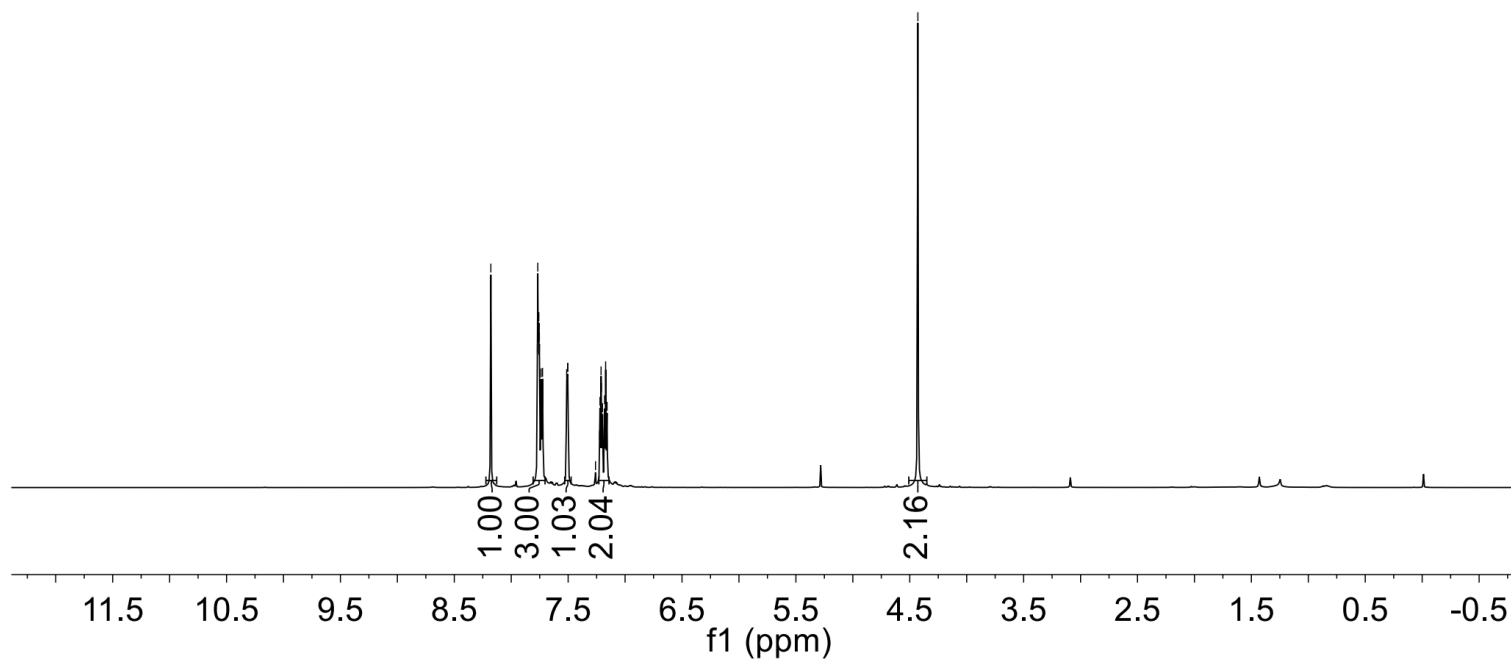

140.043  
136.139  
135.822  
135.037  
134.845  
134.225  
133.458  
129.632  
128.380  
128.278  
— 111.059

77.318  
77.000  
76.682

— 30.847

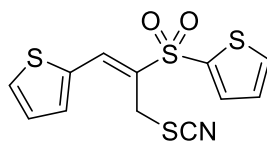

**3I**

<sup>13</sup>C NMR, 100 MHz, CDCl<sub>3</sub>

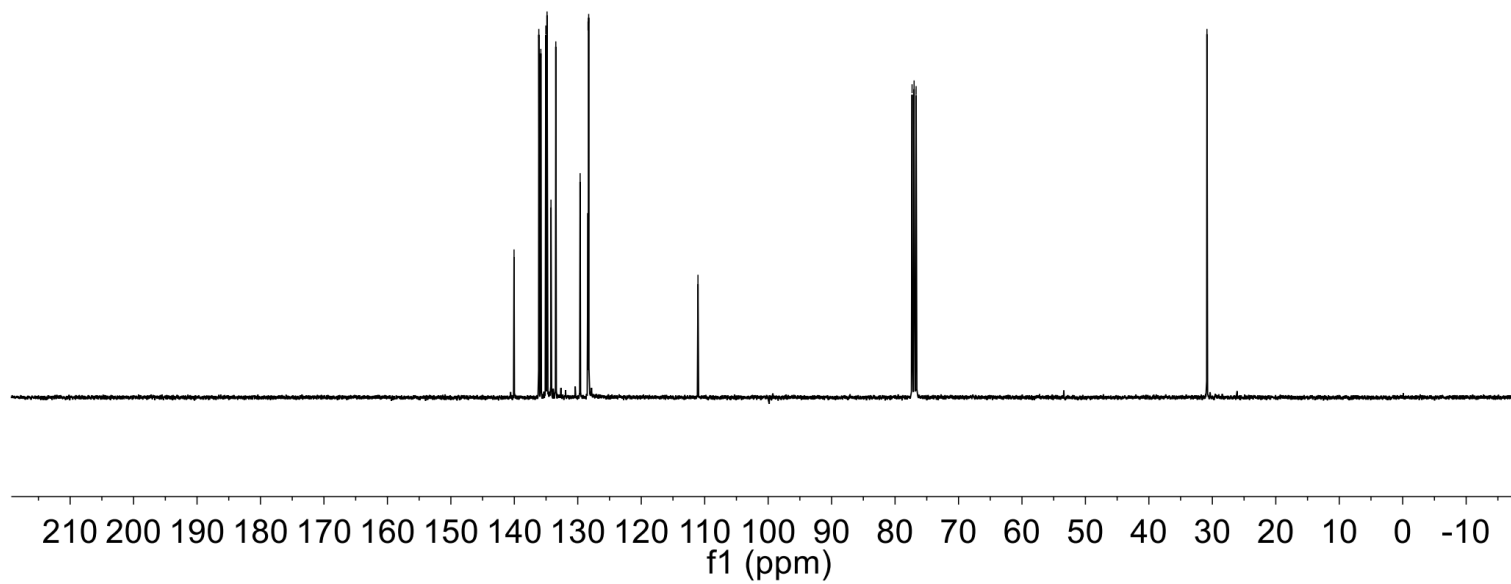

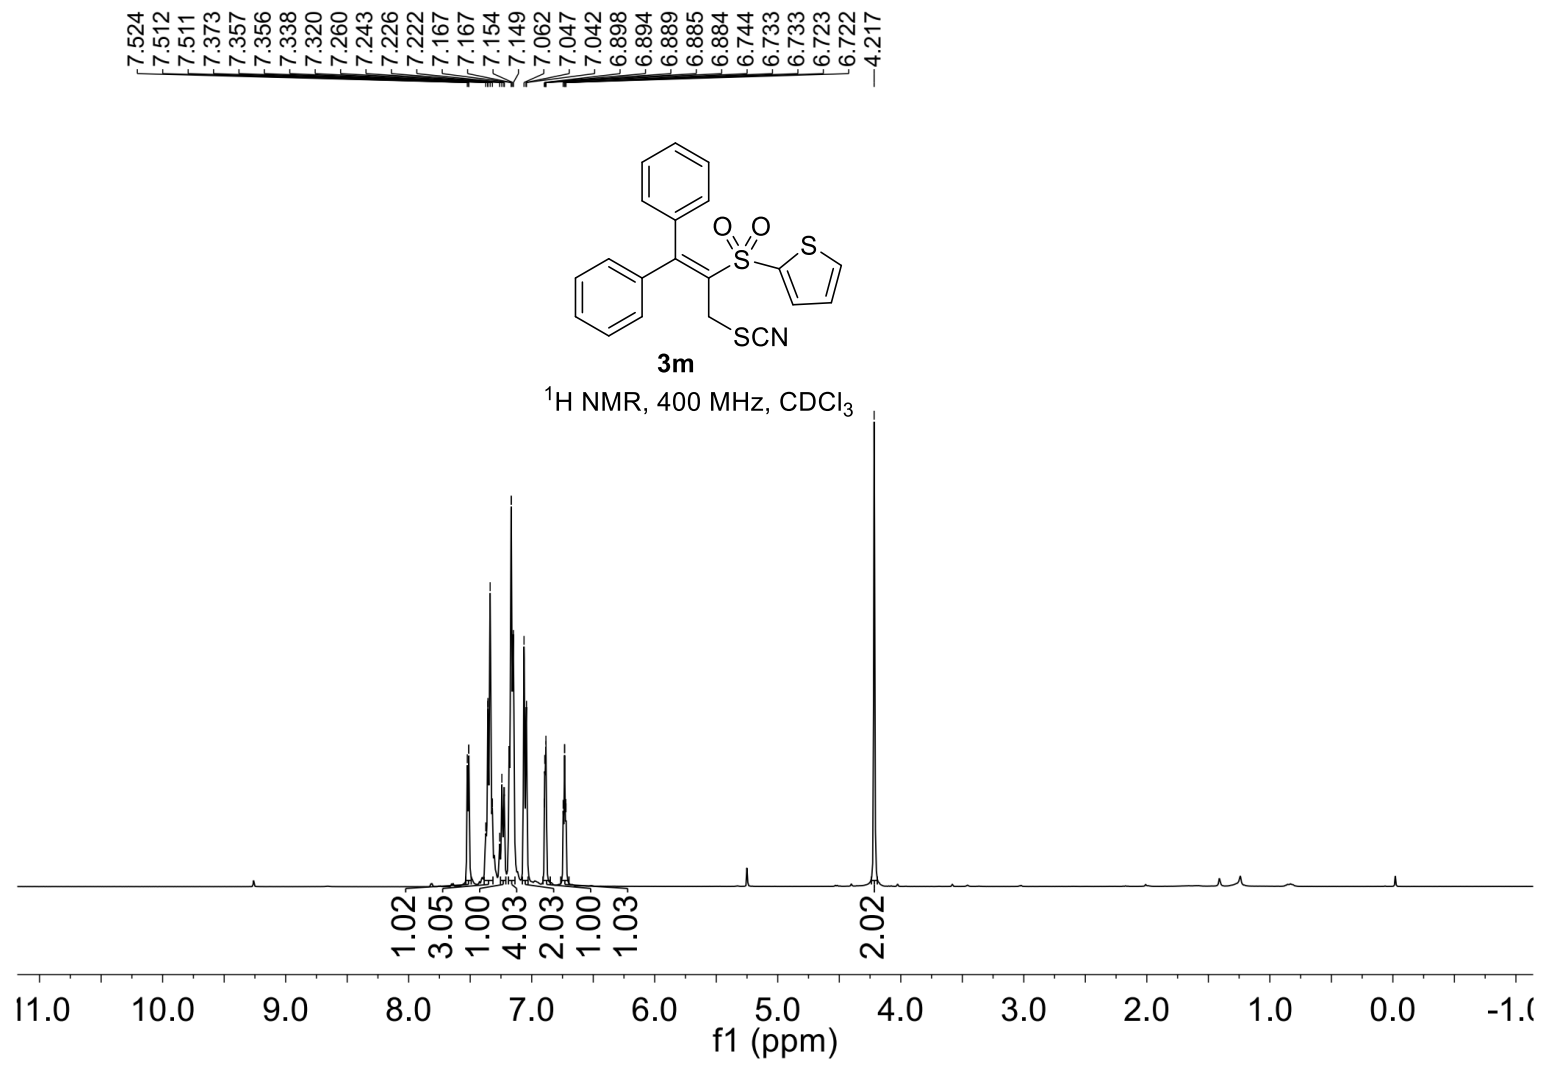

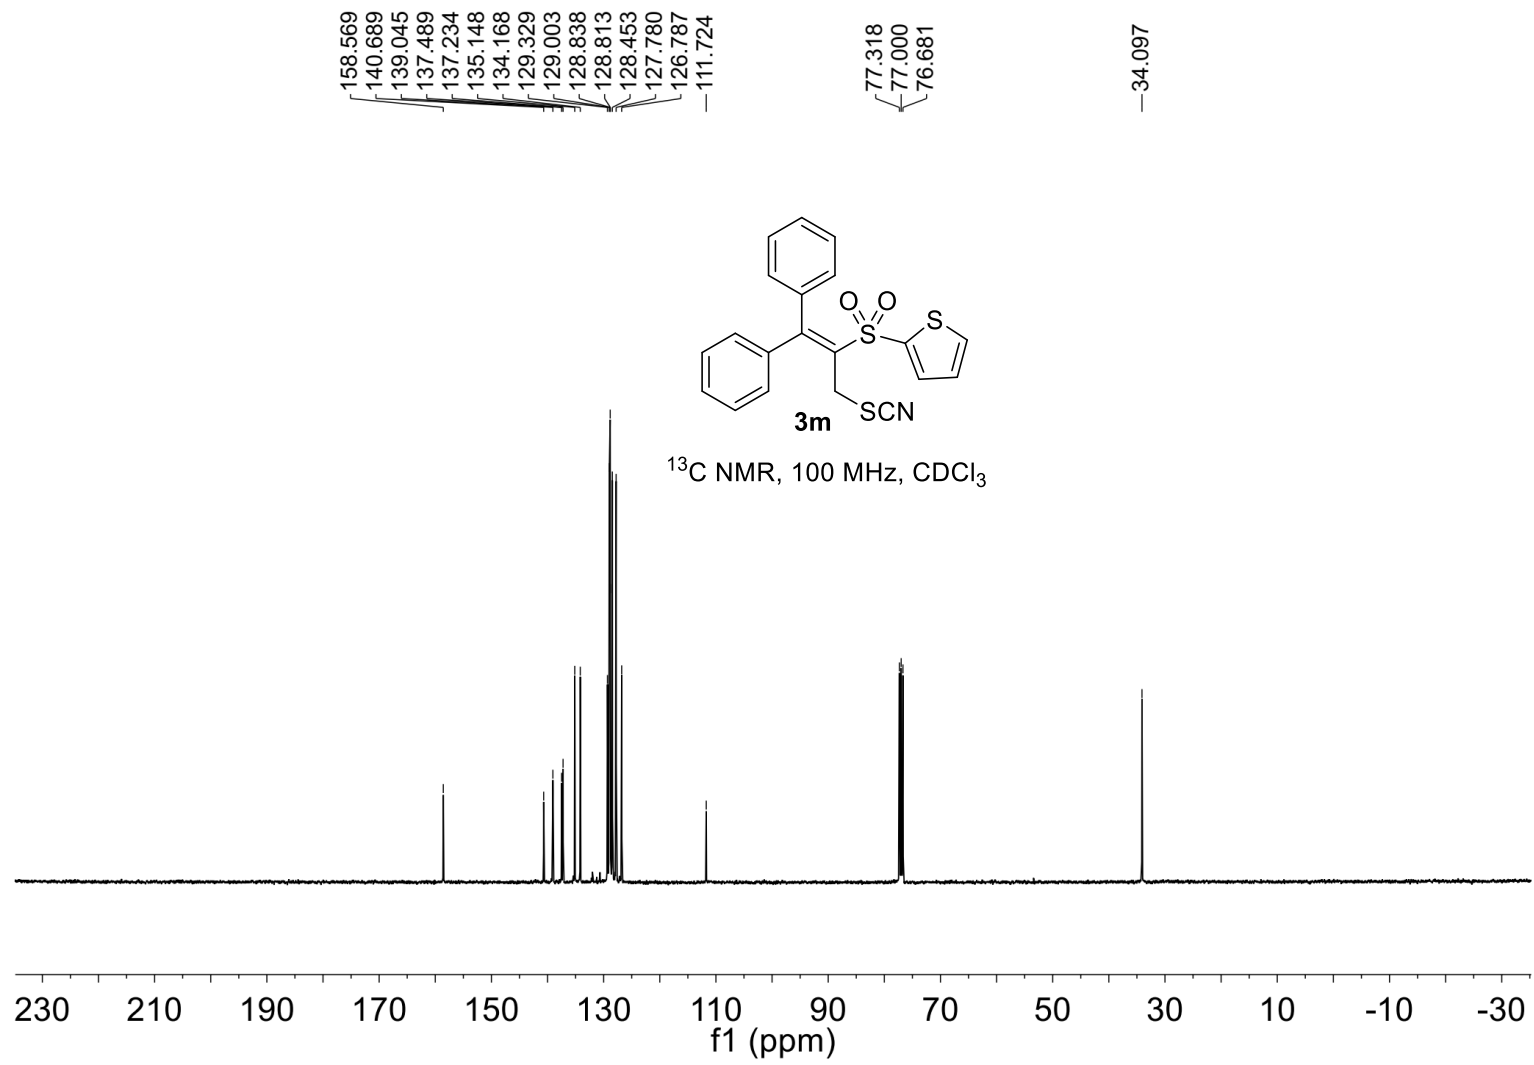

7.877  
7.873  
7.867  
7.859  
7.856  
7.789  
7.782  
7.777  
7.769  
7.768  
7.753  
7.447  
7.431  
7.431  
7.424  
7.413  
7.412  
7.404  
7.398  
7.395  
7.391  
7.390  
7.380  
7.373  
7.362  
7.354  
7.208  
7.199  
7.187  
7.183  
7.178  
7.167  
7.163  
7.158  
-3.988

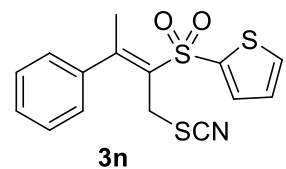

<sup>1</sup>H NMR, 400 MHz, CDCl<sub>3</sub>

-2.534

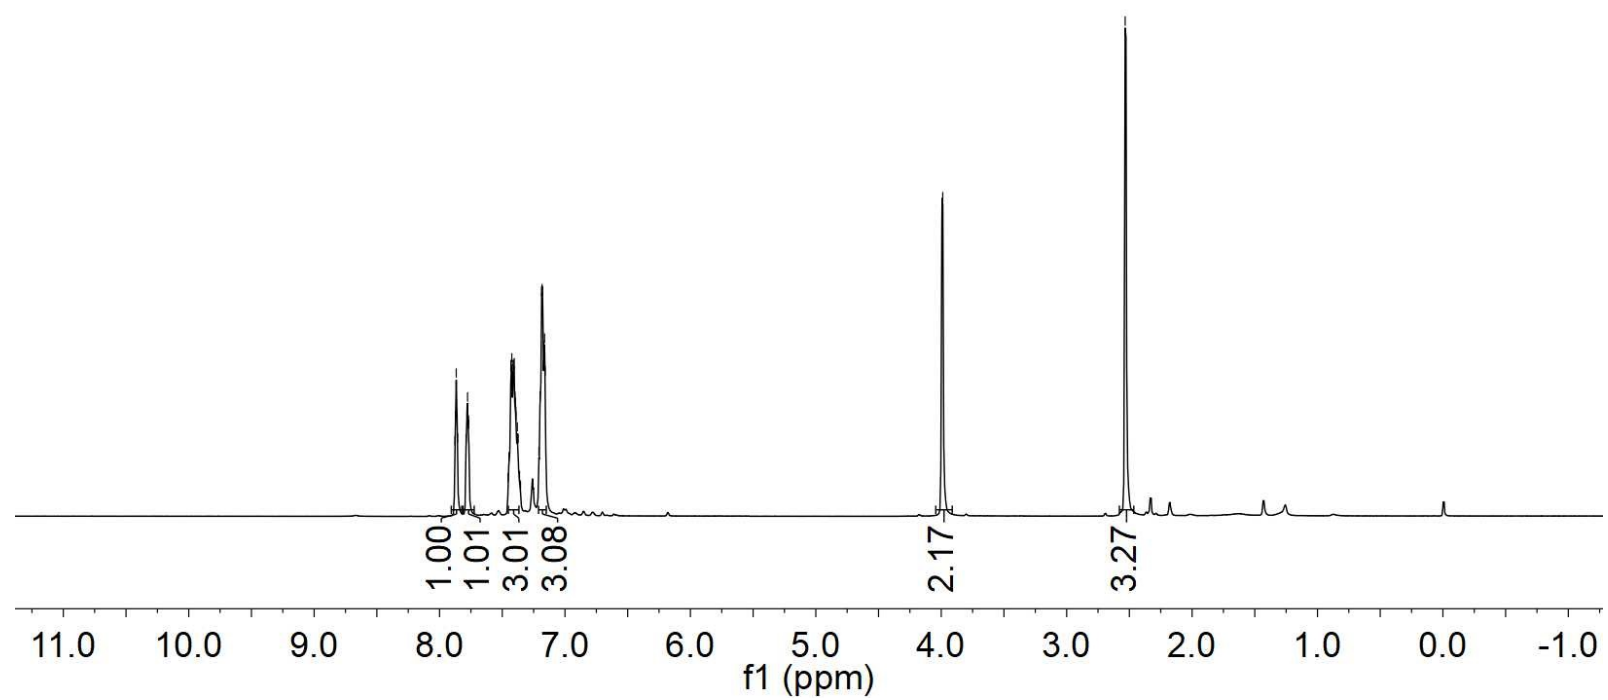

—158.519  
142.456  
140.346  
134.288  
134.253  
129.026  
128.964  
127.666  
126.544  
—111.618  
77.318  
77.000  
76.683  
—34.237  
—24.118

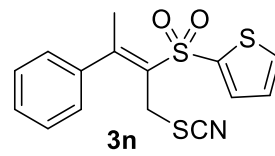

$^{13}\text{C}$  NMR, 100 MHz,  $\text{CDCl}_3$

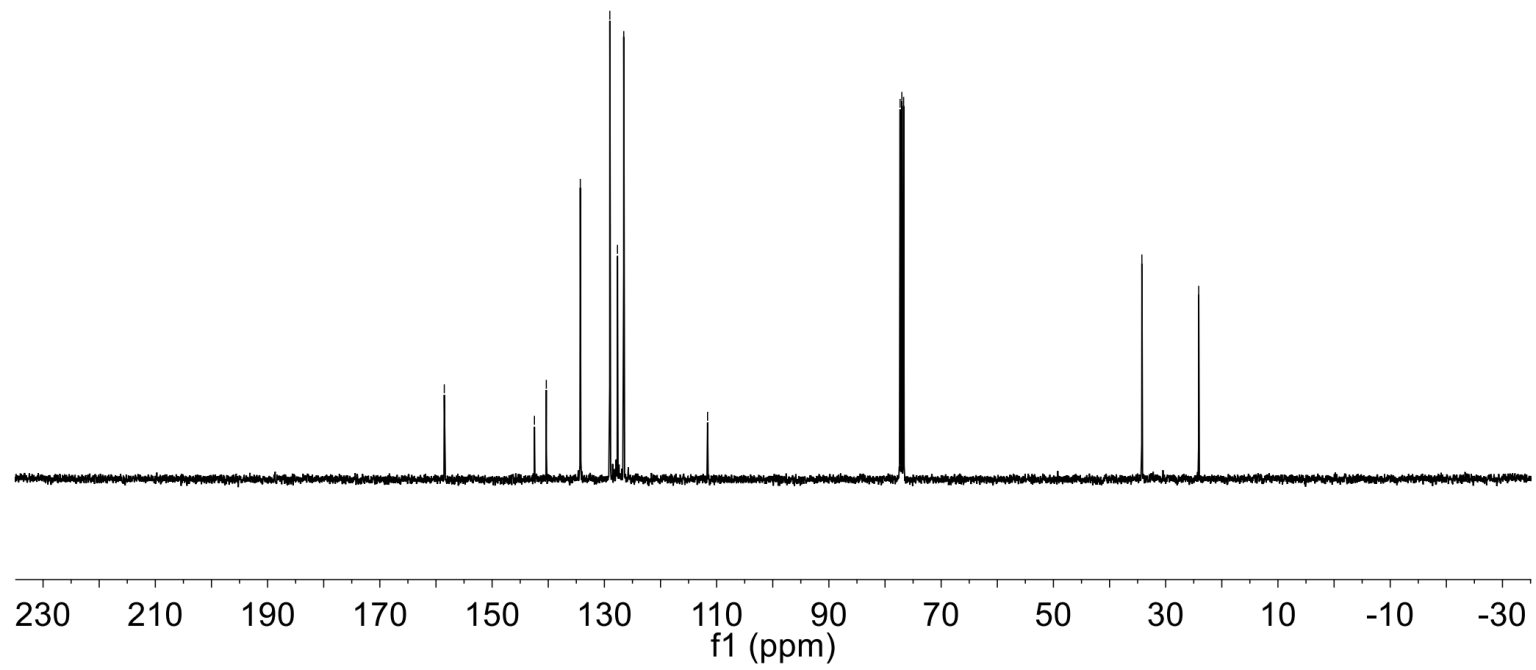

S50

7.749  
7.736  
7.692  
7.682  
7.260  
7.165  
7.153  
7.141  
7.085  
7.058

4.005

2.428  
2.411  
2.400  
2.374  
2.374  
2.347  
1.808  
1.797  
1.767  
1.729  
1.729  
1.698  
1.363  
1.331  
1.308  
1.286  
1.286  
1.253  
1.218

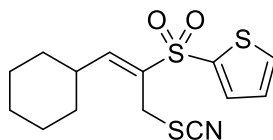

**3o**

<sup>1</sup>H NMR, 400 MHz, CDCl<sub>3</sub>

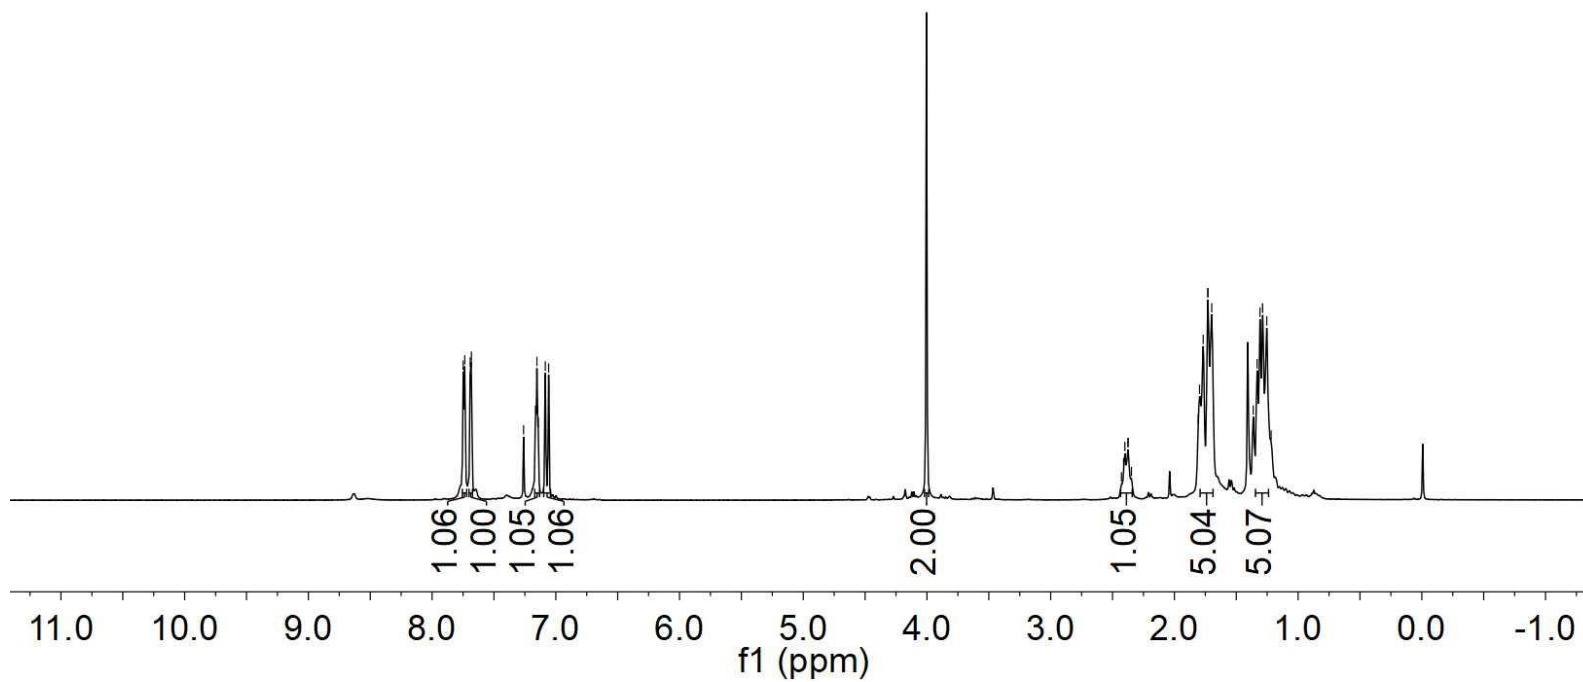

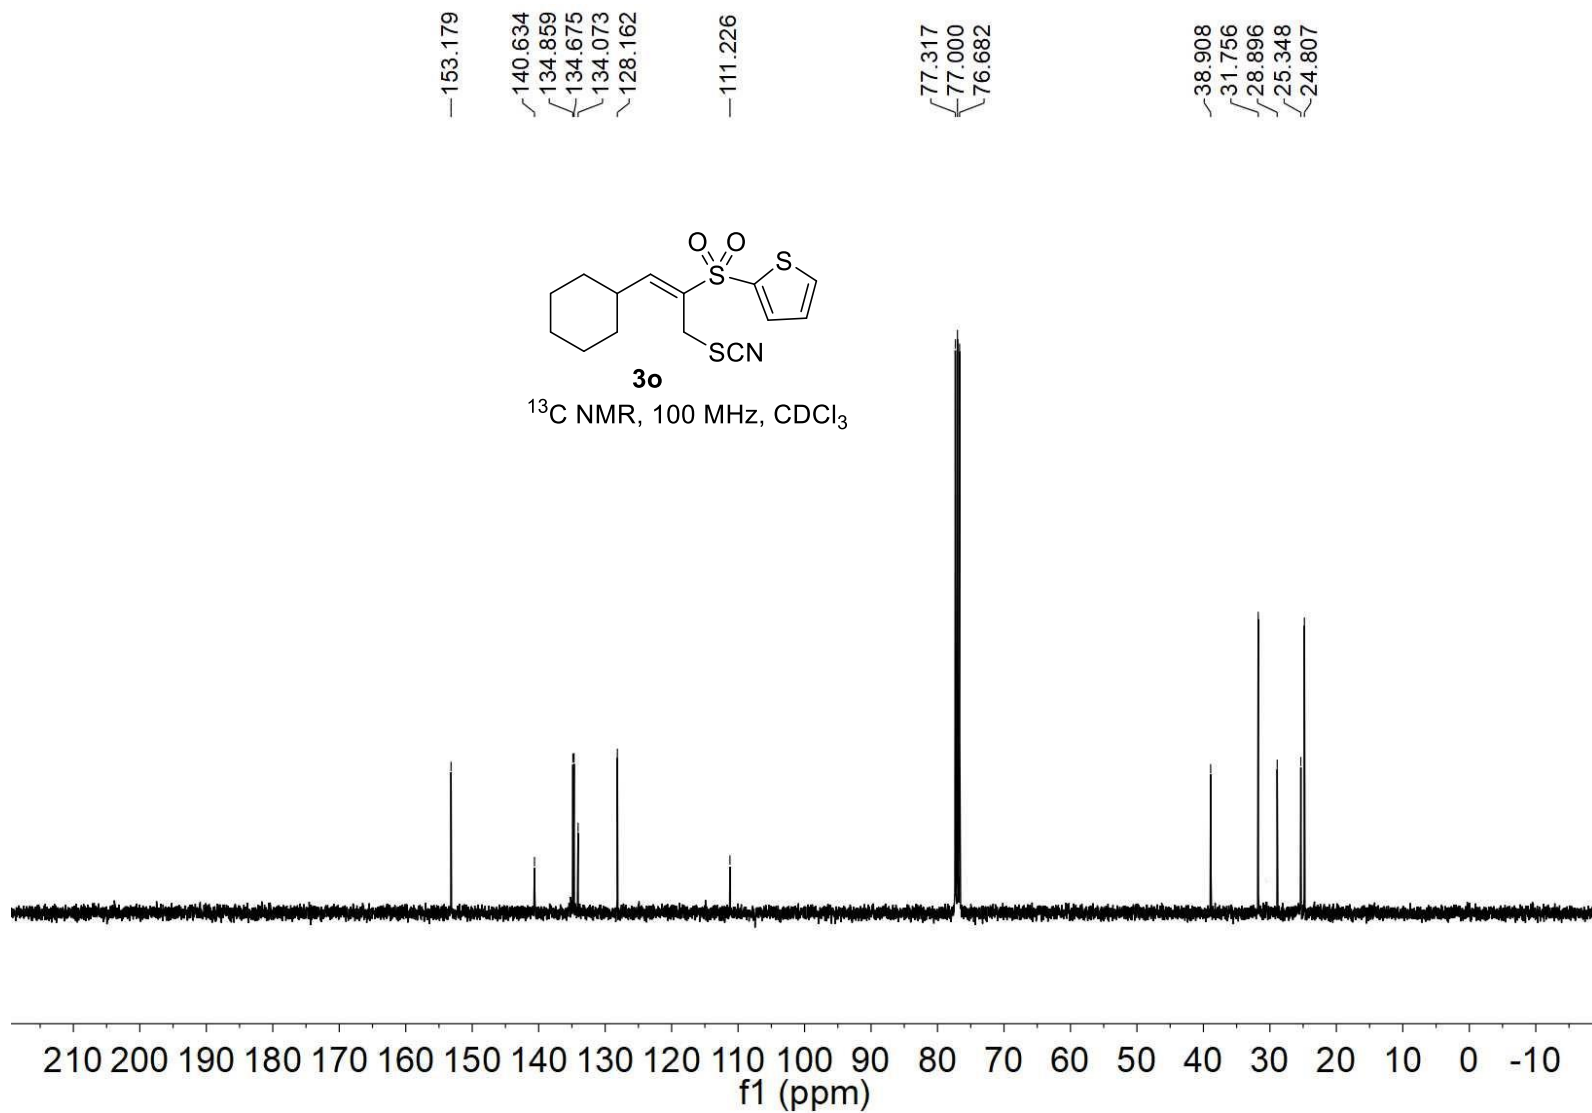

8.127  
8.115  
8.114  
7.991  
7.975  
7.975  
7.961  
7.959  
7.699  
7.683  
7.682  
7.666  
7.629  
7.612  
7.597  
7.595  
7.577  
7.503  
7.502  
7.490  
7.260

4.190

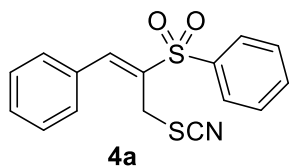

<sup>1</sup>H NMR, 400 MHz, CDCl<sub>3</sub>

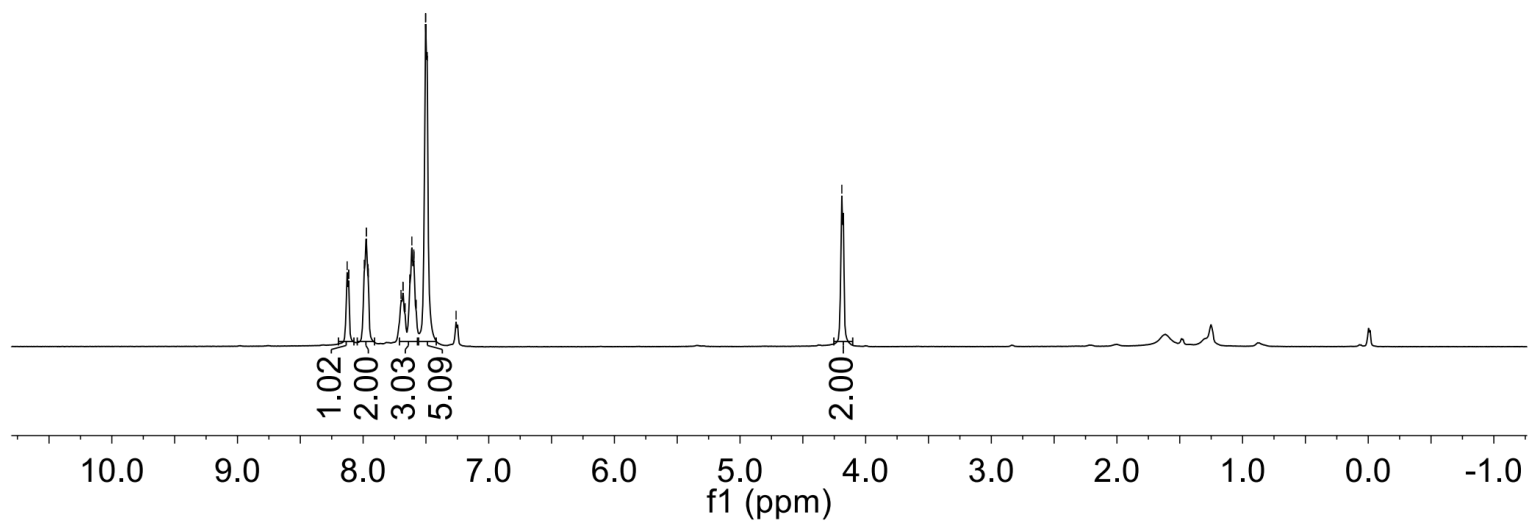

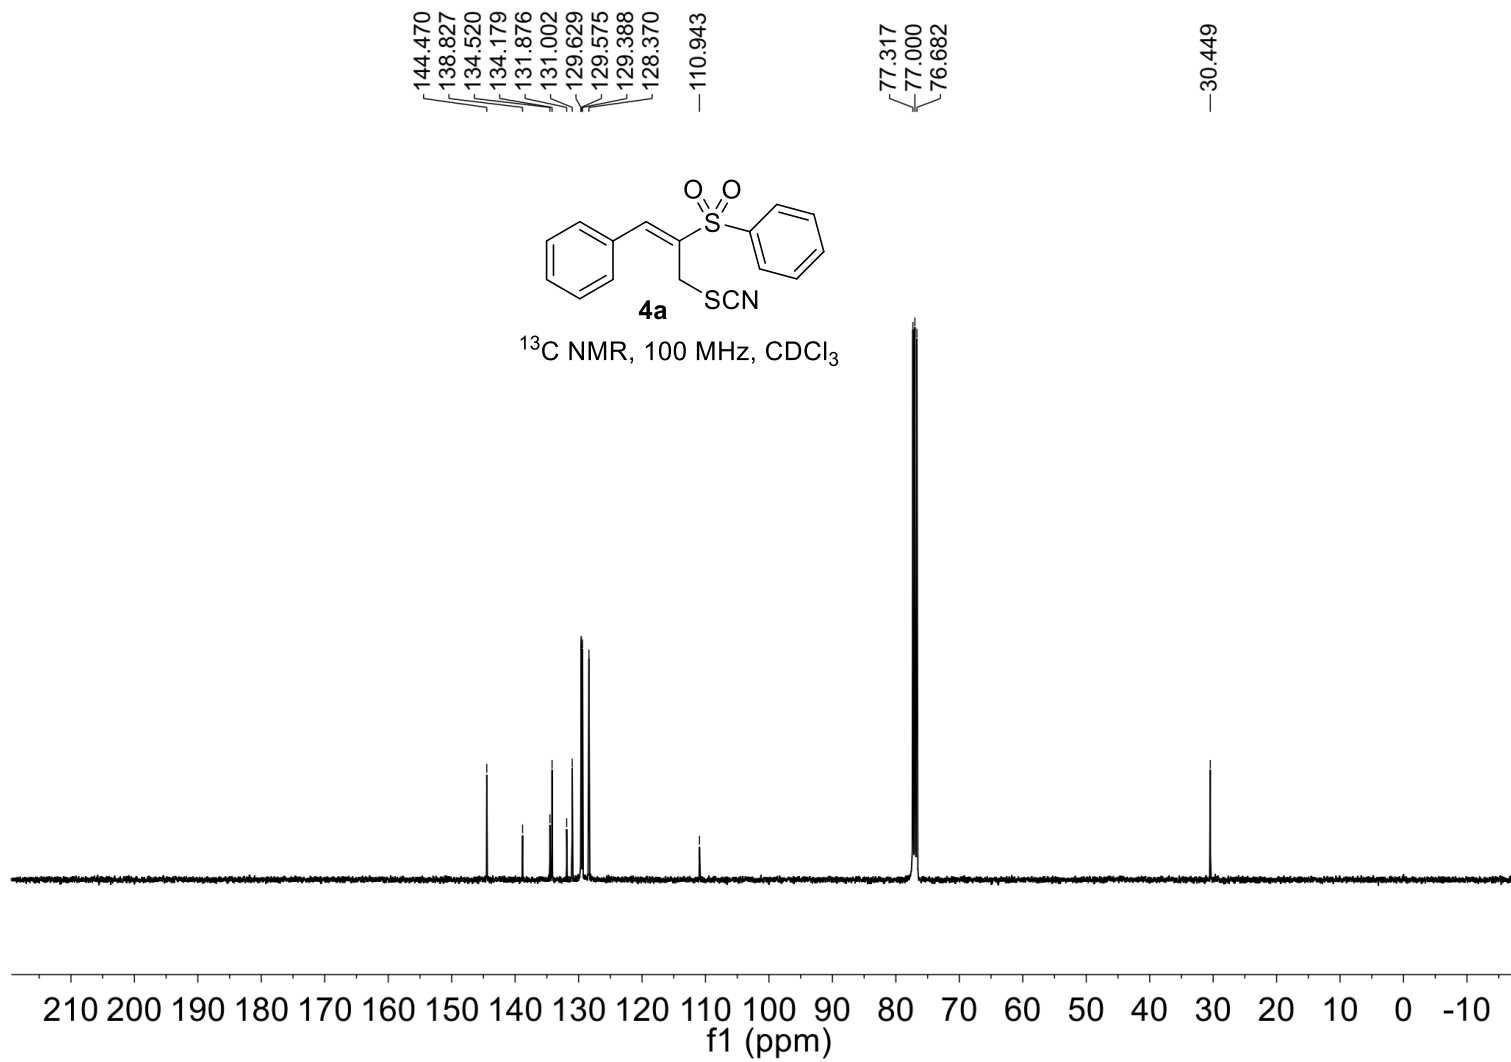

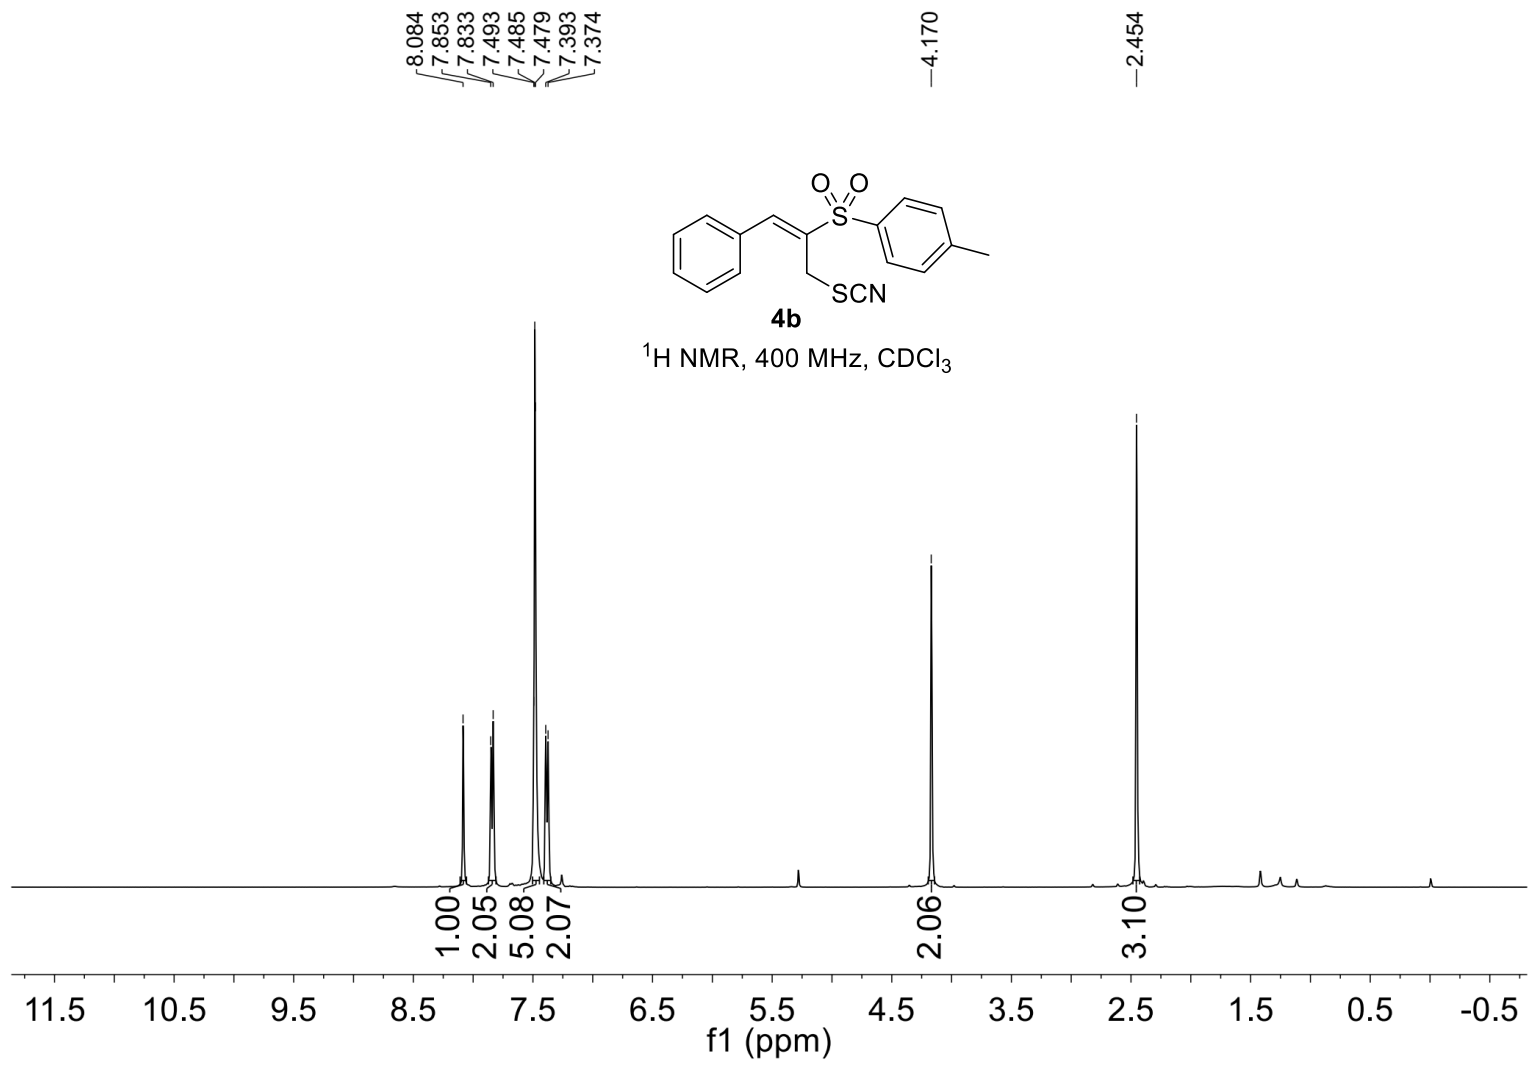

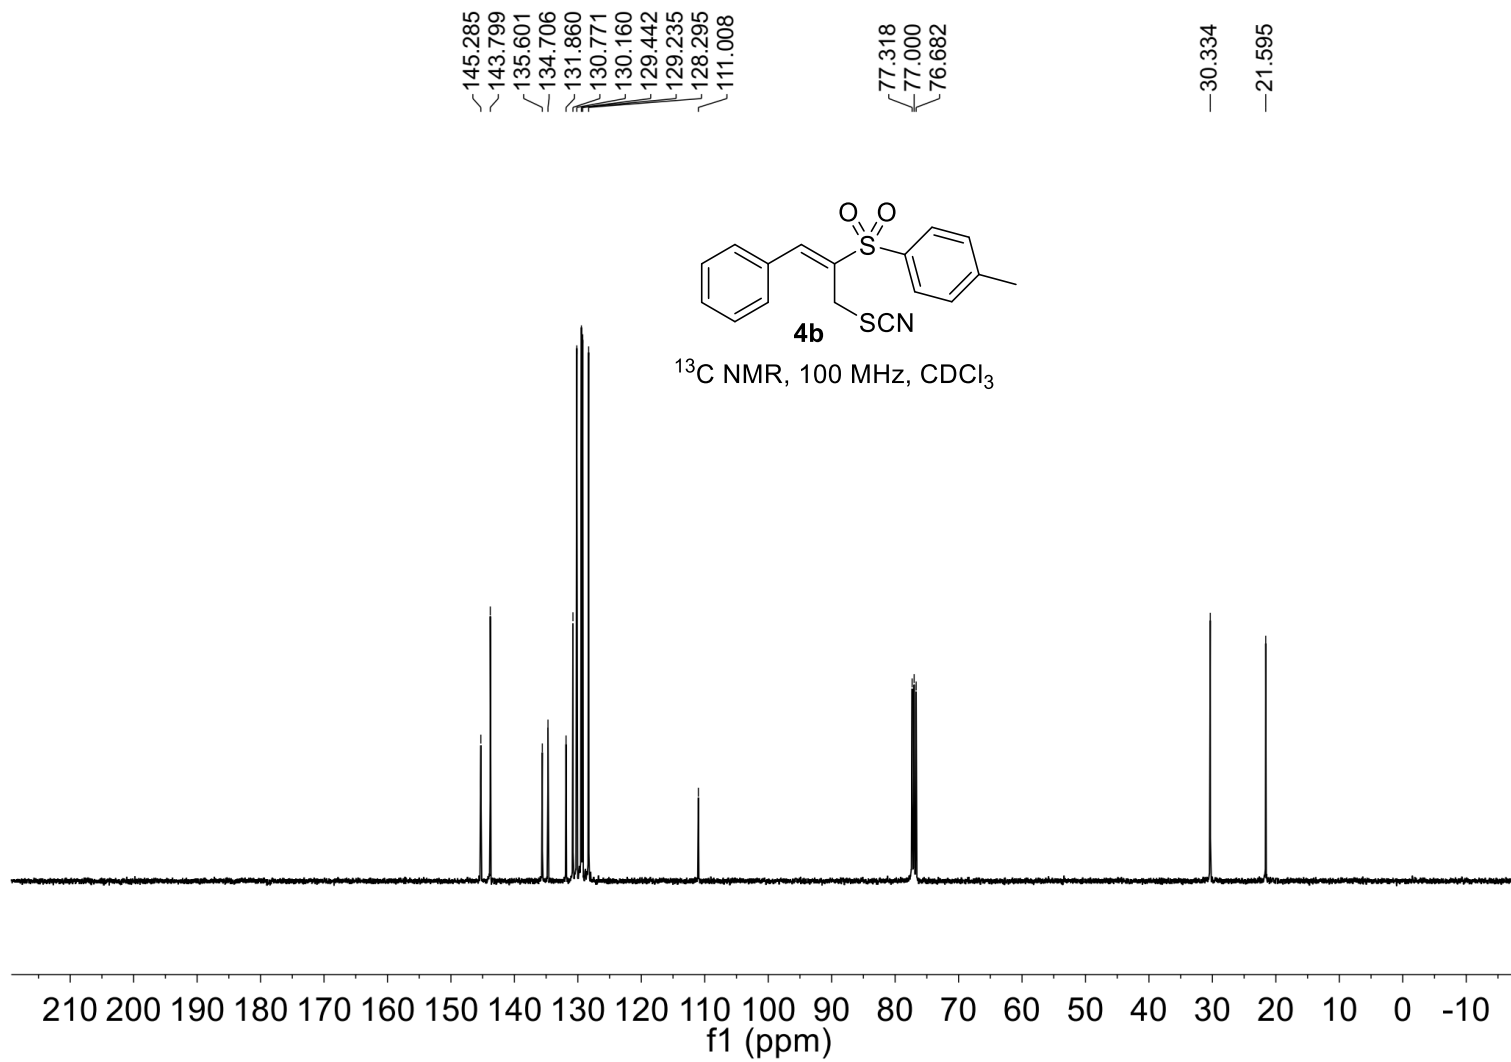

8.116  
7.923  
7.902  
7.577  
7.556  
7.494

4.195

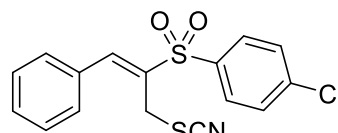

**4c**

$^1\text{H NMR}$ , 400 MHz,  $\text{CDCl}_3$

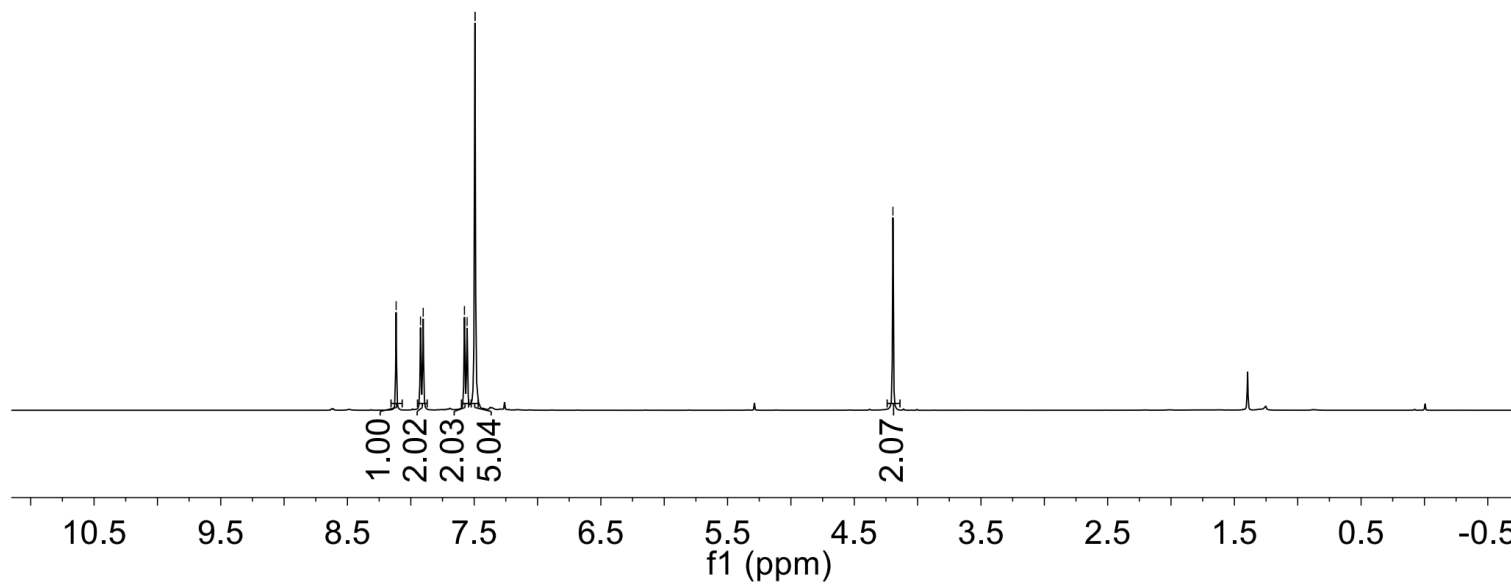

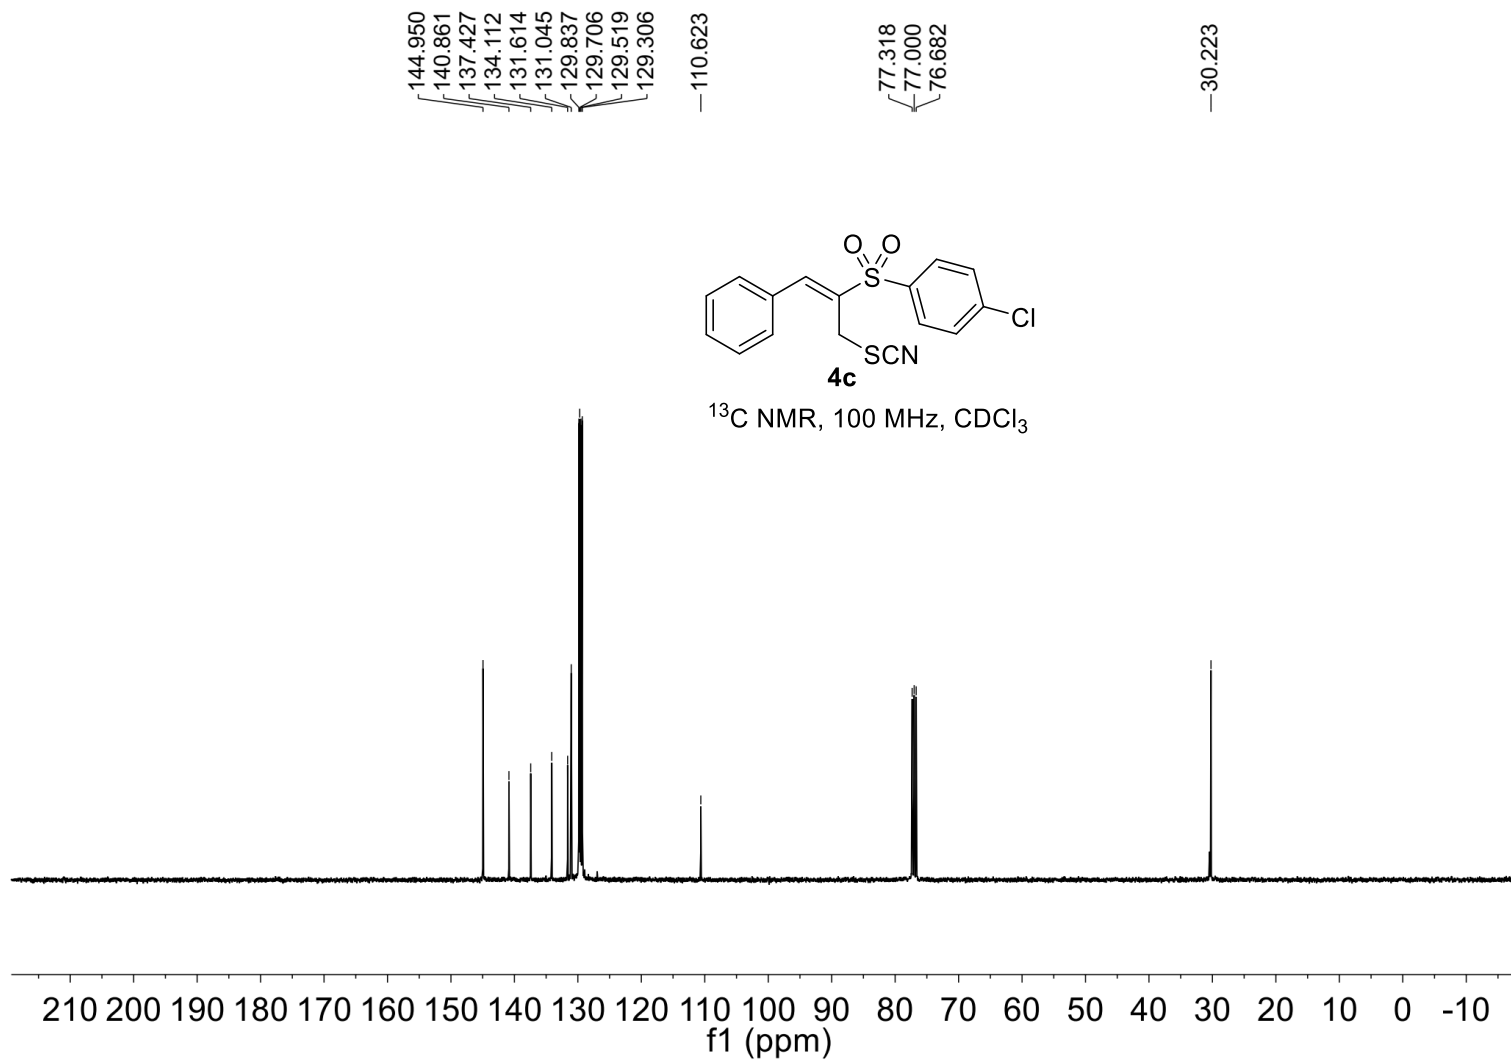



145.357  
140.833  
137.125  
133.815  
131.560  
131.163  
131.024  
130.985  
129.619  
129.346  
126.837  
123.484  
— 110.590

77.318  
77.000  
76.682

— 30.260

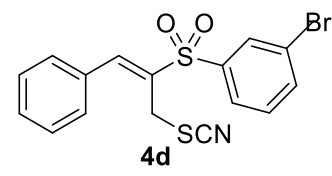

<sup>13</sup>C NMR, 100 MHz, CDCl<sub>3</sub>

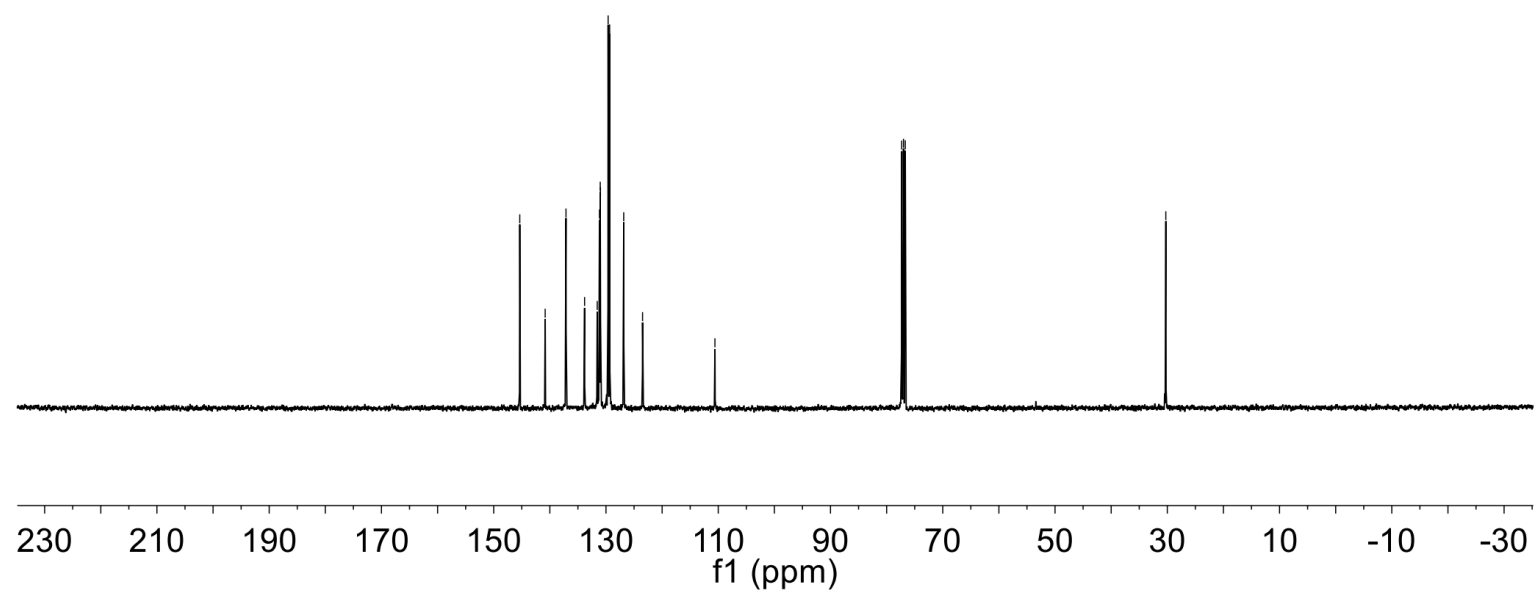

8.179  
8.125  
8.117  
8.116  
8.104  
8.096  
7.904  
7.895  
7.895  
7.883  
7.874  
7.510  
7.502  
7.501  
7.260

4.221

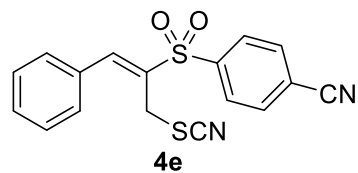

<sup>1</sup>H NMR, 400 MHz, CDCl<sub>3</sub>

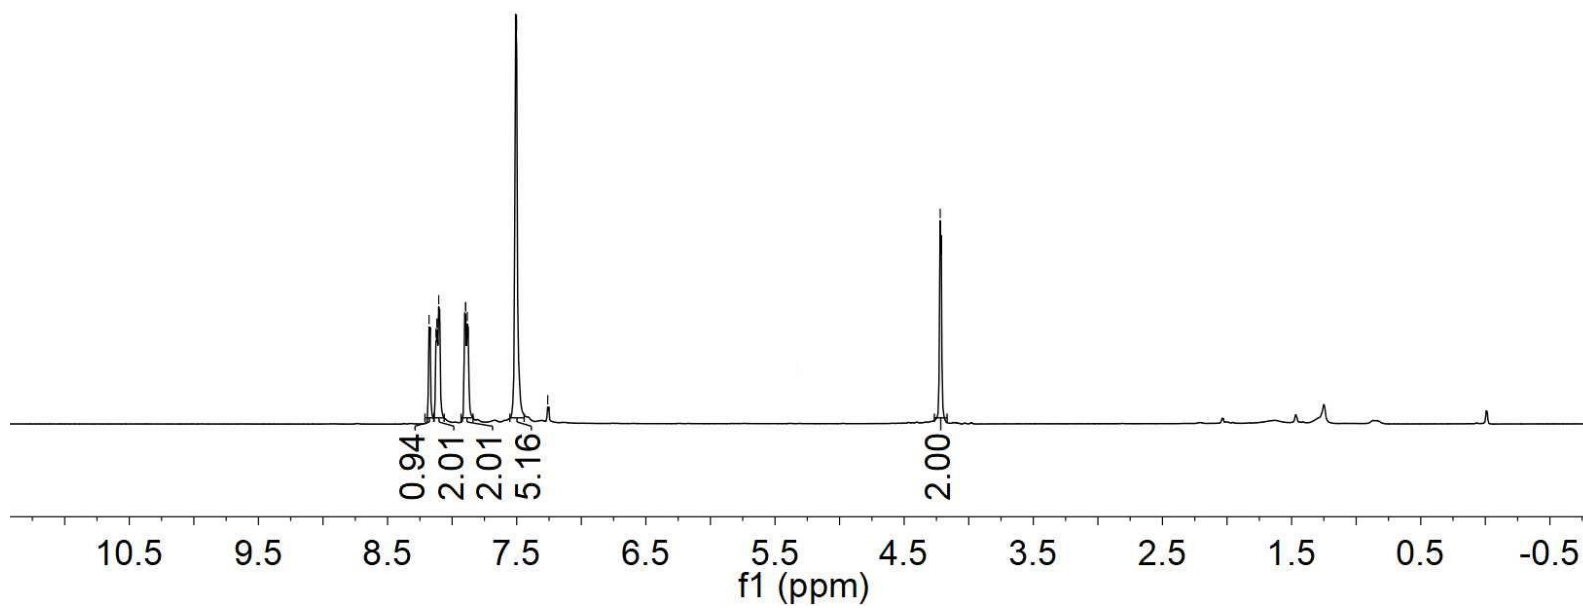

S61

146.568  
143.612  
133.444  
133.231  
131.458  
131.412  
129.659  
129.467  
128.920  
117.762  
116.931  
110.214

77.318  
77.000  
76.682

—30.193

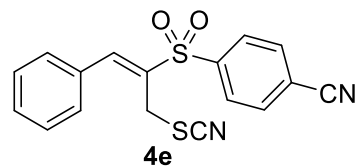

<sup>13</sup>C NMR, 100 MHz, CDCl<sub>3</sub>

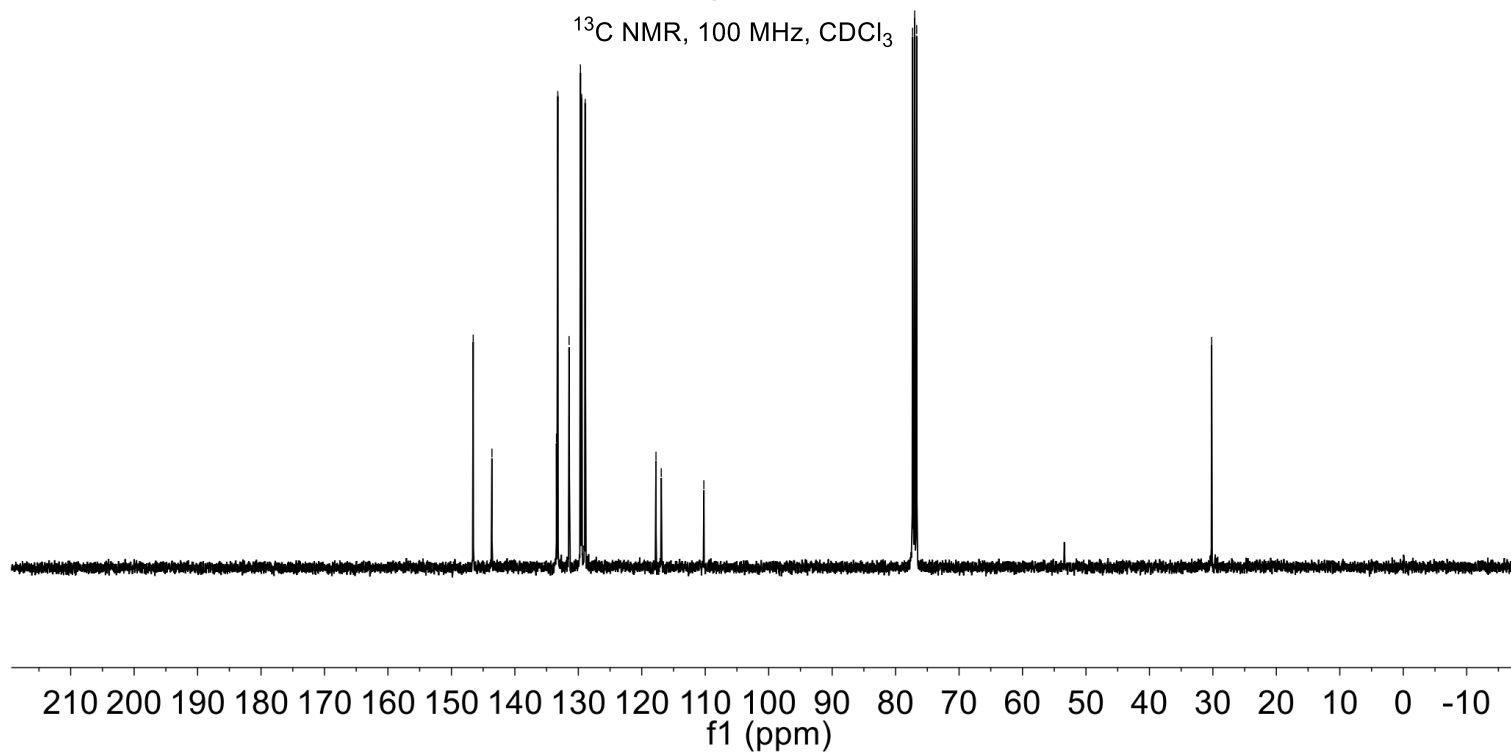

8.445  
8.435  
8.423  
8.418  
8.413  
8.213  
8.203  
8.190  
8.181  
7.522  
7.522  
7.513

4.250

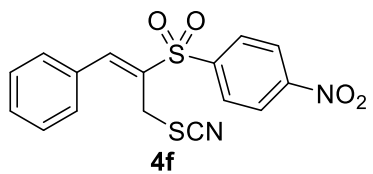

<sup>1</sup>H NMR, 400 MHz, CDCl<sub>3</sub>

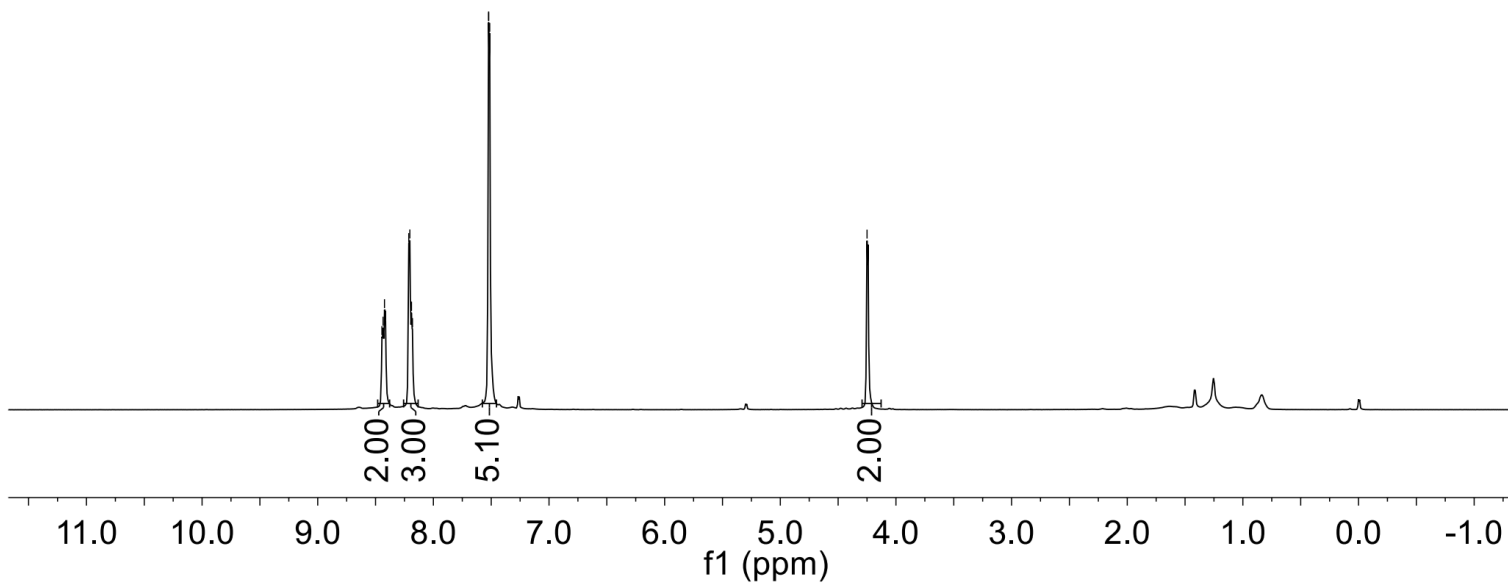

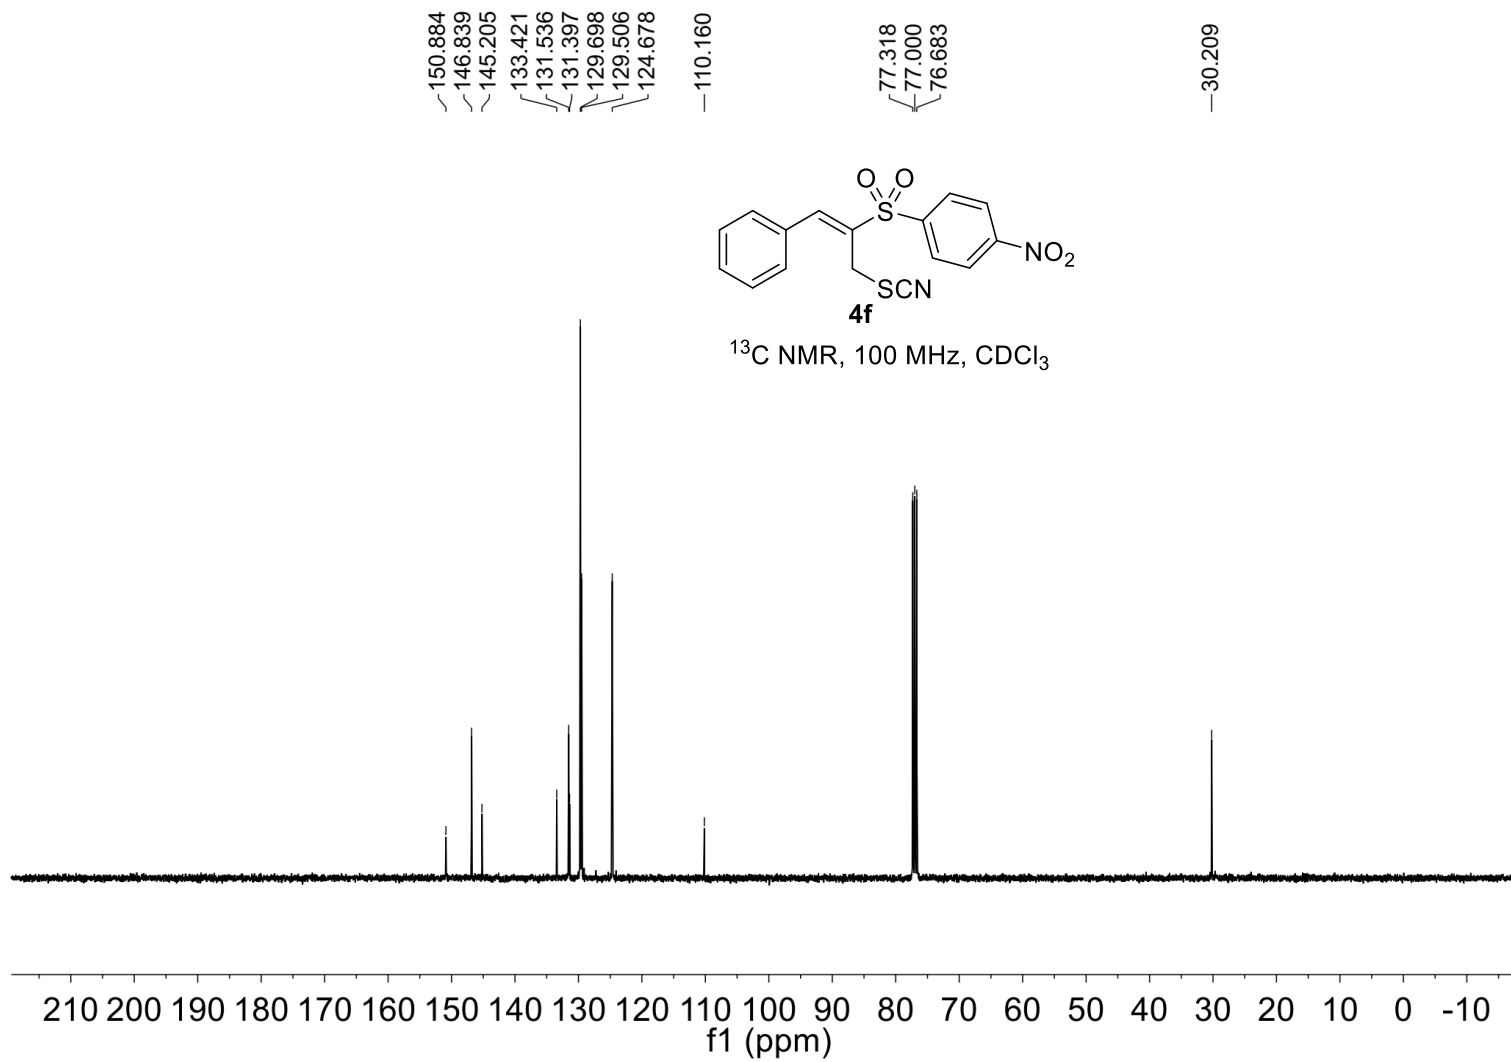

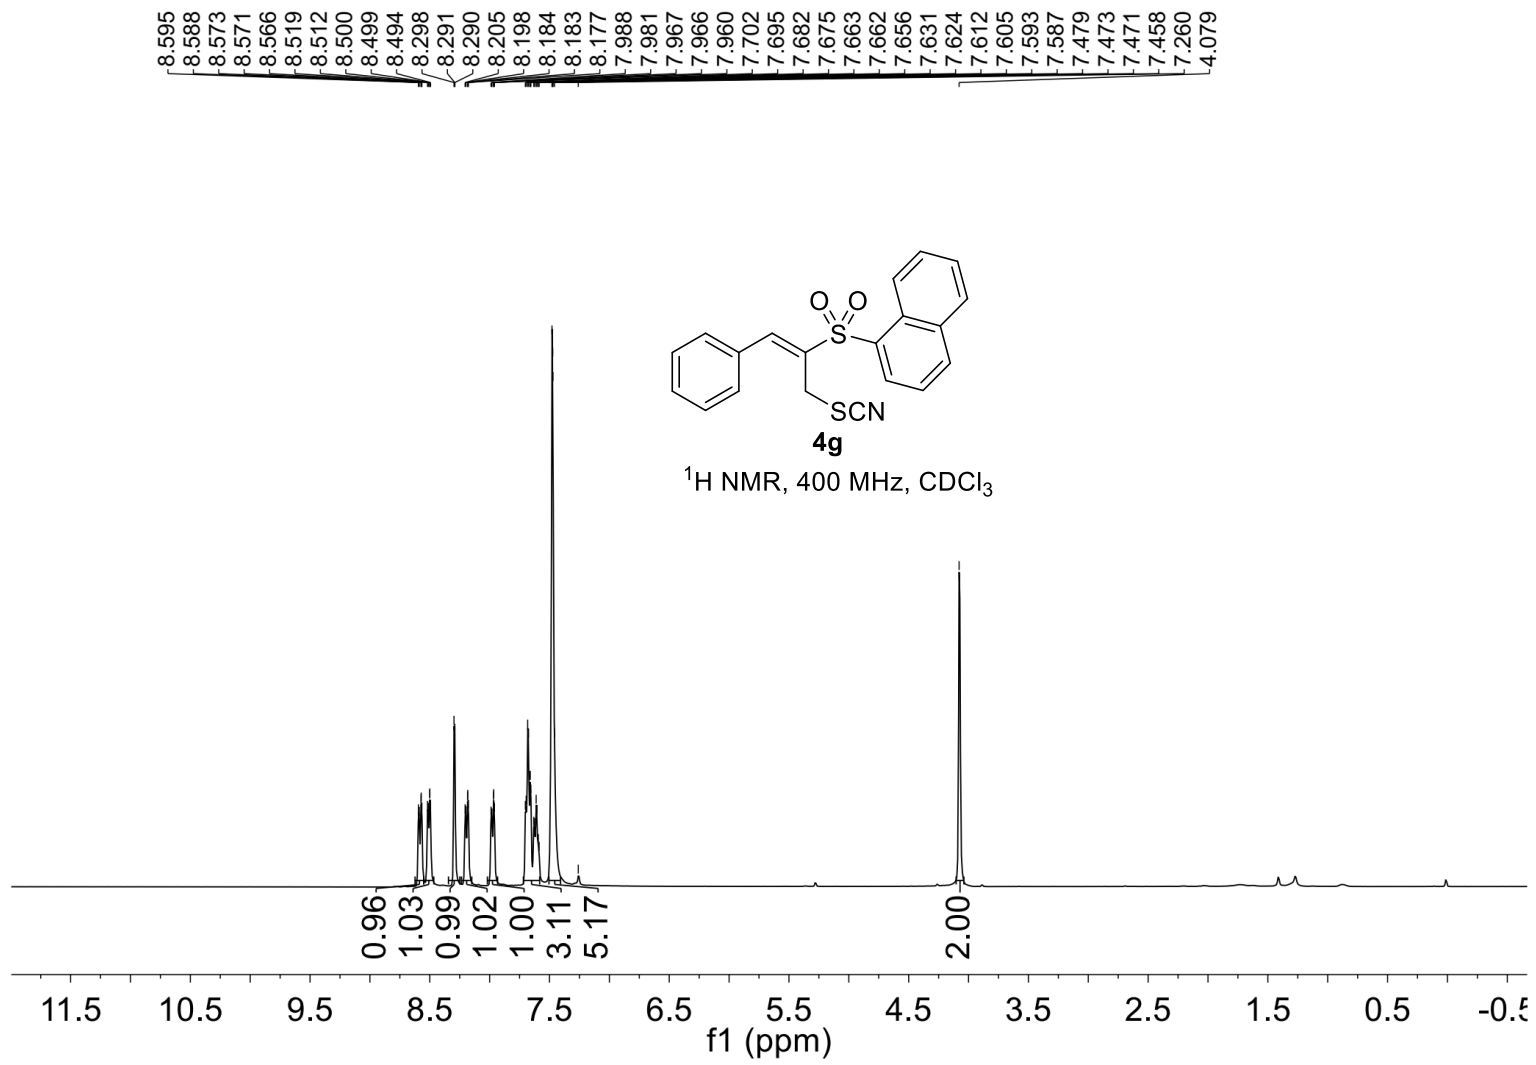

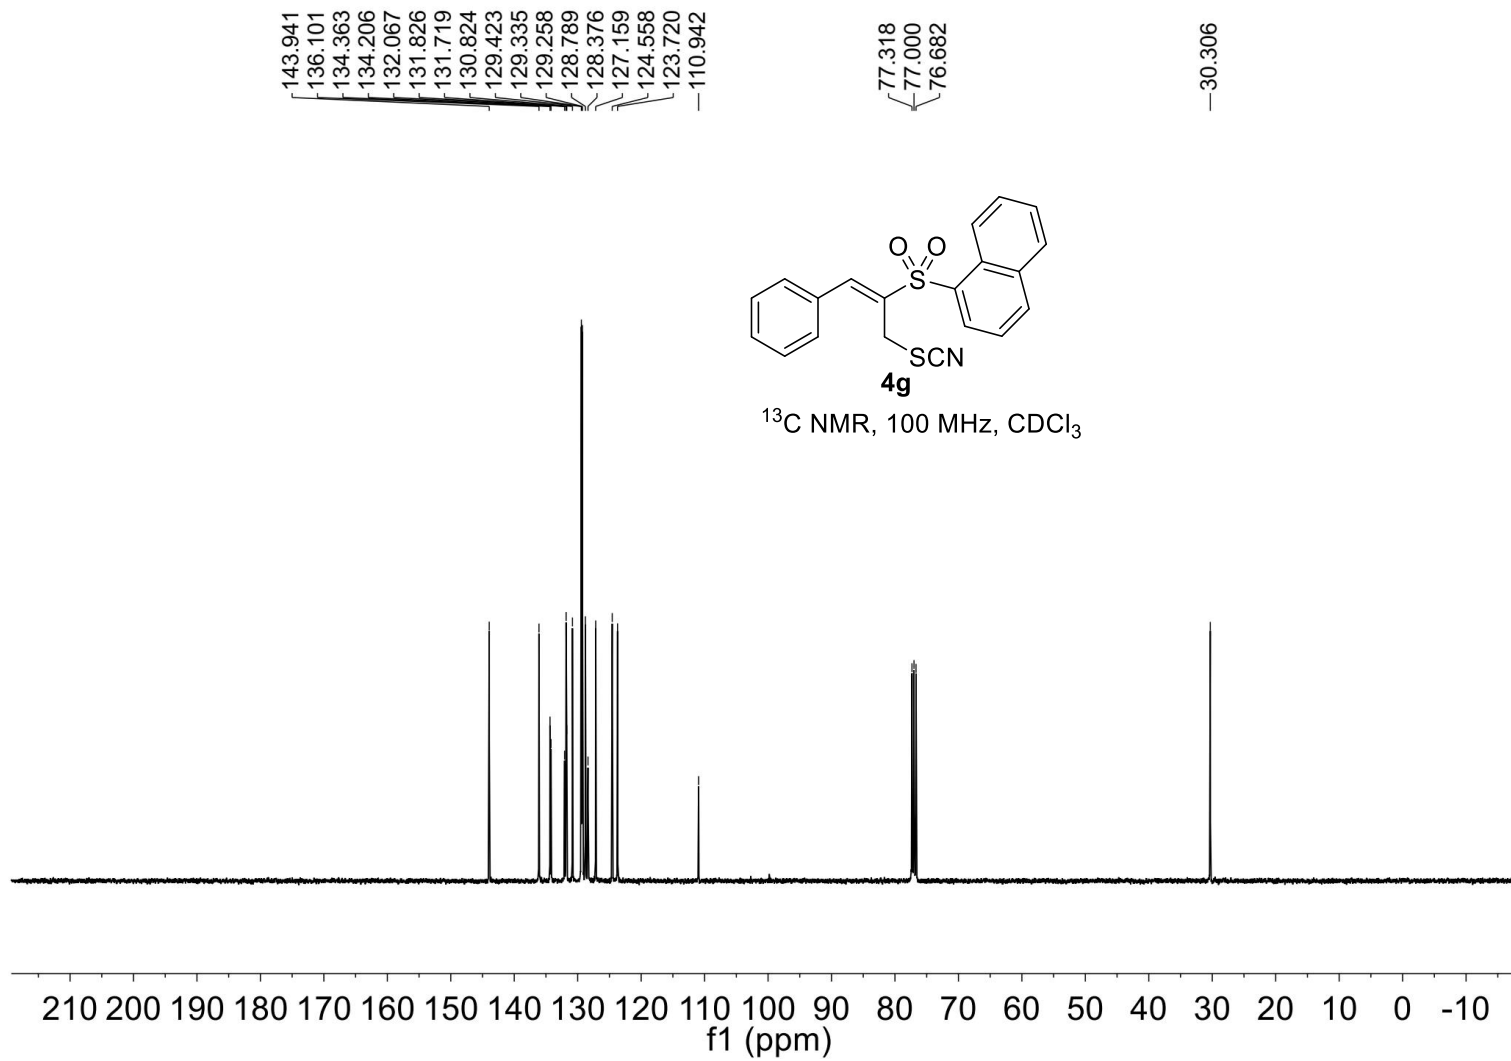

8.602  
8.191  
8.191  
8.182  
8.041  
8.031  
8.021  
8.009  
7.999  
7.942  
7.931  
7.921  
7.912  
7.876  
7.866  
7.851  
7.843  
7.695  
7.684  
7.666  
7.648  
7.637  
7.505  
7.495  
7.495  
7.483  
7.474  
7.466  
7.260

4.216

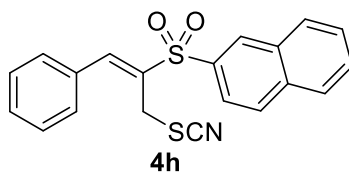

<sup>1</sup>H NMR, 400 MHz, CDCl<sub>3</sub>

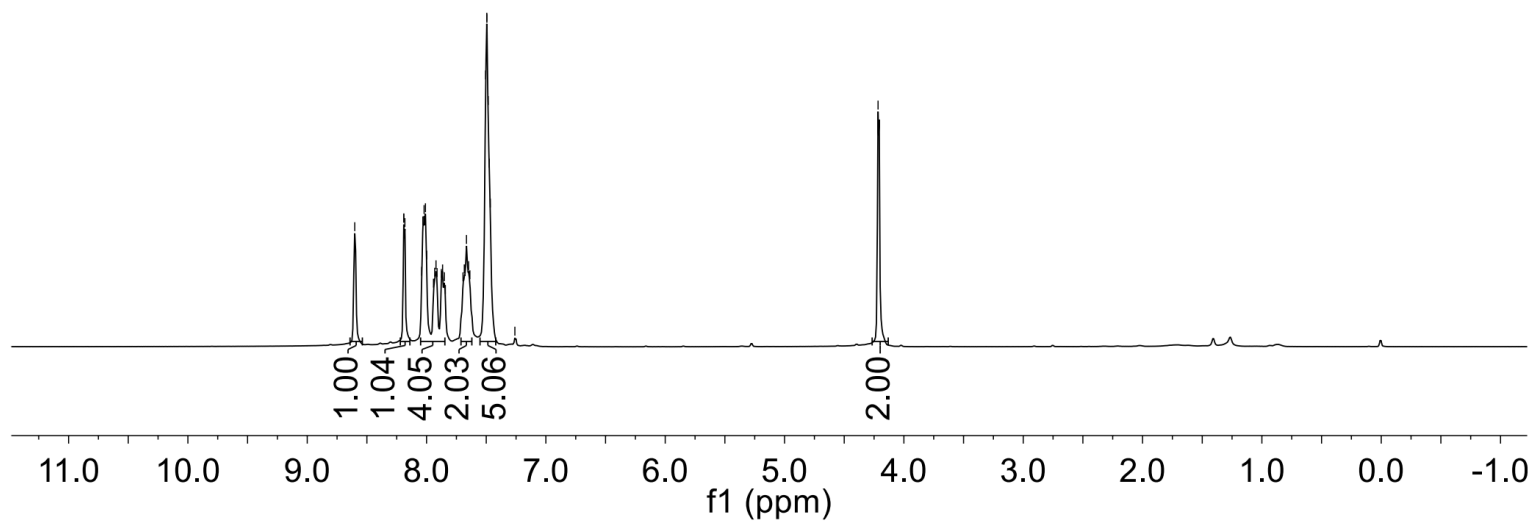

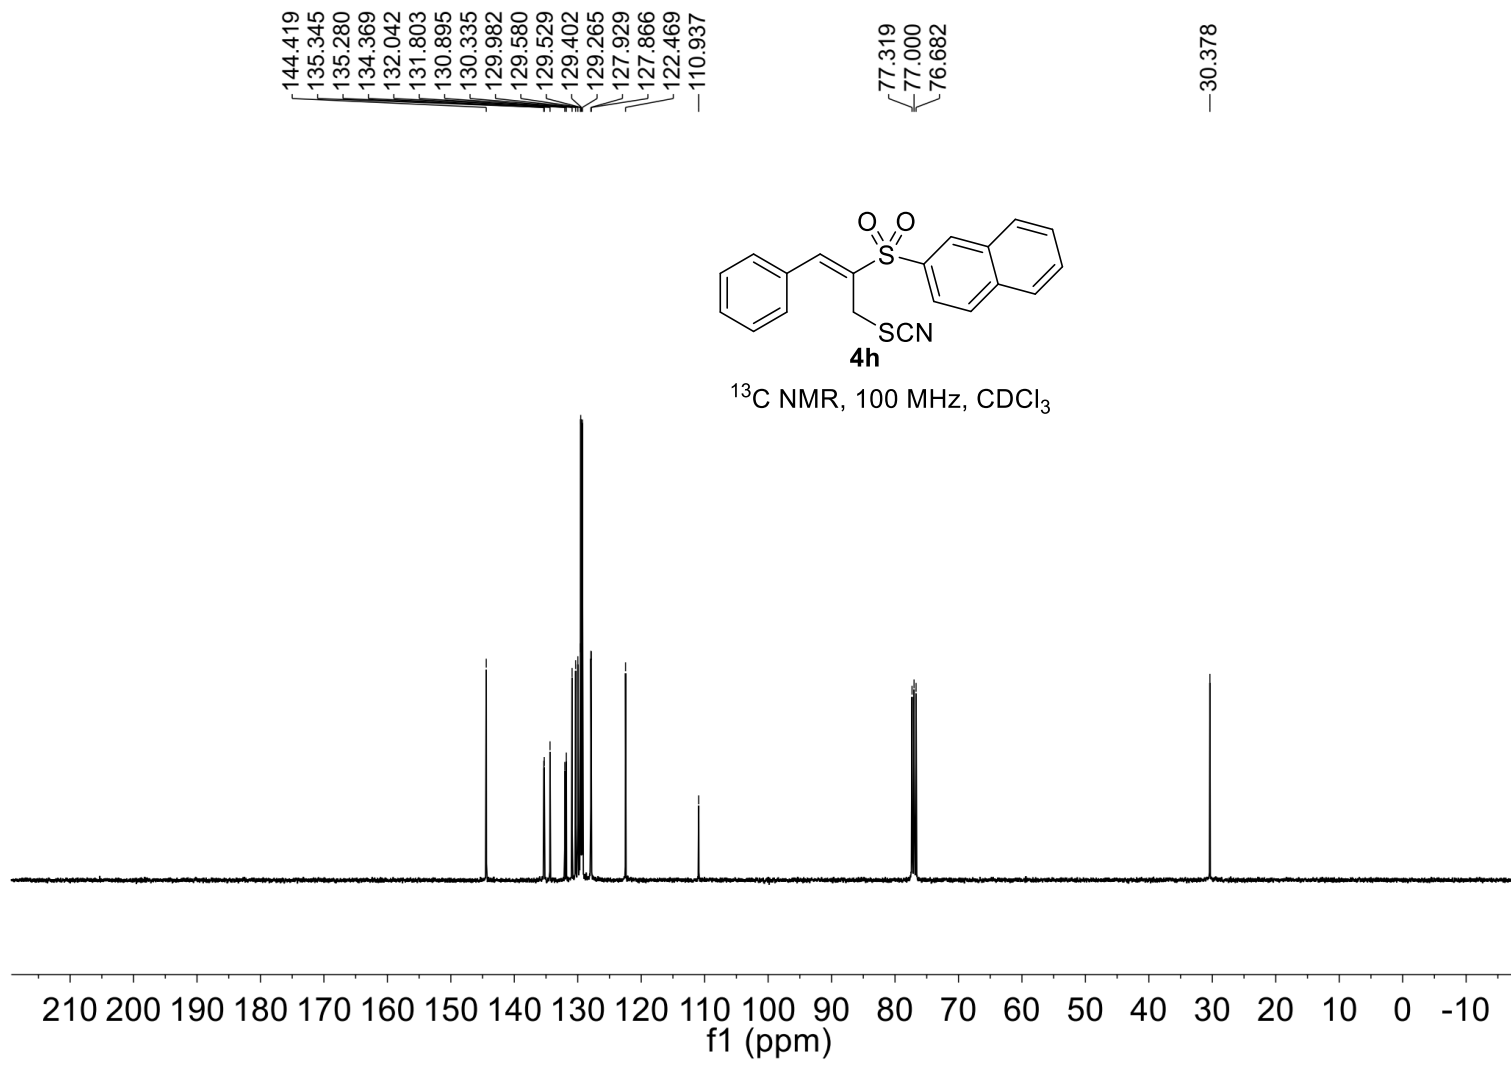

8.215  
8.101  
7.498  
7.400  
7.388  
7.385  
7.260

4.244

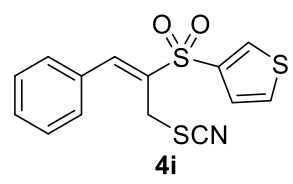

<sup>1</sup>H NMR, 400 MHz, CDCl<sub>3</sub>

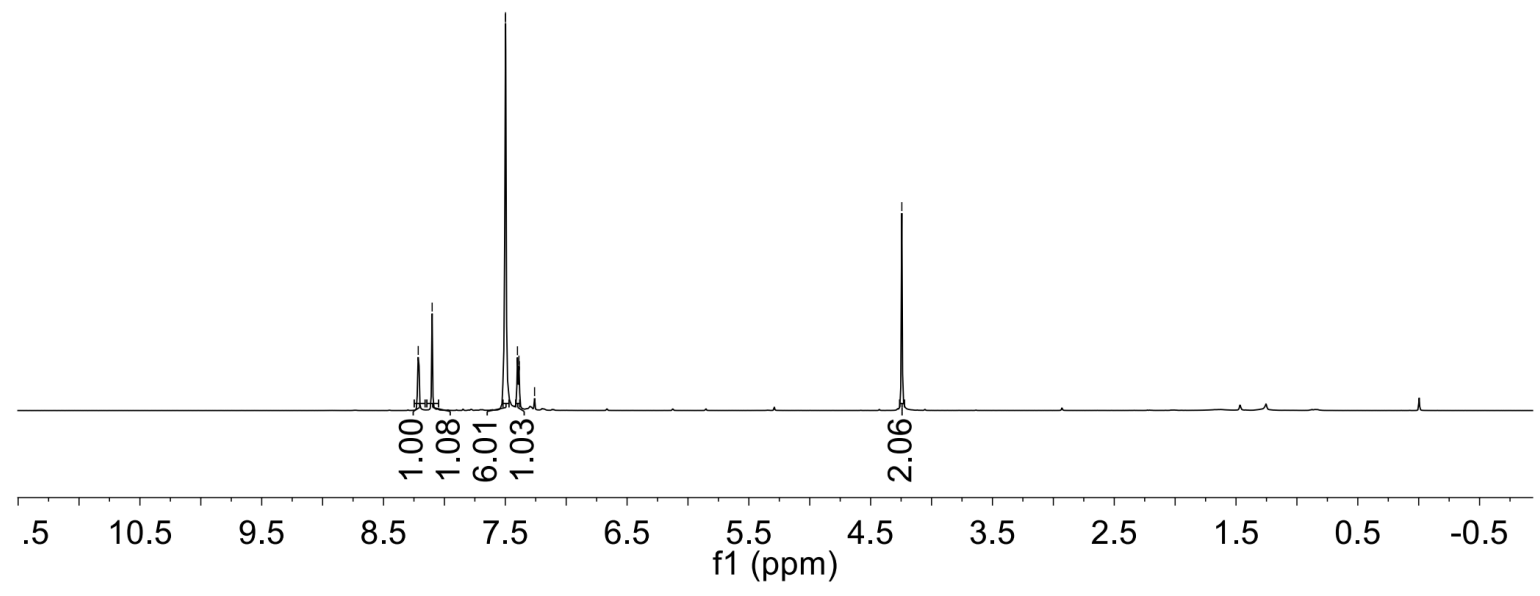

144.089  
138.946  
134.561  
133.710  
131.730  
130.892  
129.485  
129.251  
128.979  
125.933  
— 110.890

77.319  
77.000  
76.682

— 30.270

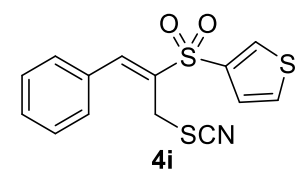

<sup>13</sup>C NMR, 100 MHz, CDCl<sub>3</sub>

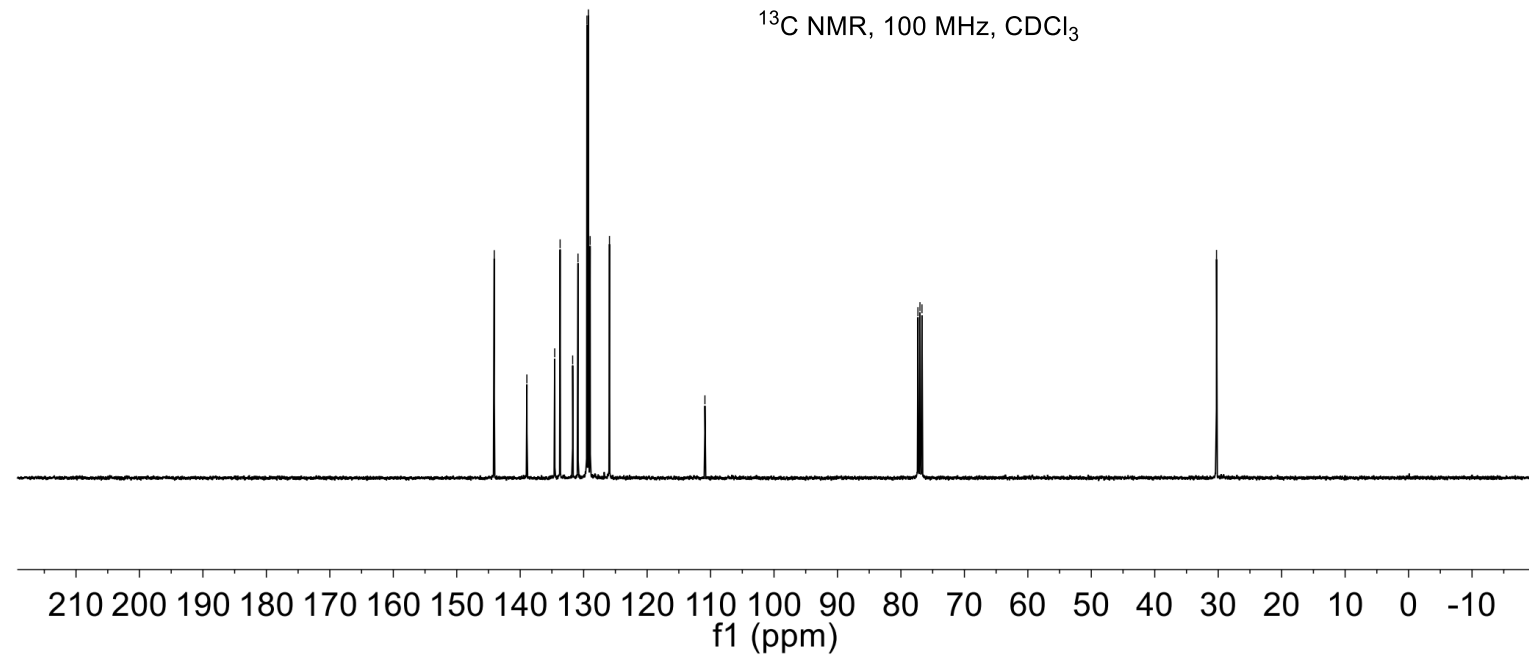

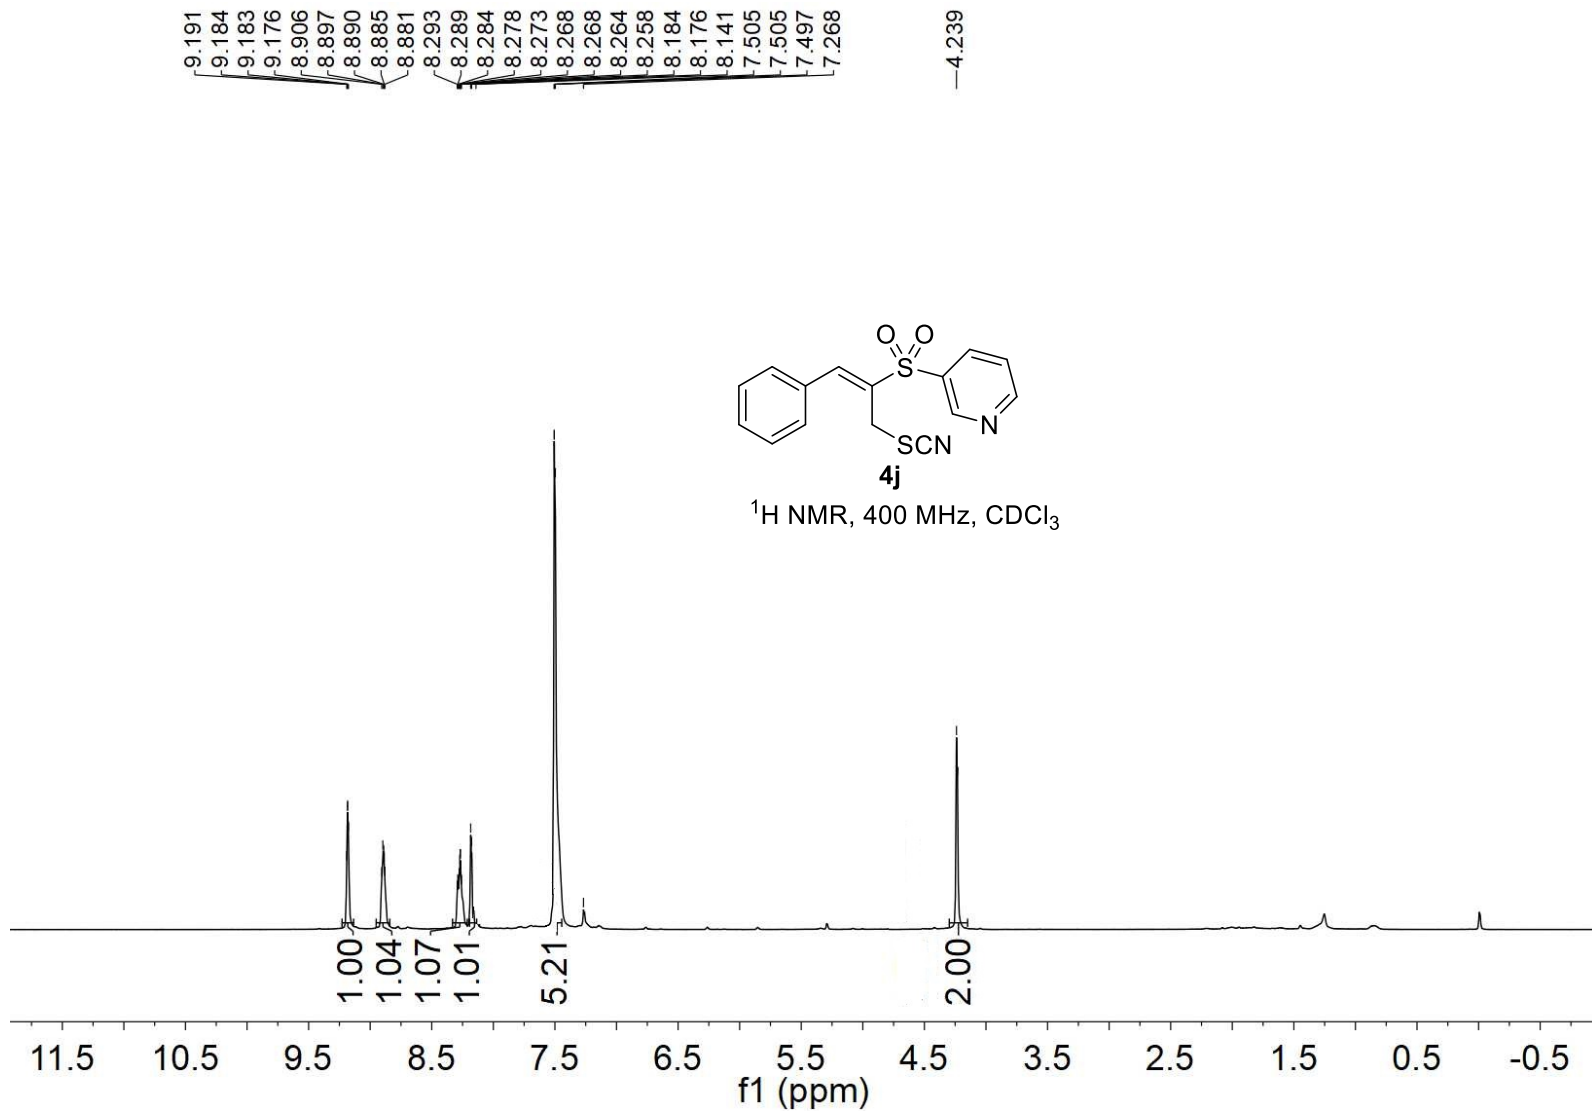

154.440  
149.213  
146.041  
135.958  
135.808  
133.973  
131.487  
131.303  
129.604  
129.414  
124.008  
110.282

77.318  
77.000  
76.682

30.161

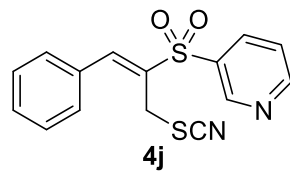

<sup>13</sup>C NMR, 100 MHz, CDCl<sub>3</sub>

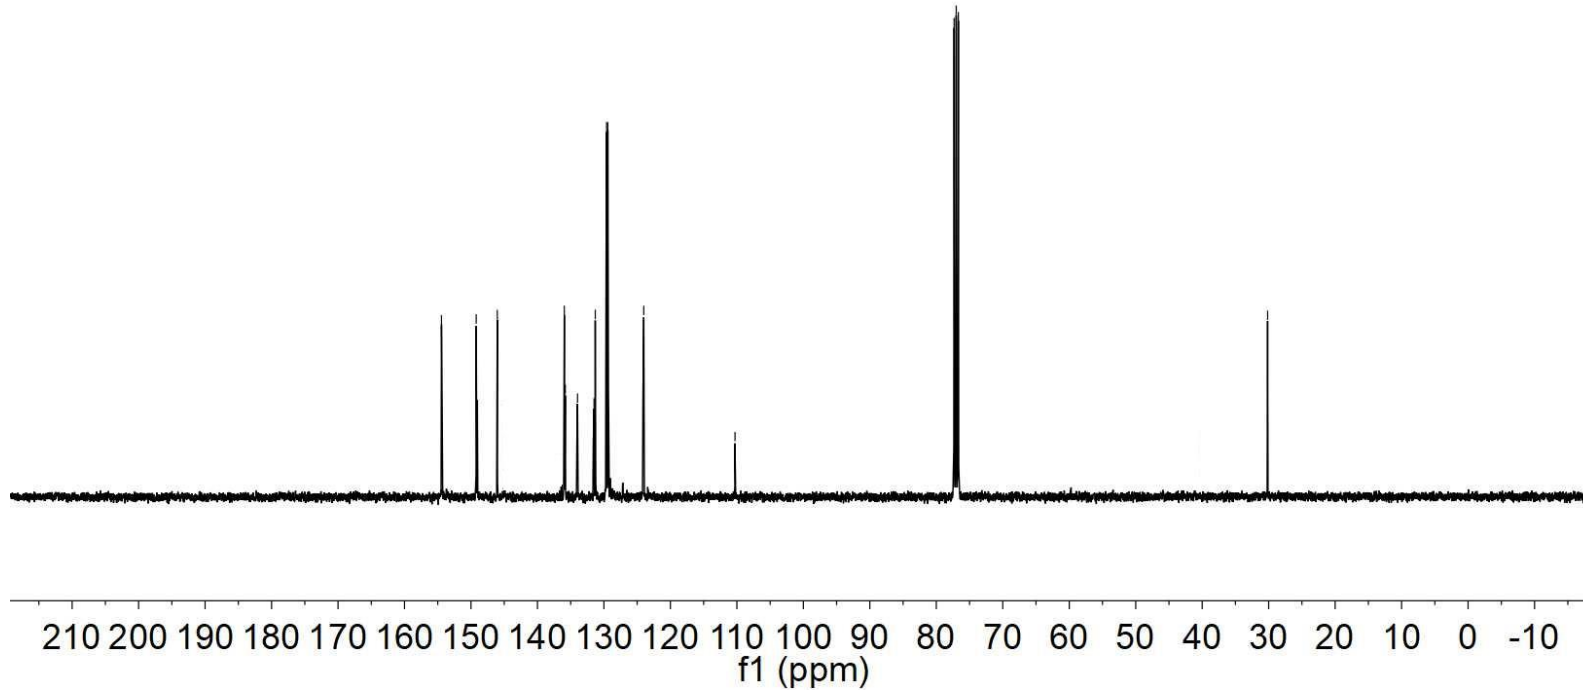

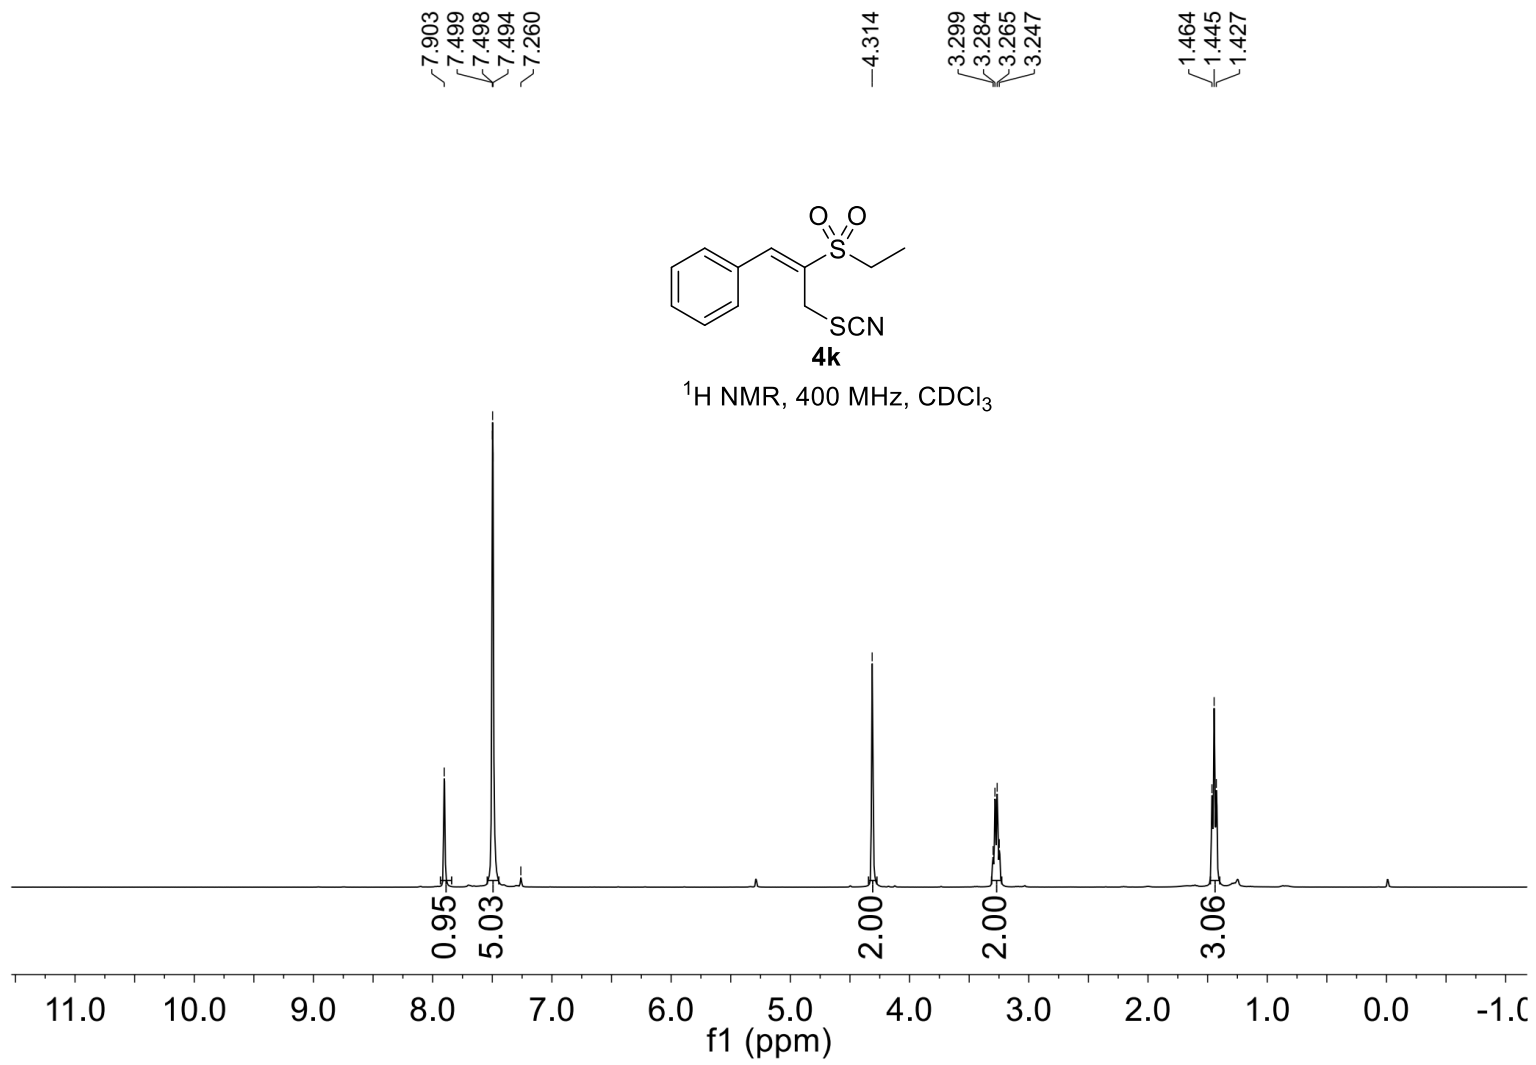

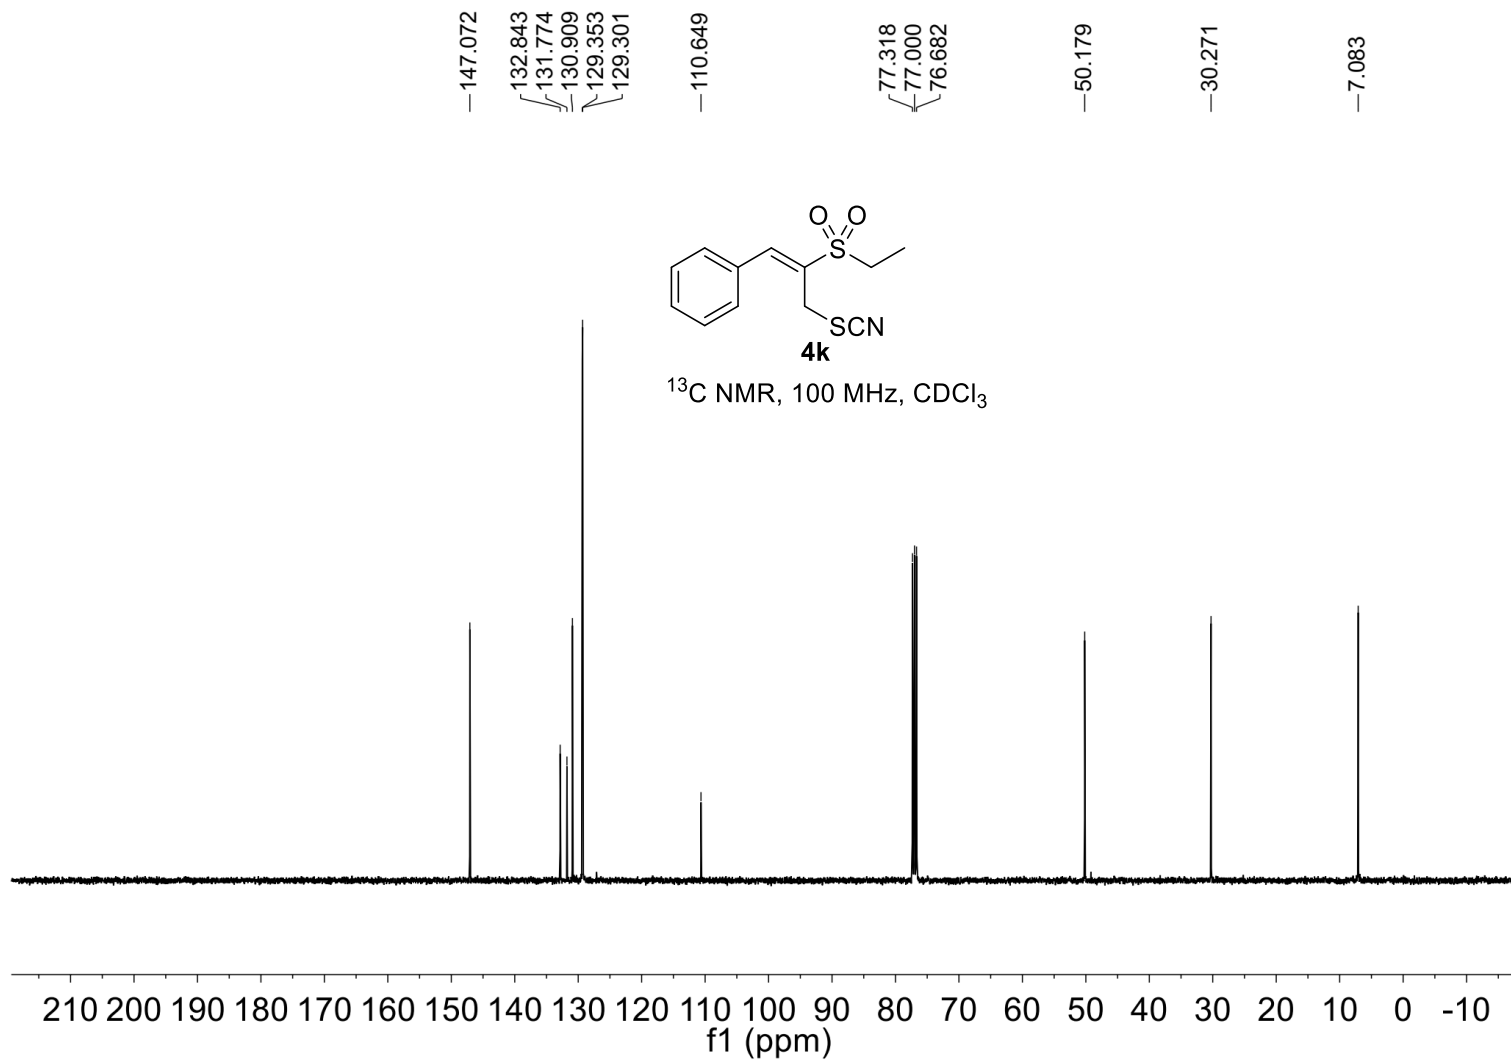

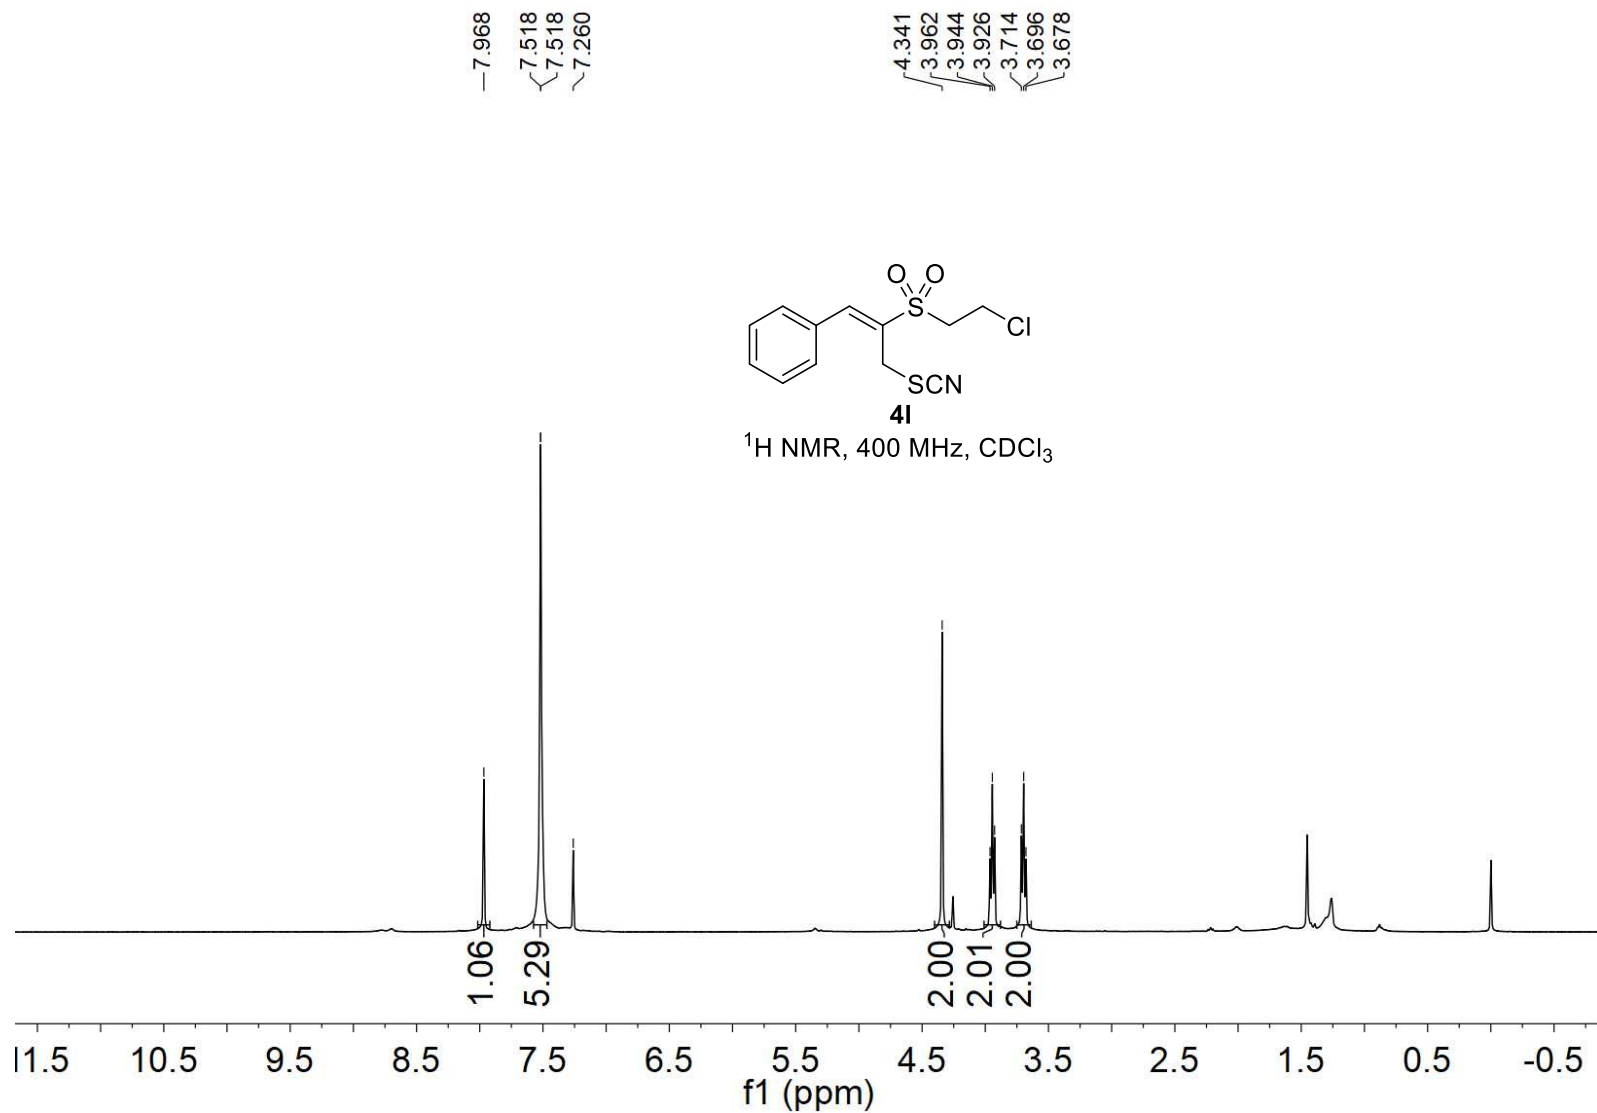

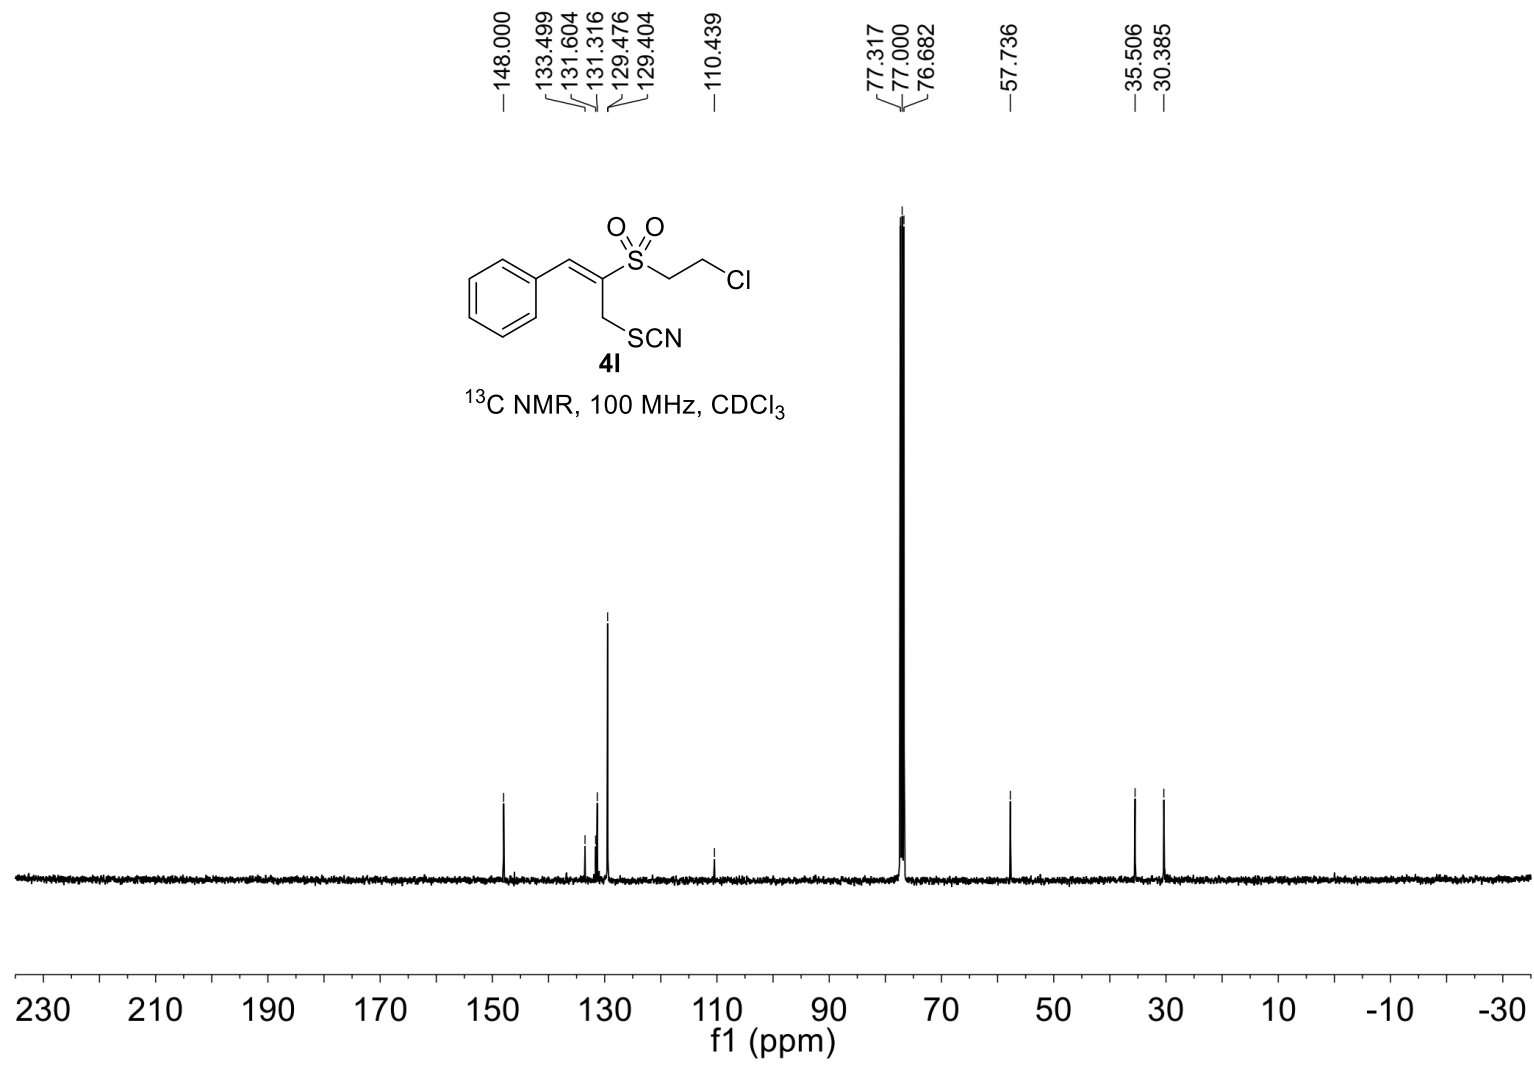

7.894  
7.516  
7.489  
7.489  
7.260

4.324  
3.844  
3.841  
3.829  
3.817  
3.813  
3.490  
3.487  
3.475  
3.463  
3.459  
3.311

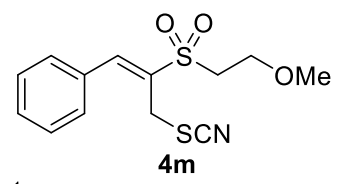

<sup>1</sup>H NMR, 400 MHz, CDCl<sub>3</sub>

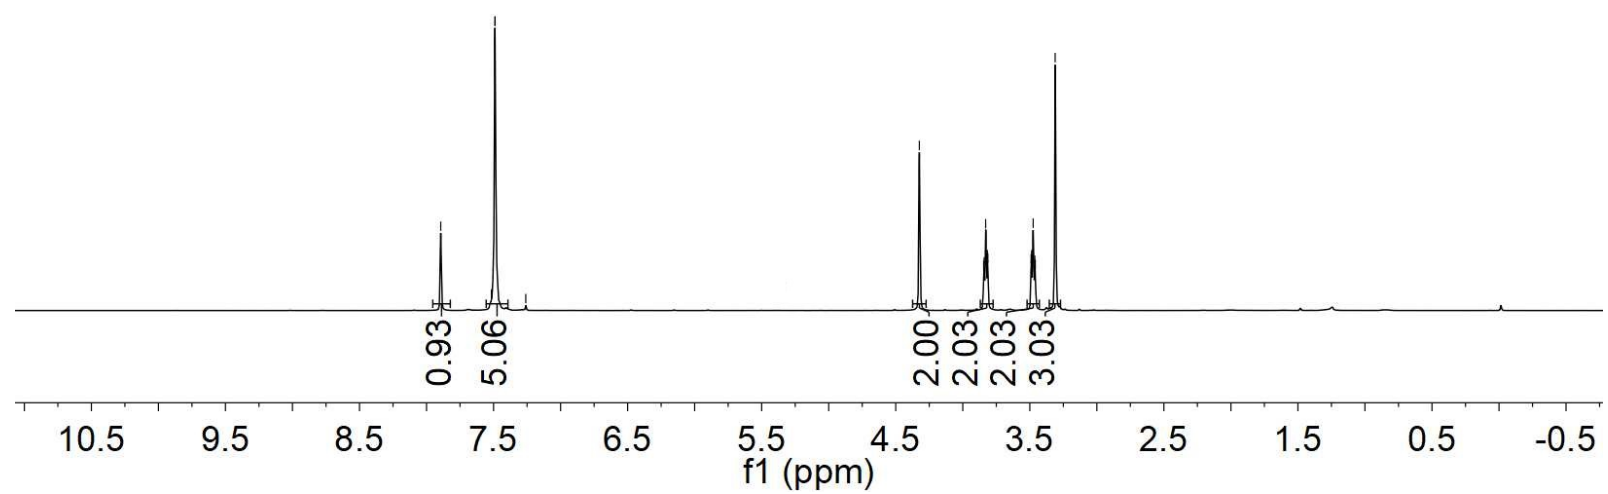

—146.055  
134.335  
131.935  
130.789  
129.277  
129.258  
—111.166  
  
77.318  
77.000  
76.682  
65.663  
58.836  
55.925  
  
—30.560

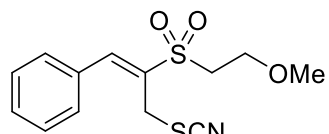

**4m**

<sup>13</sup>C NMR, 100 MHz, CDCl<sub>3</sub>

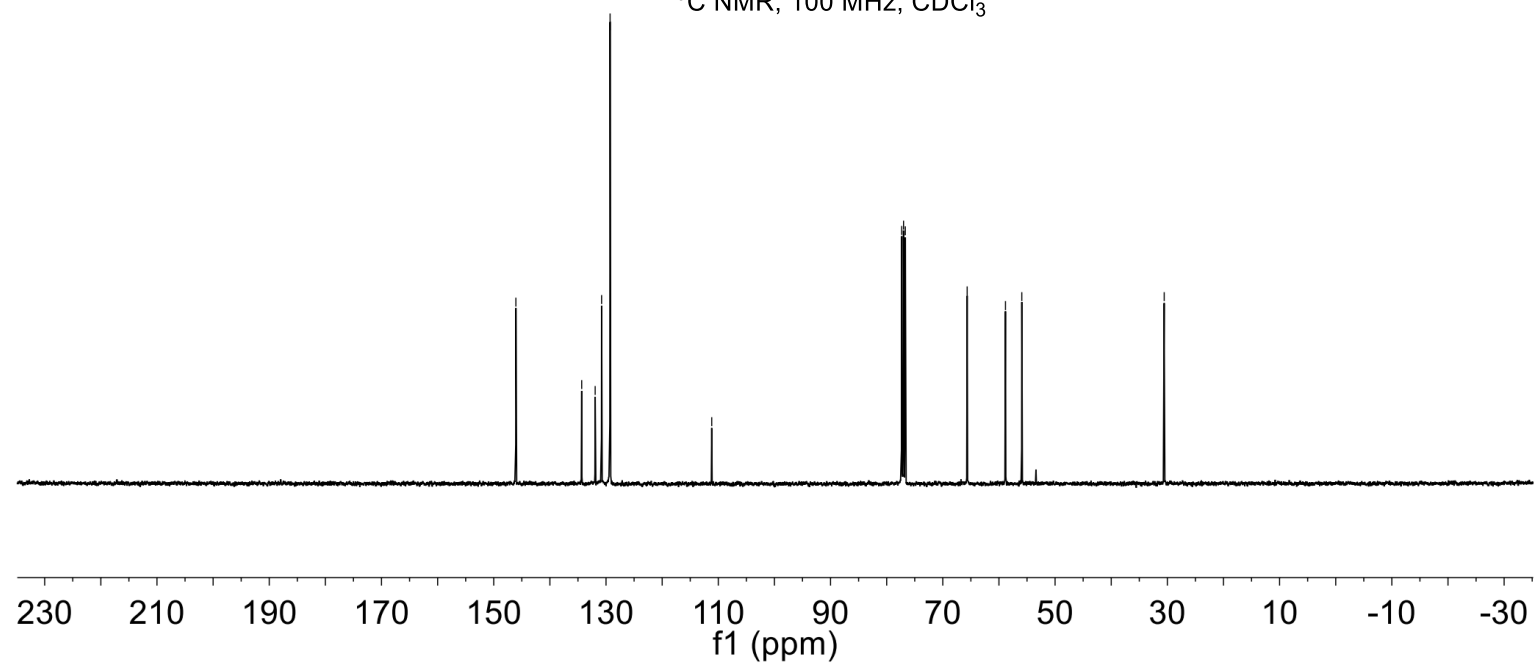

7.879  
7.502  
7.501  
7.493

4.342

2.653  
2.644  
2.633  
2.623  
2.613  
2.612  
2.603  
1.398  
1.388  
1.379  
1.369  
1.215  
1.207  
1.197  
1.188  
1.187  
1.179

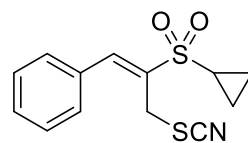

**4n**

<sup>1</sup>H NMR, 400 MHz, CDCl<sub>3</sub>

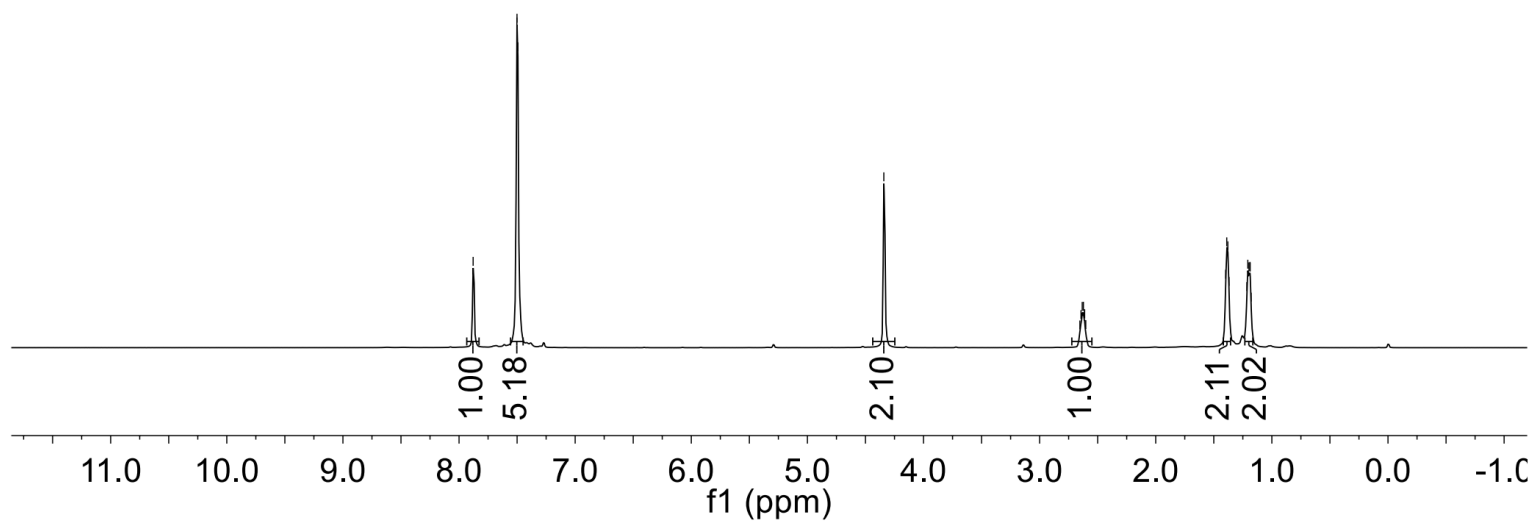

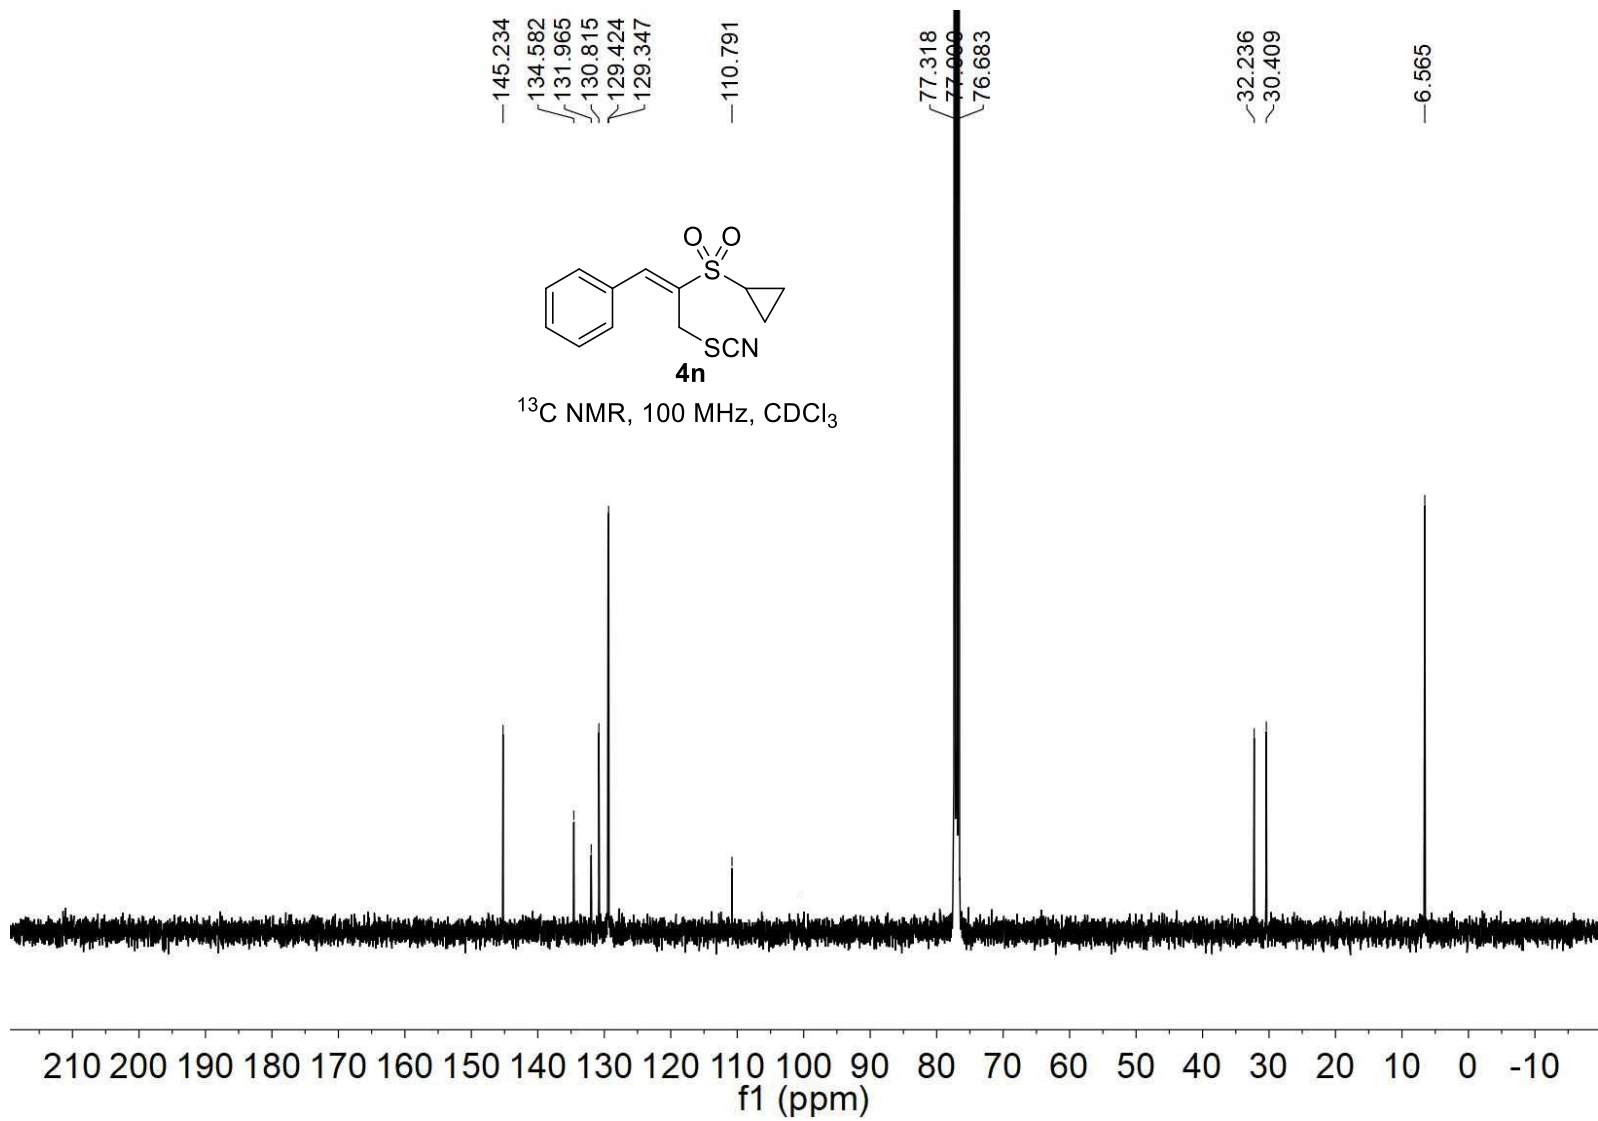

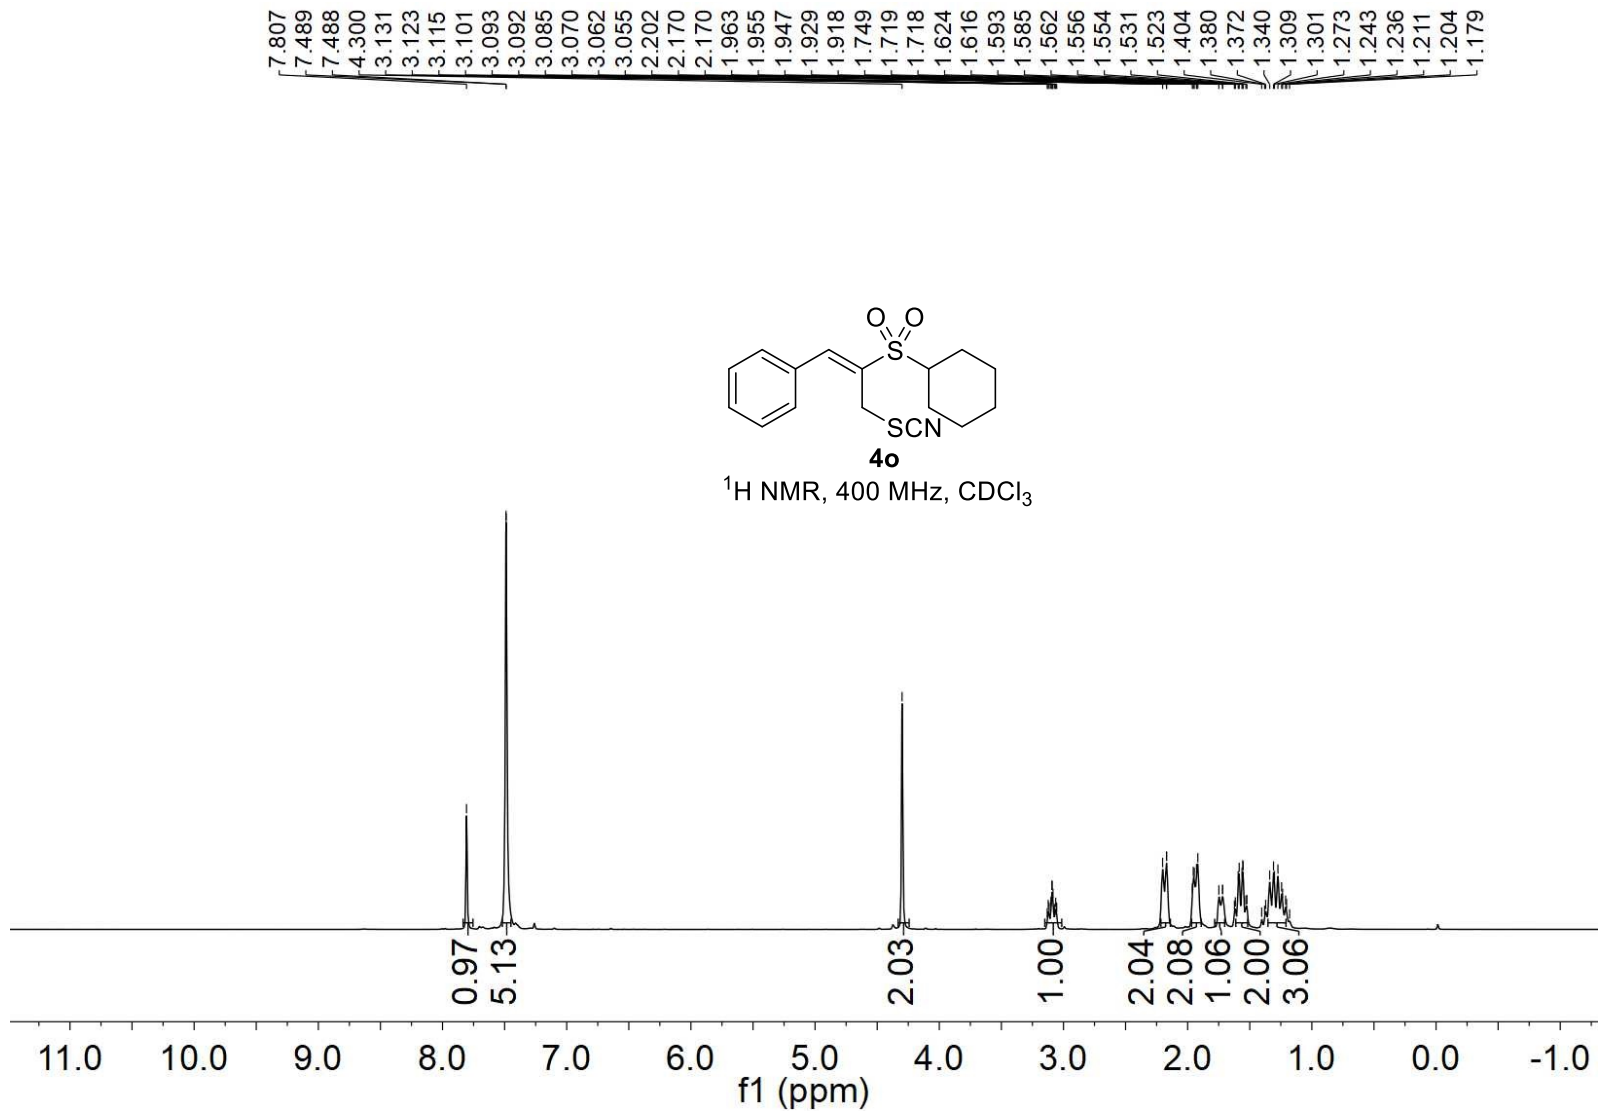

—147.376  
131.864  
131.591  
130.765  
129.334  
129.208  
—110.781  
77.318  
77.000  
76.681  
—62.570  
30.614  
24.949  
24.902

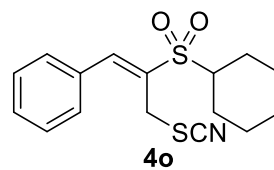

<sup>13</sup>C NMR, 100 MHz, CDCl<sub>3</sub>

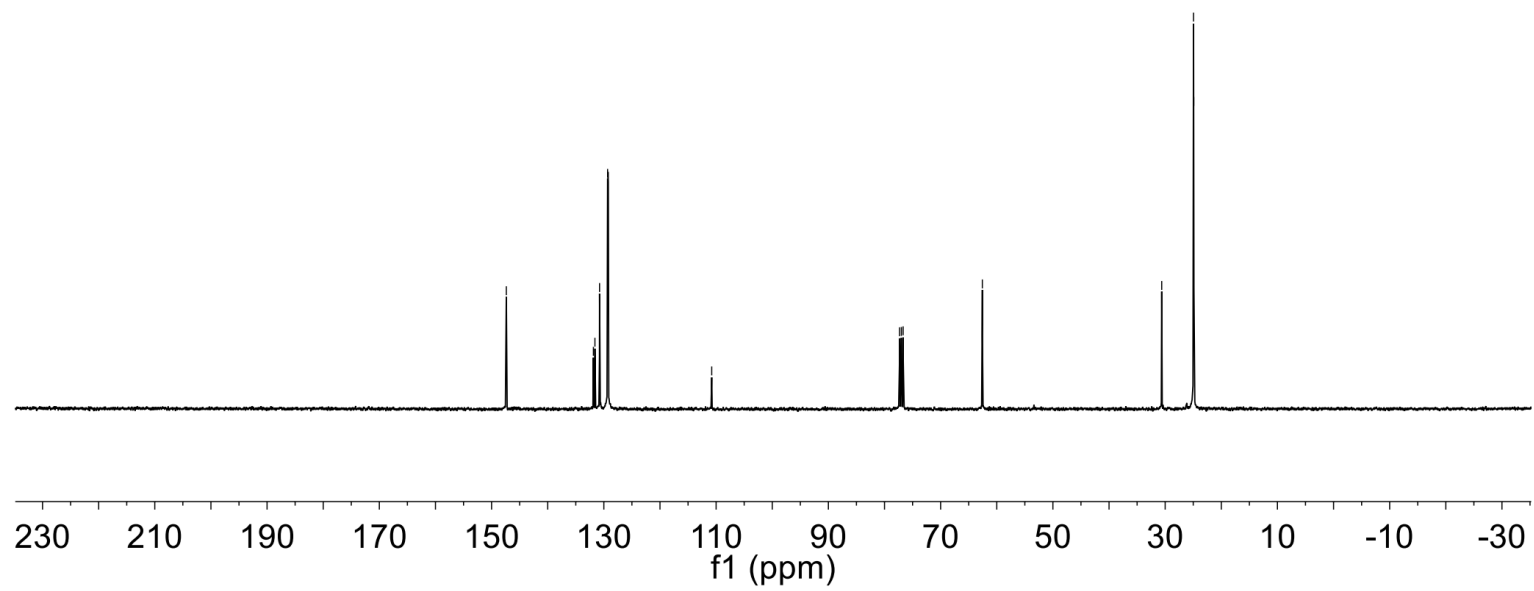

8.084  
7.826  
7.826  
7.815  
7.503  
7.499  
7.490  
7.486  
7.485  
7.478  
7.473  
7.465  
7.458  
7.452  
7.446  
7.440  
7.260  
7.232  
7.231  
7.221  
7.210

—3.668

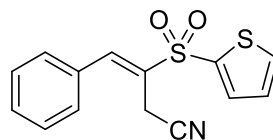

**5a**

$^1\text{H NMR}$ , 400 MHz,  $\text{CDCl}_3$

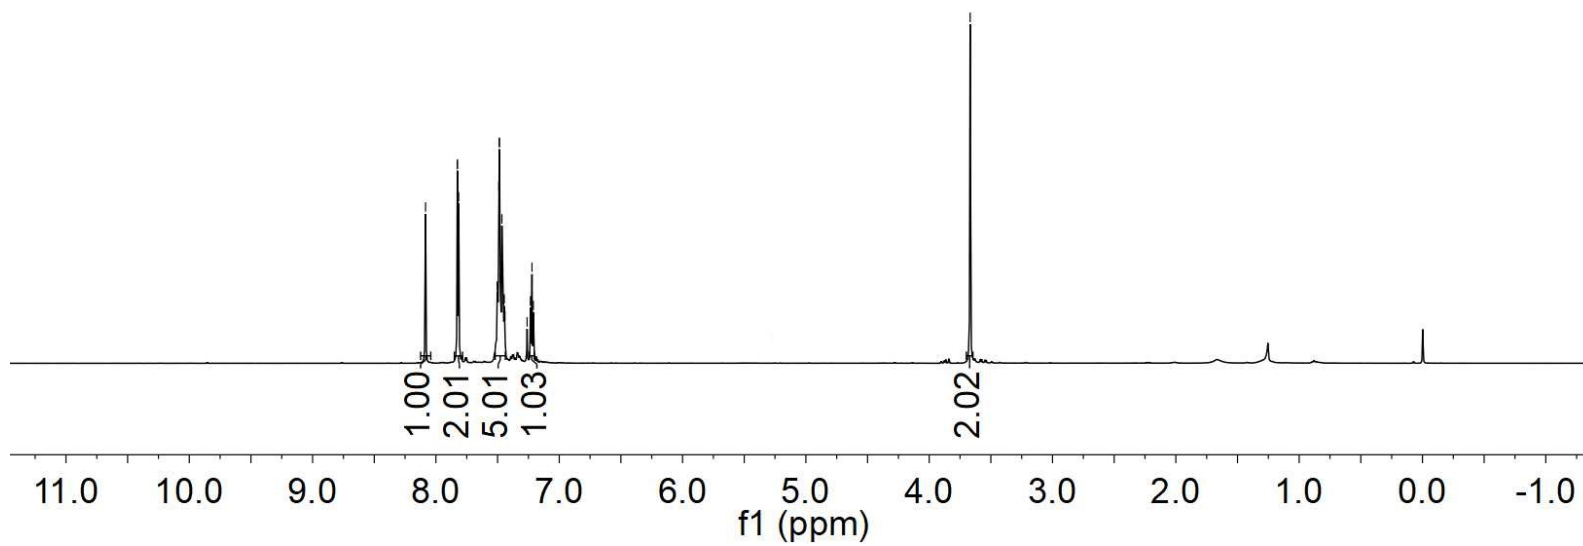

S83

142.359  
139.251  
135.579  
135.301  
131.792  
131.543  
130.832  
129.437  
129.275  
128.443  
115.102

77.318  
77.000  
76.682

16.344

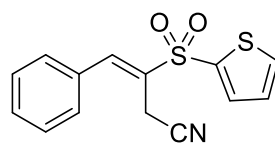

**5a**

<sup>13</sup>C NMR, 100 MHz, CDCl<sub>3</sub>

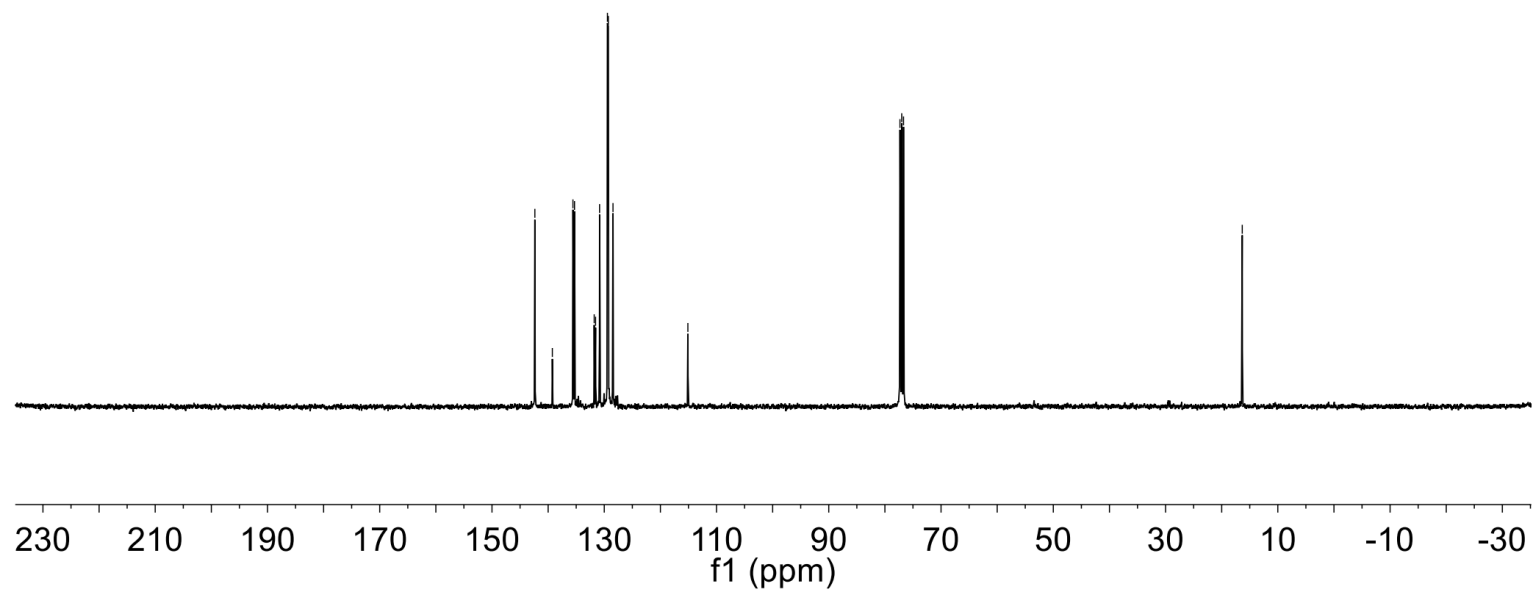

8.030  
7.843  
7.832  
7.822  
7.821  
7.811  
7.492  
7.481  
7.471  
7.465  
7.460  
7.411  
7.410  
7.401  
7.389  
7.380  
7.260  
7.244  
7.233  
7.223  
7.222  
7.212

3.641

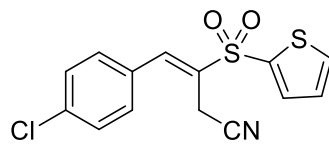

**5b**

<sup>1</sup>H NMR, 400 MHz, CDCl<sub>3</sub>

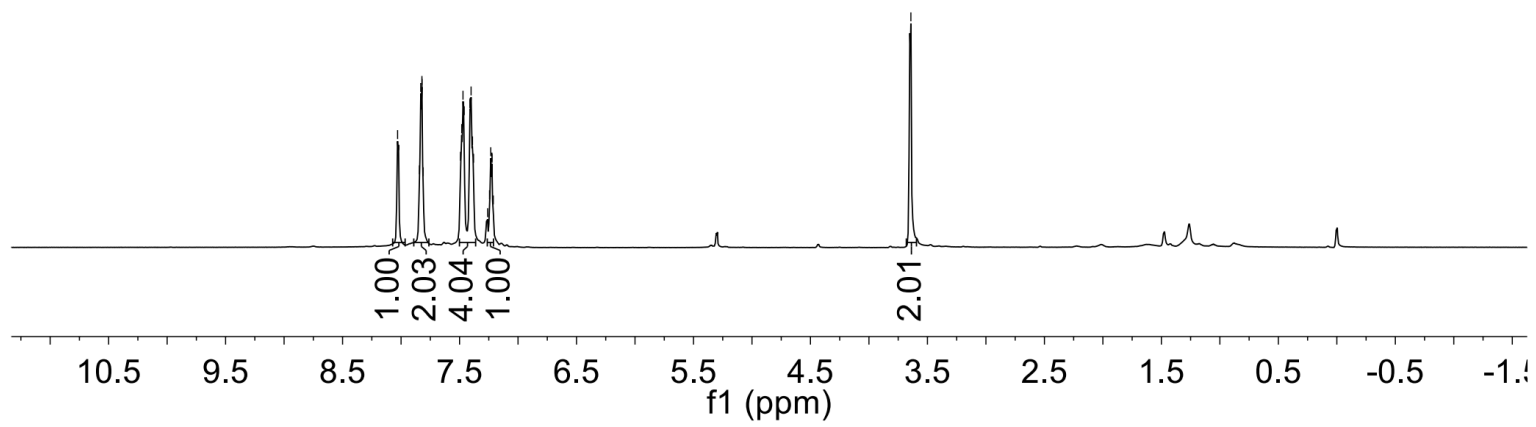

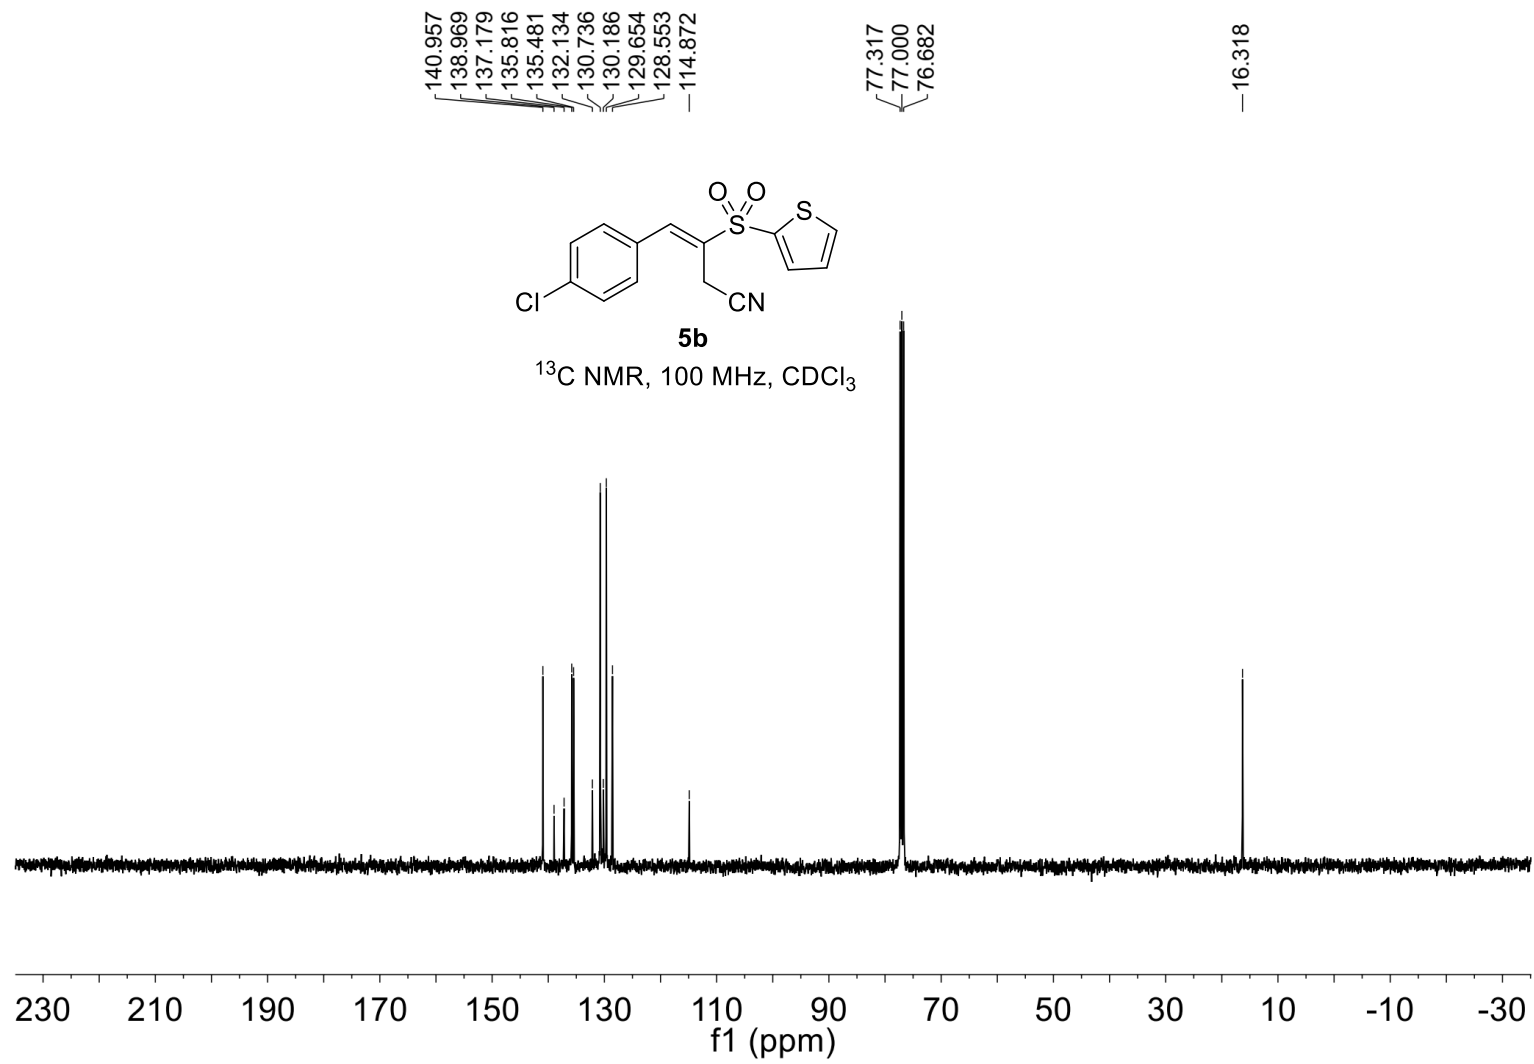

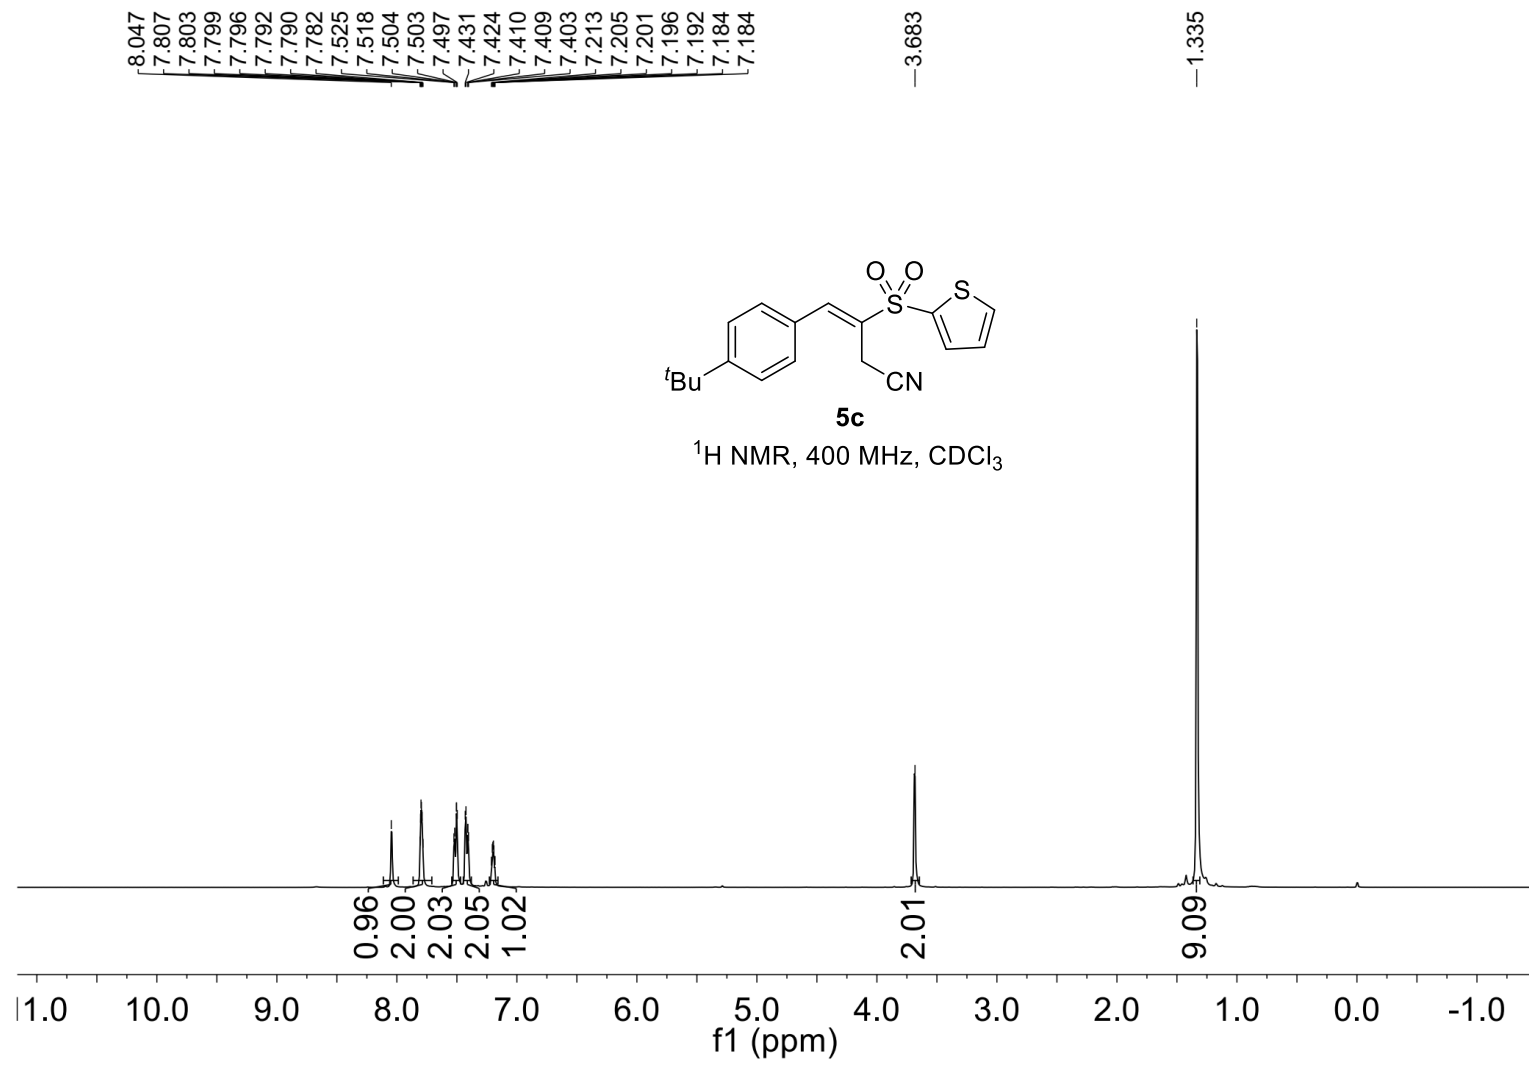

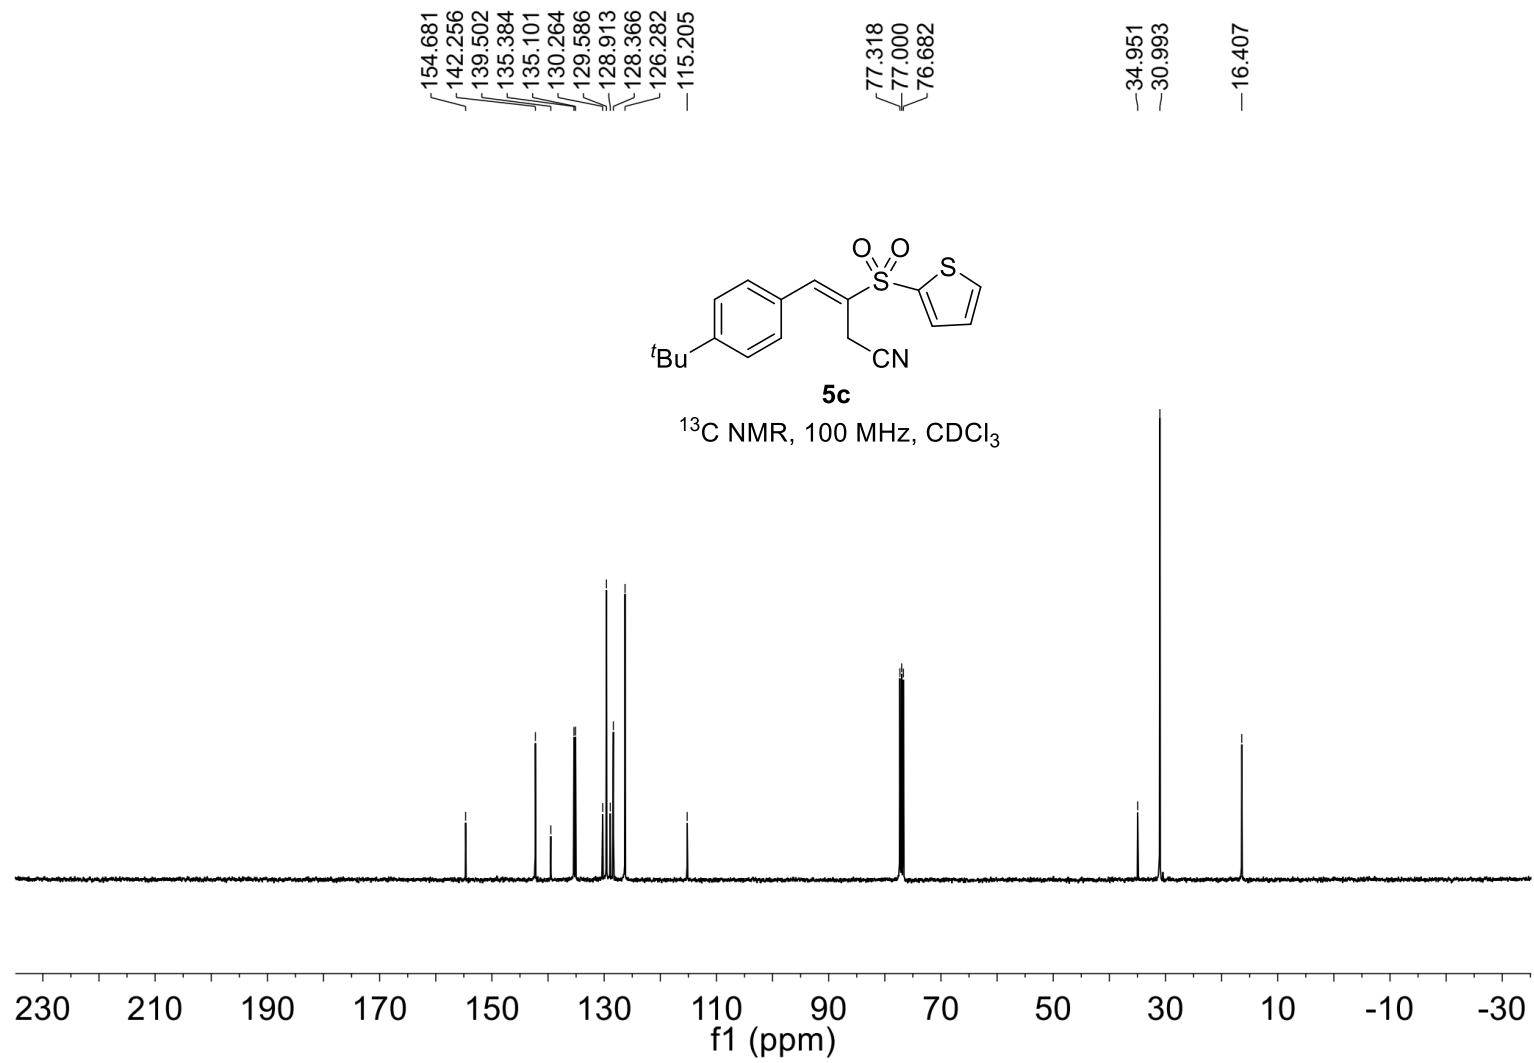

7.588  
7.393  
7.392  
7.377  
7.376  
7.304  
7.288  
7.284  
7.260  
7.241  
7.225  
7.212  
7.208  
7.160  
7.157  
7.153  
7.151  
7.147  
7.147  
7.143  
7.079  
7.063  
7.059  
6.891  
6.880  
6.870  
6.867

3.613

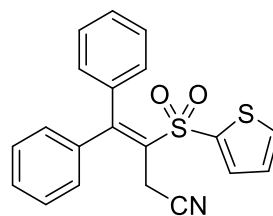

**5d**

<sup>1</sup>H NMR, 400 MHz, CDCl<sub>3</sub>

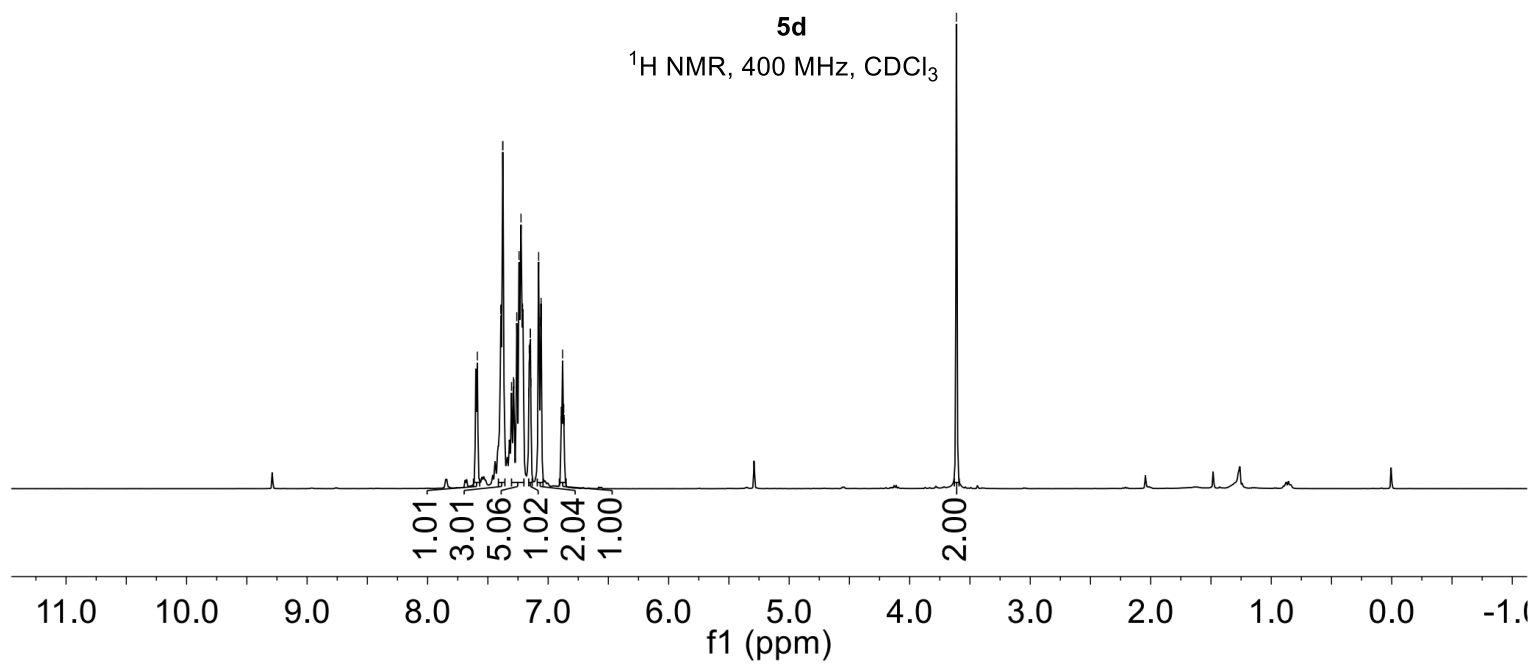

157.853  
140.511  
139.462  
137.361  
135.004  
134.503  
132.644  
129.511  
129.038  
128.920  
128.805  
127.844  
127.629  
127.203  
117.009

77.318  
77.000  
76.682

20.739

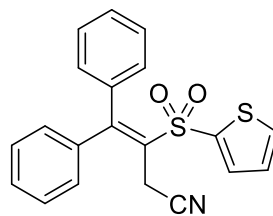

**5d**

<sup>13</sup>C NMR, 100 MHz, CDCl<sub>3</sub>

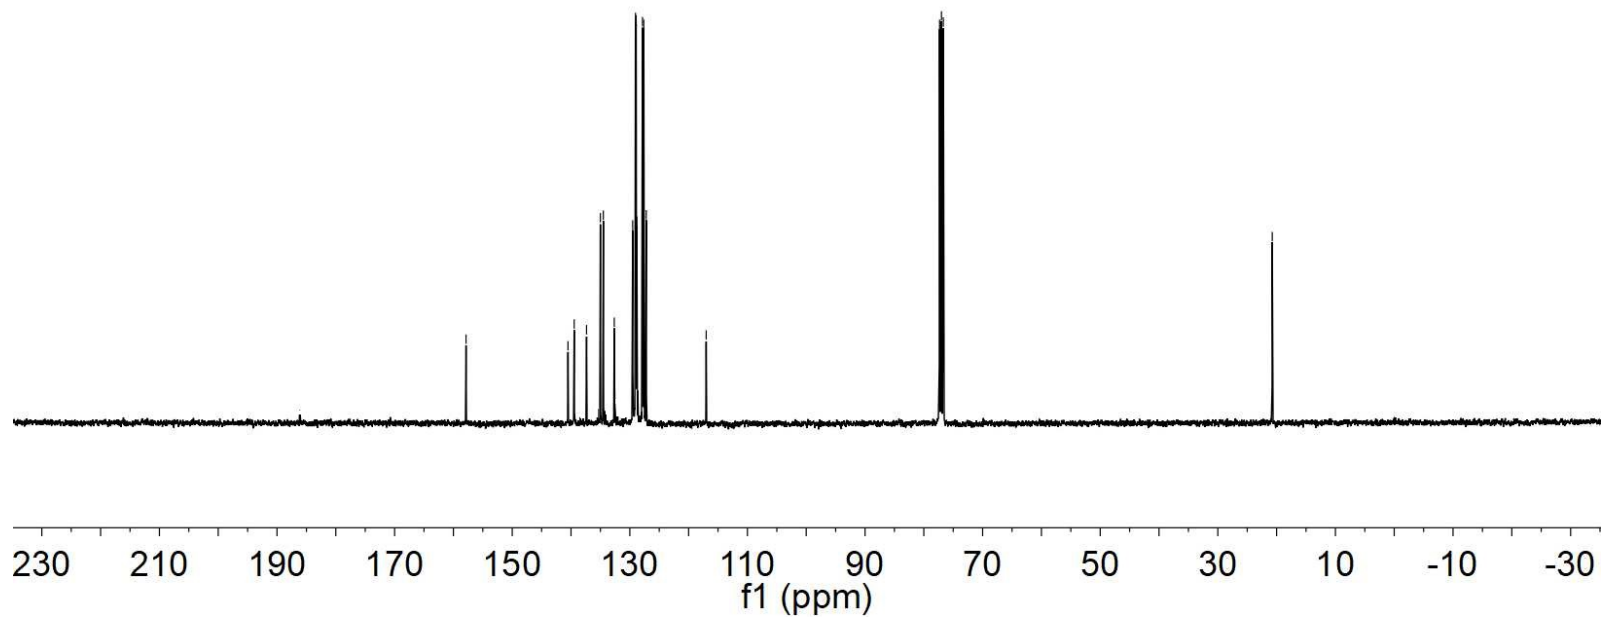

S90

7.774  
7.761  
7.718  
7.709  
7.260  
7.182  
7.171  
7.159  
7.026  
7.000

3.466  
2.387  
2.370  
2.361  
2.360  
2.344  
2.335  
2.334  
2.324  
2.308  
2.298

1.815  
1.807  
1.797  
1.776  
1.739  
1.725  
1.707  
1.344  
1.315  
1.294  
1.275  
1.253  
1.252  
1.241  
1.219  
1.210

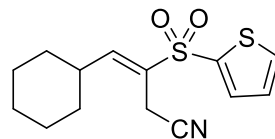

**5e**

<sup>1</sup>H NMR, 400 MHz, CDCl<sub>3</sub>

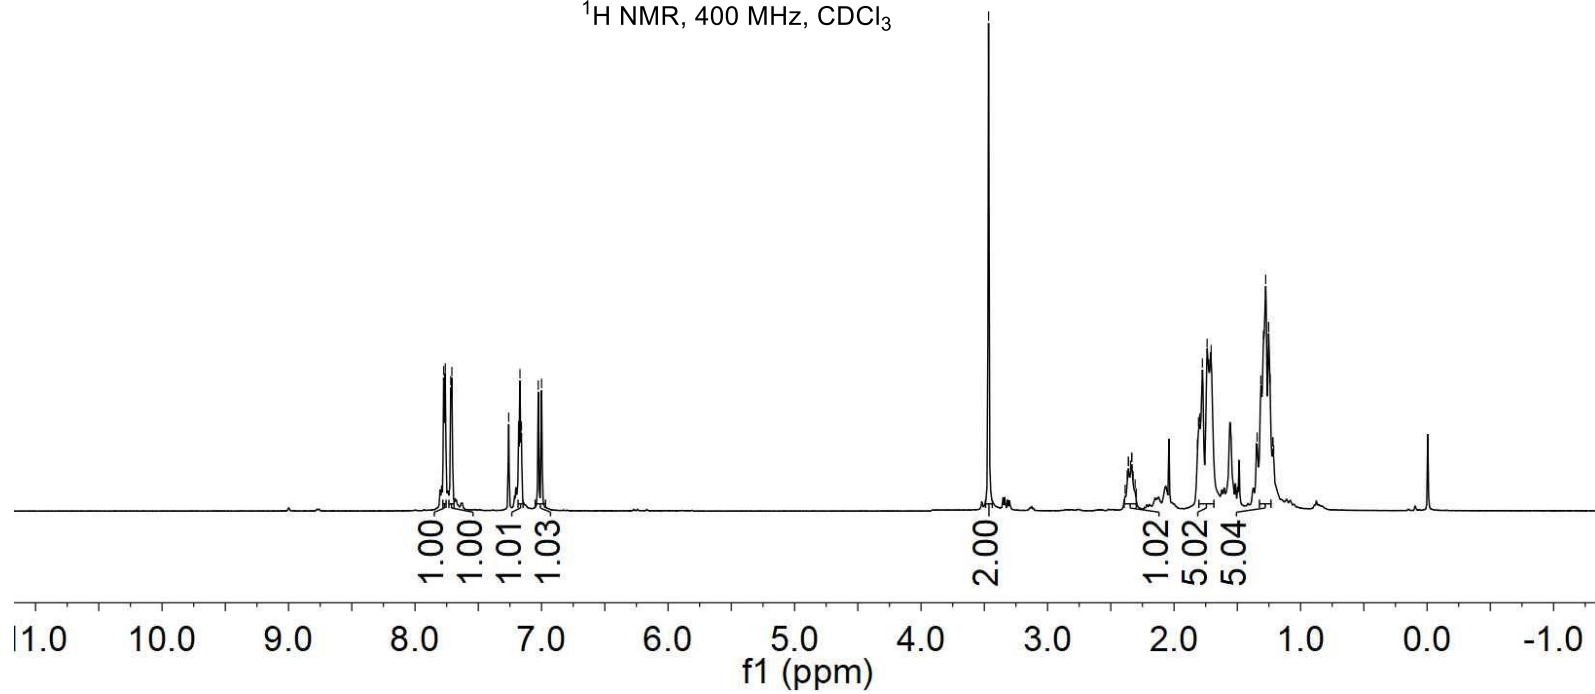

150.981  
139.558  
135.191  
134.887  
130.194  
128.261  
115.055  
77.318  
77.000  
76.682  
38.603  
30.987  
25.367  
24.989  
14.591

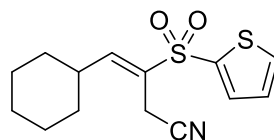

**5e**

<sup>13</sup>C NMR, 100 MHz, CDCl<sub>3</sub>

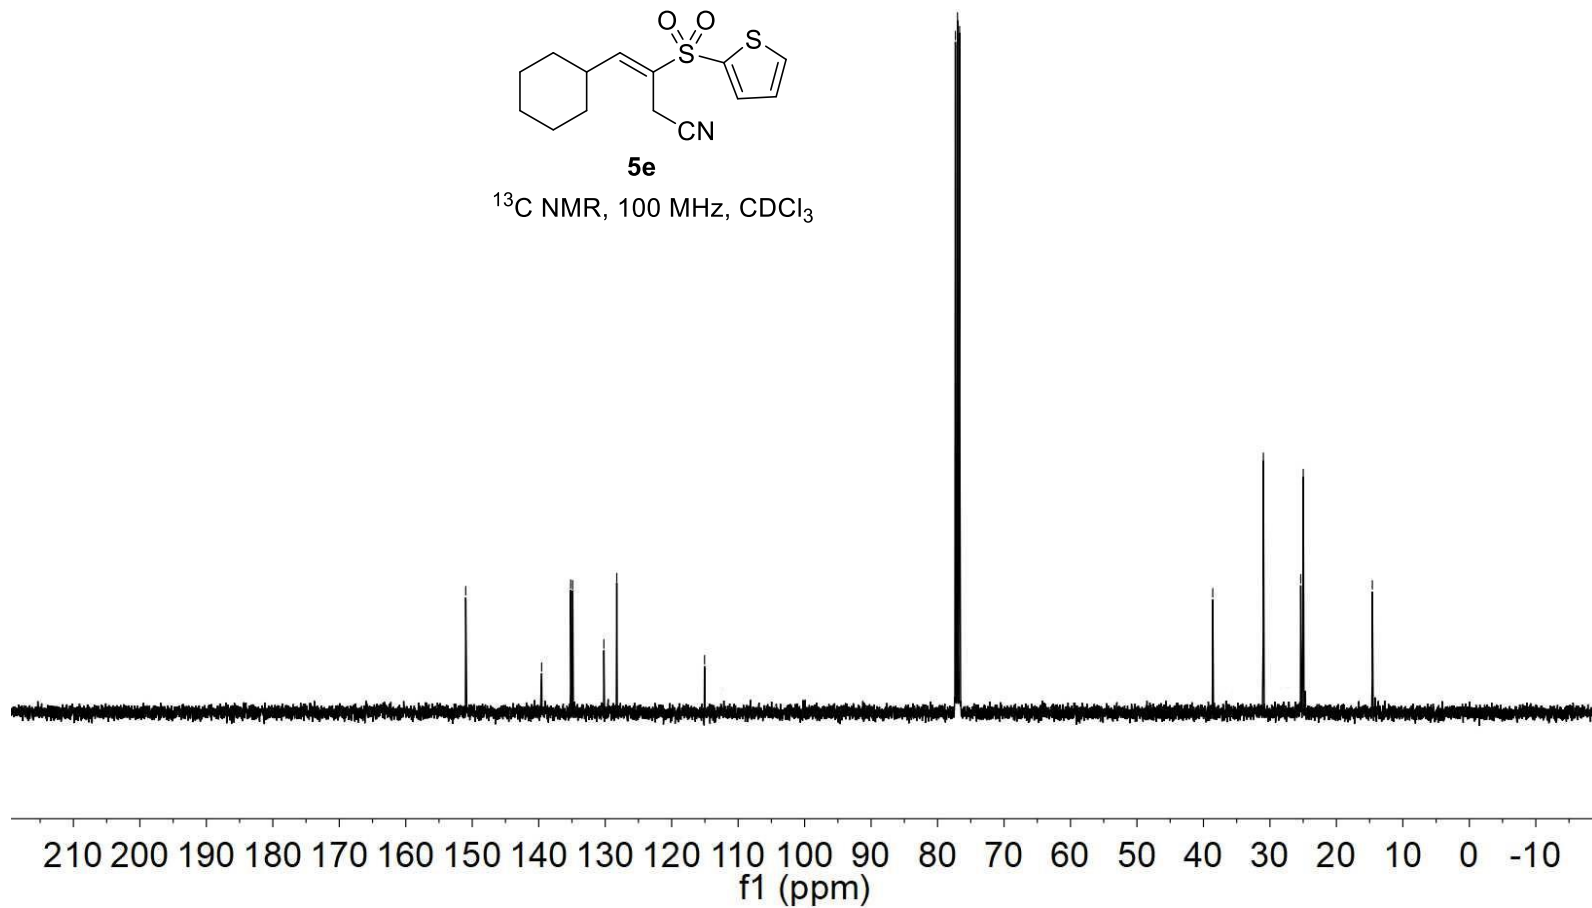

8.094  
7.998  
7.987  
7.979  
7.969  
7.967  
7.711  
7.704  
7.693  
7.689  
7.686  
7.674  
7.638  
7.627  
7.619  
7.608  
7.607  
7.590  
7.479  
7.467  
7.454  
7.444  
7.433  
7.421  
7.260

3.589

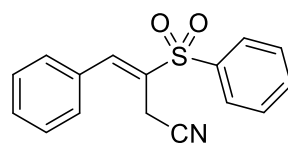

**5f**

<sup>1</sup>H NMR, 400 MHz, CDCl<sub>3</sub>

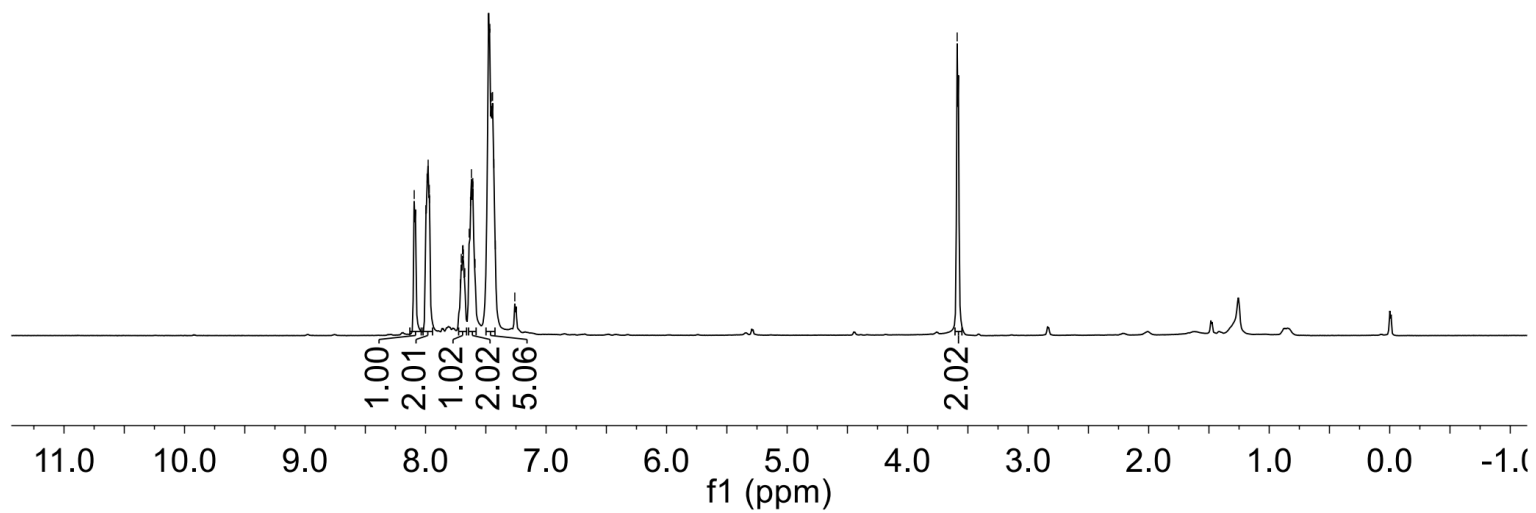

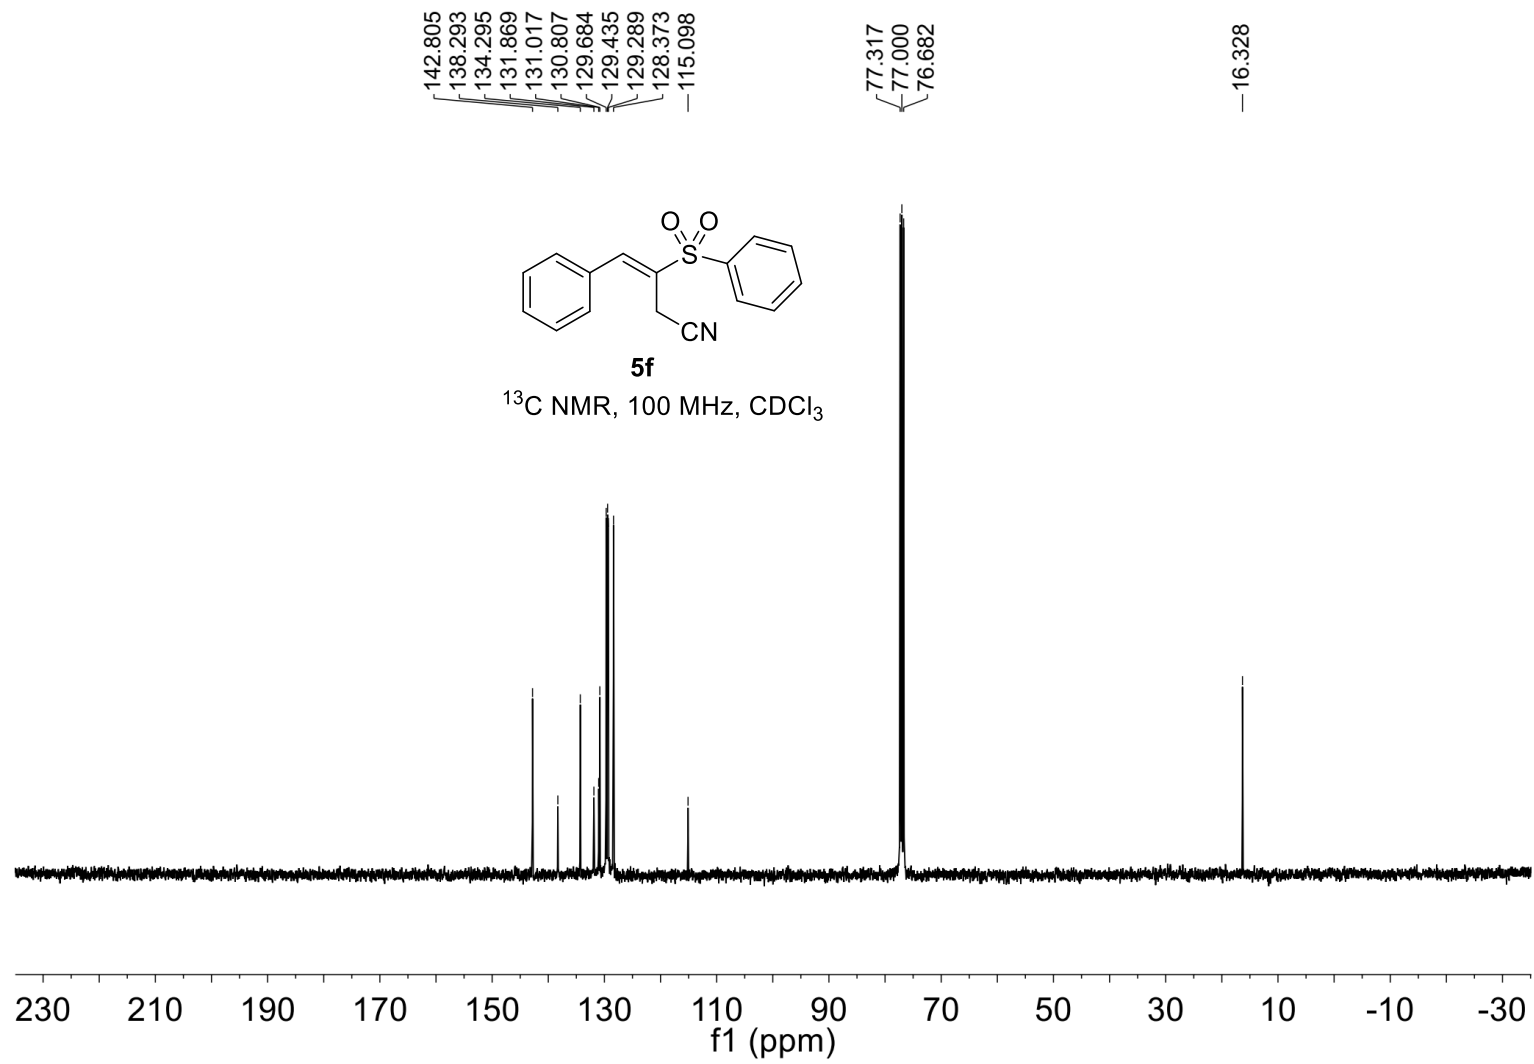

8.617  
8.156  
8.044  
8.038  
8.031  
8.022  
8.016  
7.934  
7.914  
7.888  
7.883  
7.878  
7.867  
7.861  
7.856  
7.701  
7.697  
7.692  
7.684  
7.679  
7.665  
7.659  
7.654  
7.649  
7.636  
7.621  
7.617  
7.612  
7.469  
7.464  
7.463  
7.260  
3.614

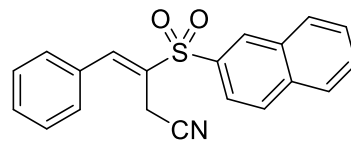

**5g**

<sup>1</sup>H NMR, 400 MHz, CDCl<sub>3</sub>

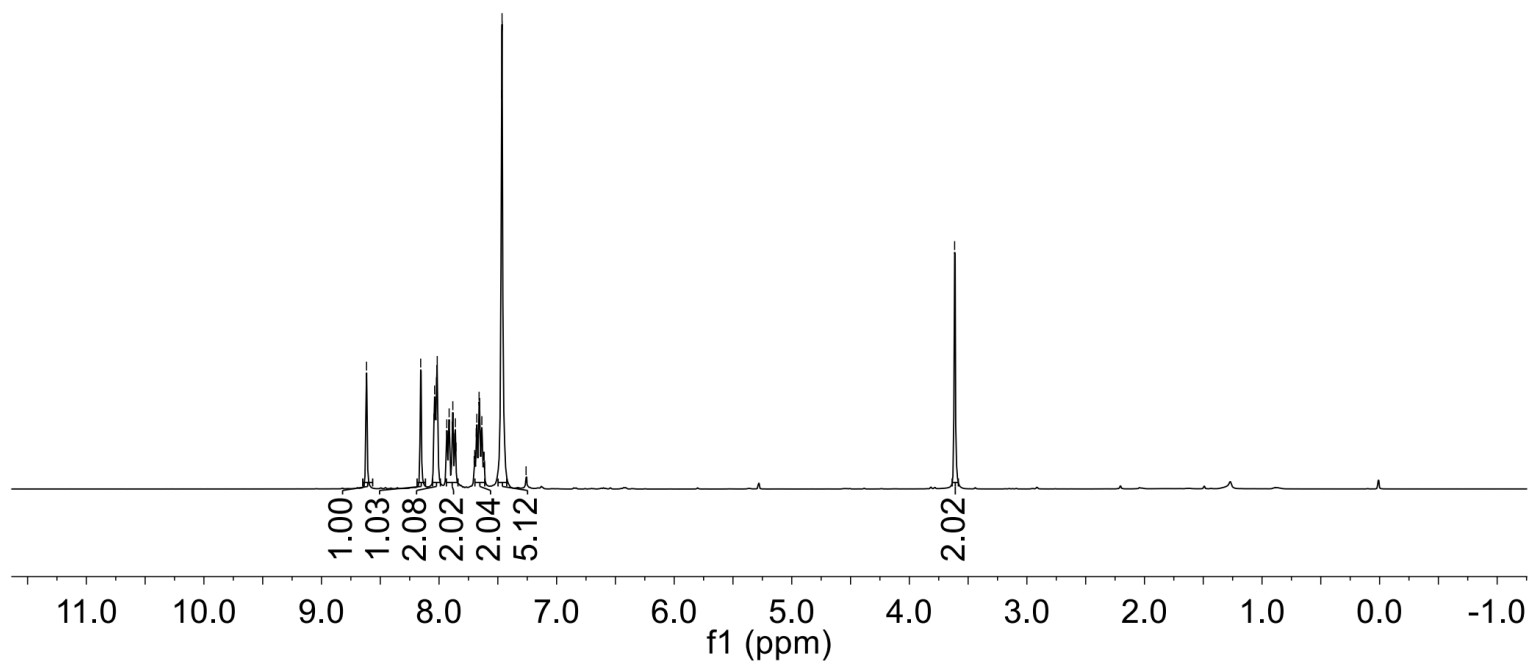

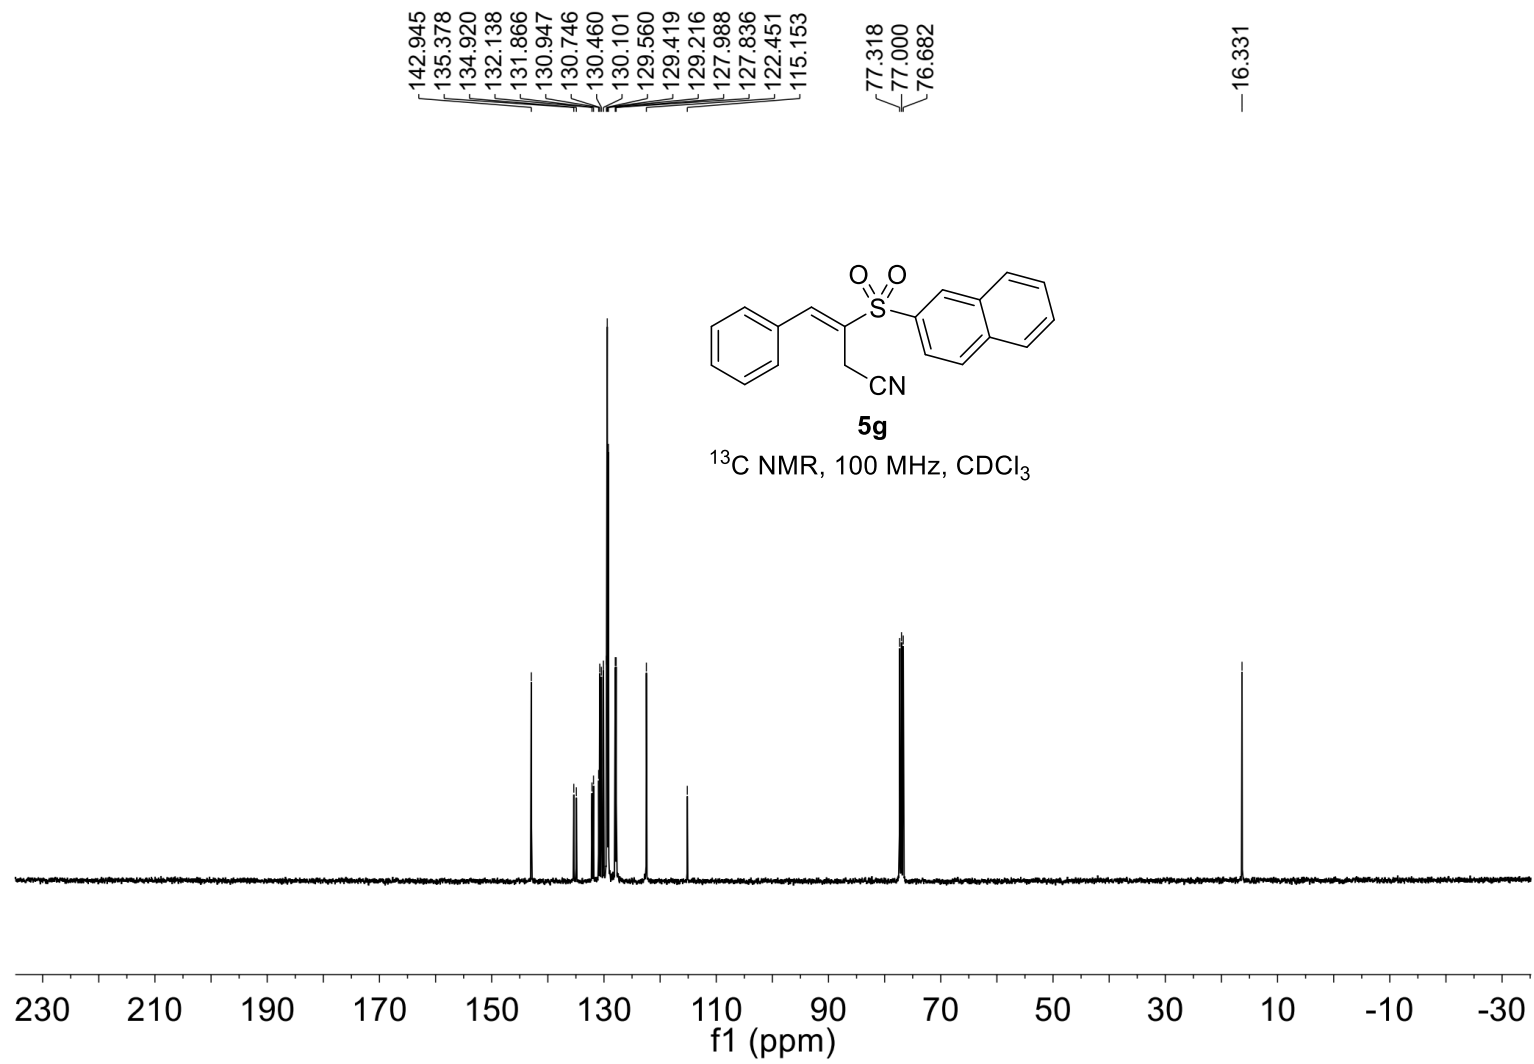

9.181  
8.901  
8.284  
8.279  
8.272  
8.259  
8.253  
8.247  
8.135  
8.128  
7.576  
7.570  
7.564  
7.556  
7.544  
7.536  
7.502  
7.493  
7.486  
7.479  
7.450  
7.442  
7.432  
7.425  
7.419

3.642

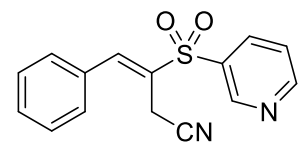

**5h**

<sup>1</sup>H NMR, 400 MHz, CDCl<sub>3</sub>

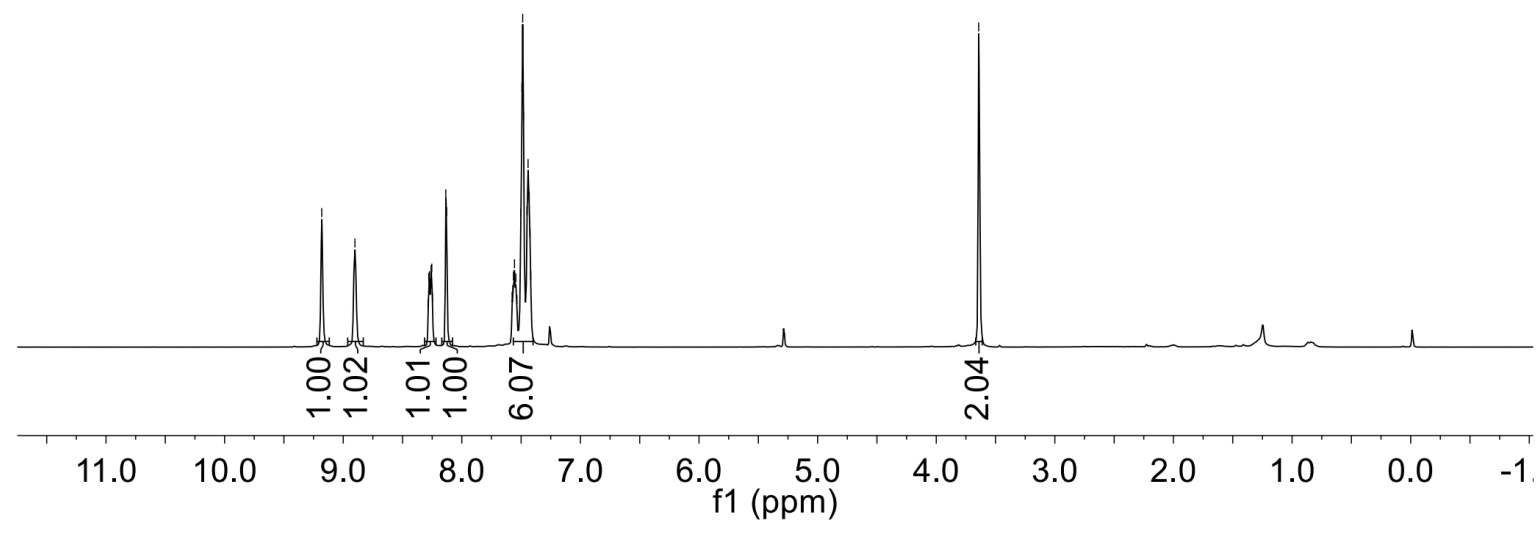

154.578  
149.193  
144.321  
136.026  
135.371  
131.504  
131.157  
130.476  
129.486  
129.370  
124.120  
114.943

77.317  
77.000  
76.682

16.328

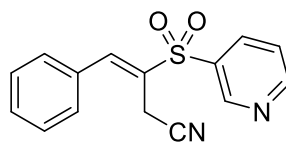

**5h**

<sup>13</sup>C NMR, 100 MHz, CDCl<sub>3</sub>

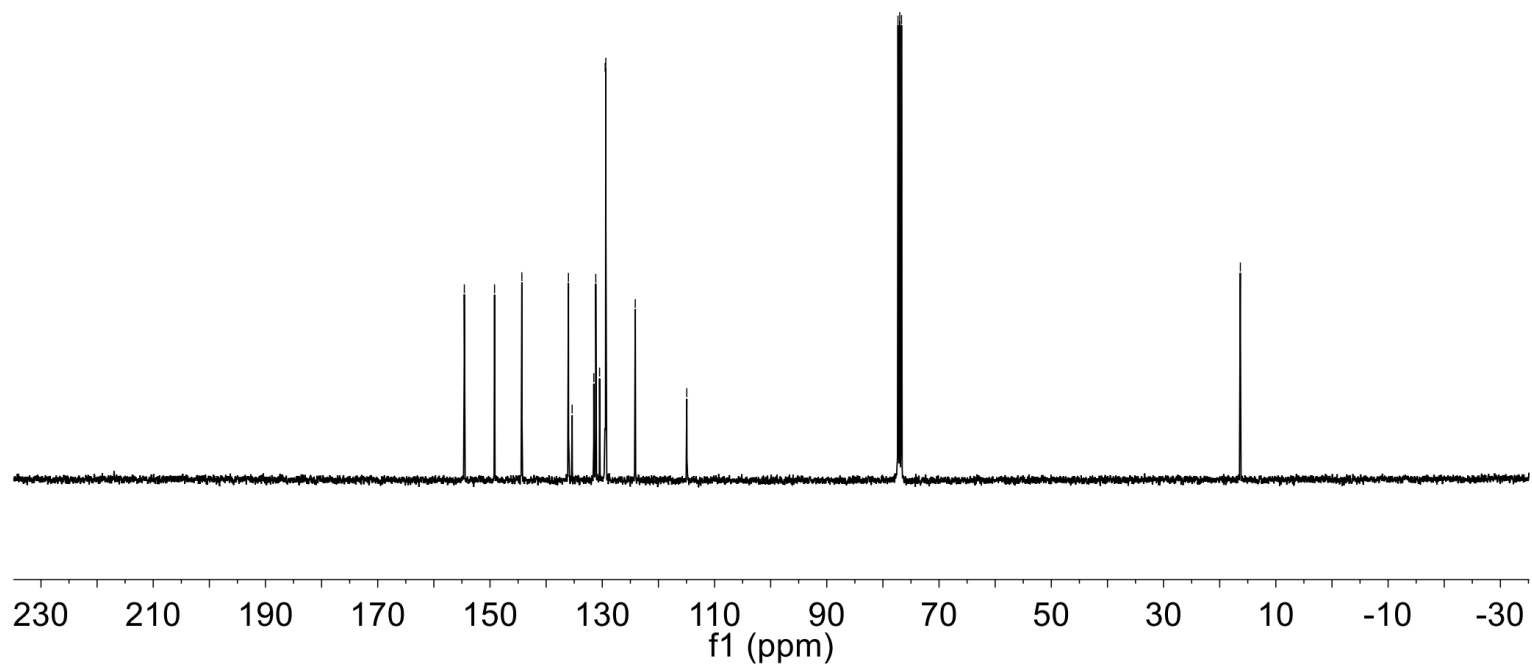

7.889  
7.526  
7.510  
7.471  
7.463  
7.450  
7.260

3.744  
3.276  
3.258  
3.239  
3.221

1.452  
1.434  
1.416

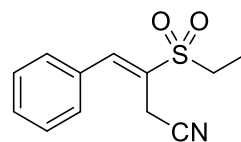

**5i**

<sup>1</sup>H NMR, 400 MHz, CDCl<sub>3</sub>

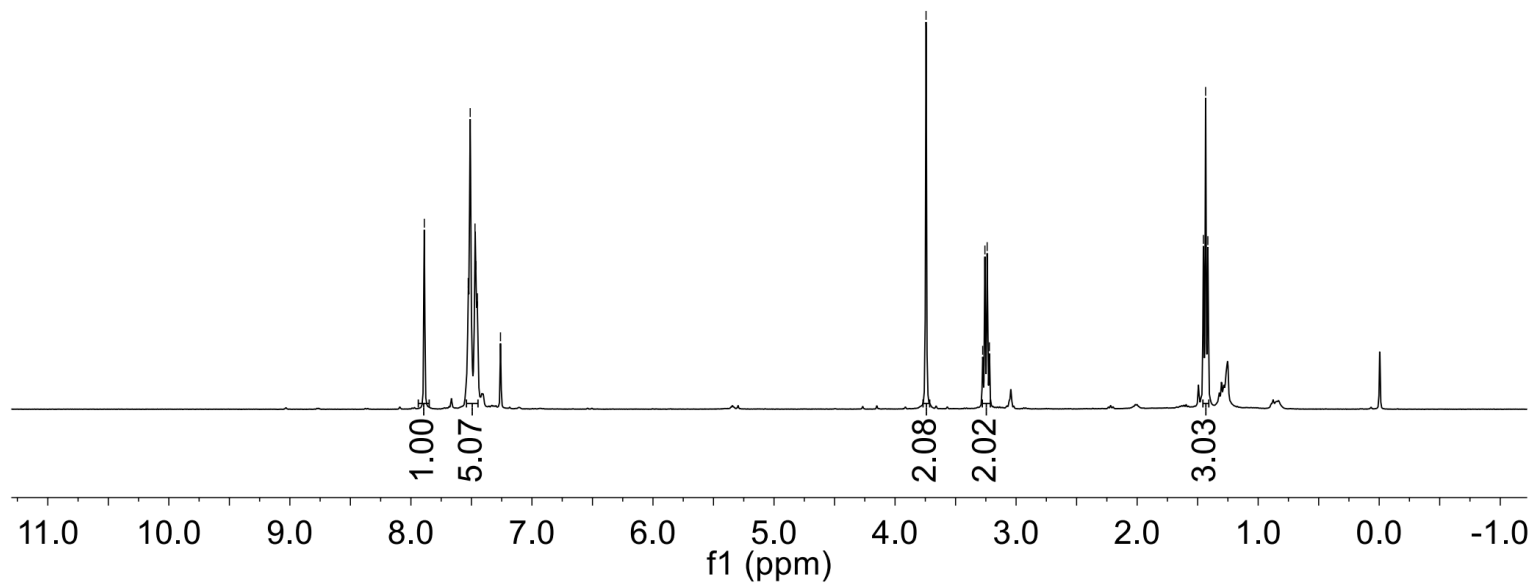

145.598  
131.868  
130.934  
129.385  
129.351  
128.692  
115.906

77.318  
77.000  
76.683

49.173

16.536  
7.109

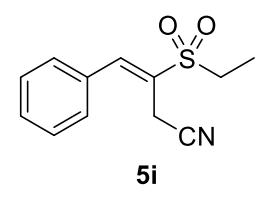

<sup>13</sup>C NMR, 100 MHz, CDCl<sub>3</sub>

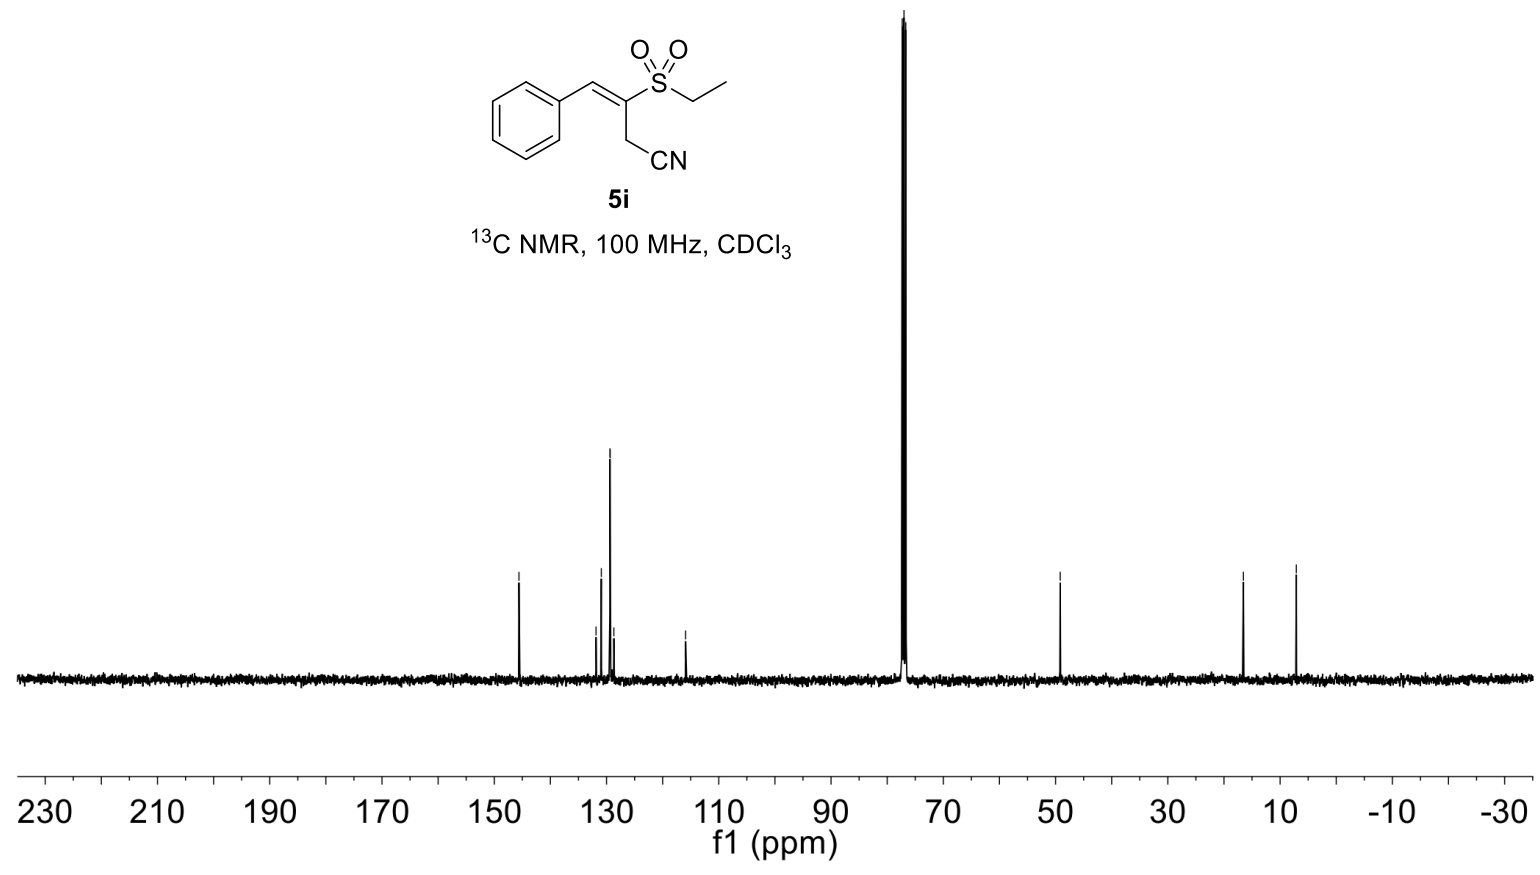

8.055  
7.795  
7.791  
7.785  
7.782  
7.775  
7.775  
7.772  
7.763  
7.760  
7.568  
7.562  
7.557  
7.548  
7.544  
7.543  
7.496  
7.485  
7.480  
7.480  
7.472  
7.467  
7.467  
7.460  
7.260  
7.193  
7.183  
7.182  
7.180  
7.171  
4.160

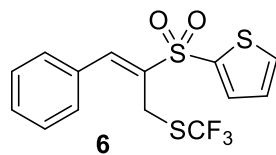

<sup>1</sup>H NMR, 400 MHz, CDCl<sub>3</sub>

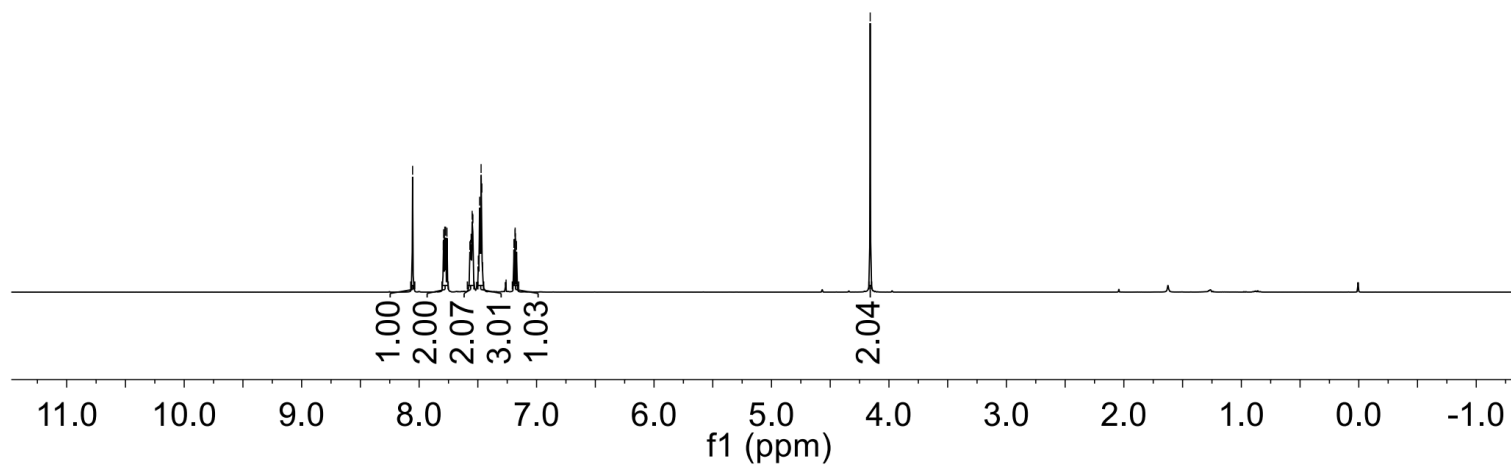

142.813  
140.114  
135.093  
134.976  
134.644  
132.150  
131.586  
130.754  
129.689  
129.147  
128.528  
128.129  
125.468

77.317  
77.000  
76.681

26.197  
26.169

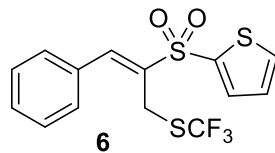

<sup>13</sup>C NMR, 100 MHz, CDCl<sub>3</sub>

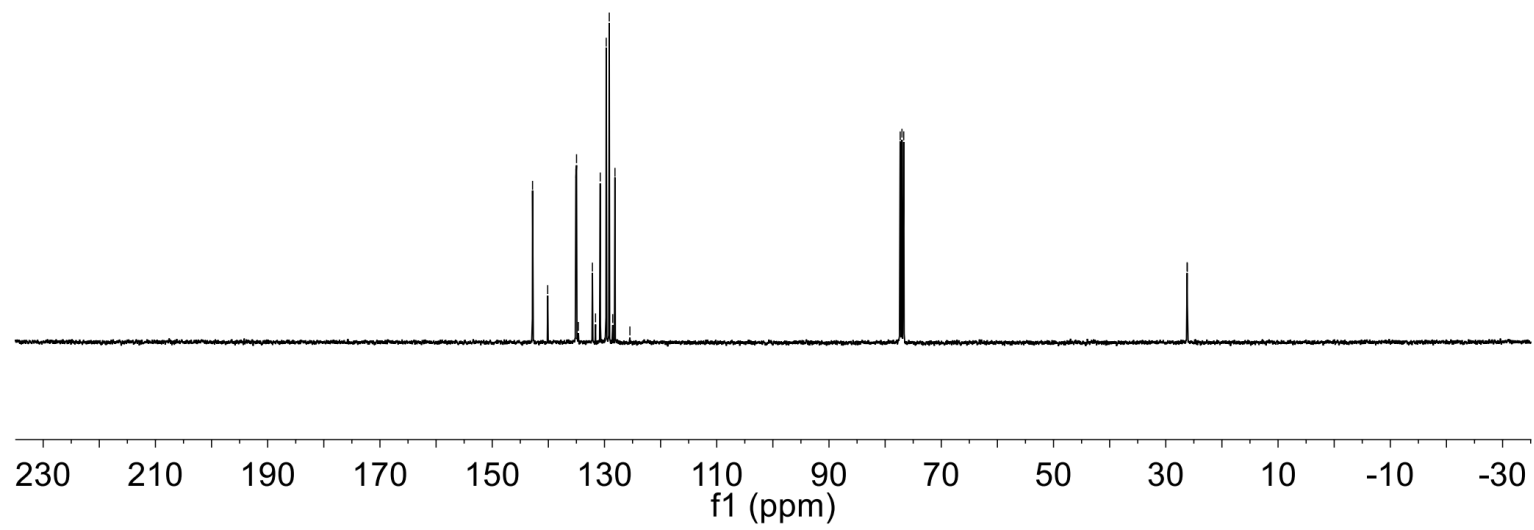

-42.531

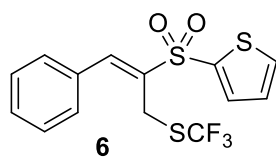

<sup>19</sup>F NMR, 376 MHz, CDCl<sub>3</sub>

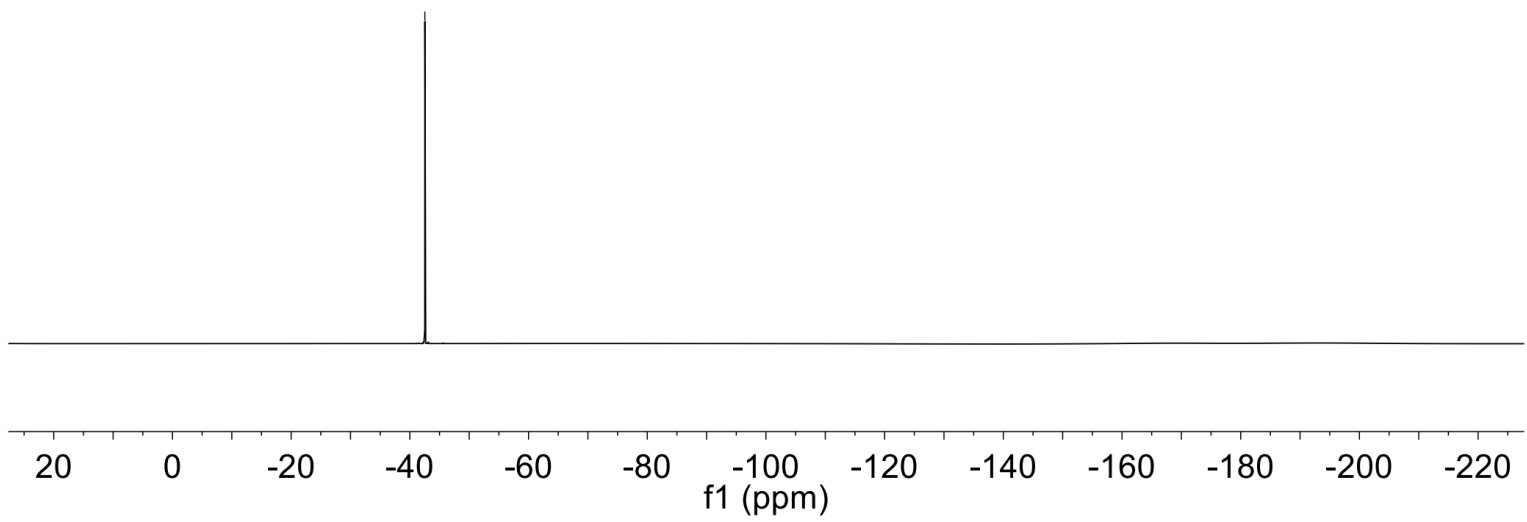

S103

7.809  
7.721  
7.718  
7.712  
7.708  
7.703  
7.694  
7.691  
7.420  
7.414  
7.406  
7.392  
7.387  
7.260  
7.158  
7.148  
7.145  
7.136

-2.232

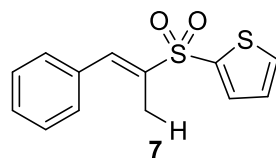

<sup>1</sup>H NMR, 400 MHz, CDCl<sub>3</sub>

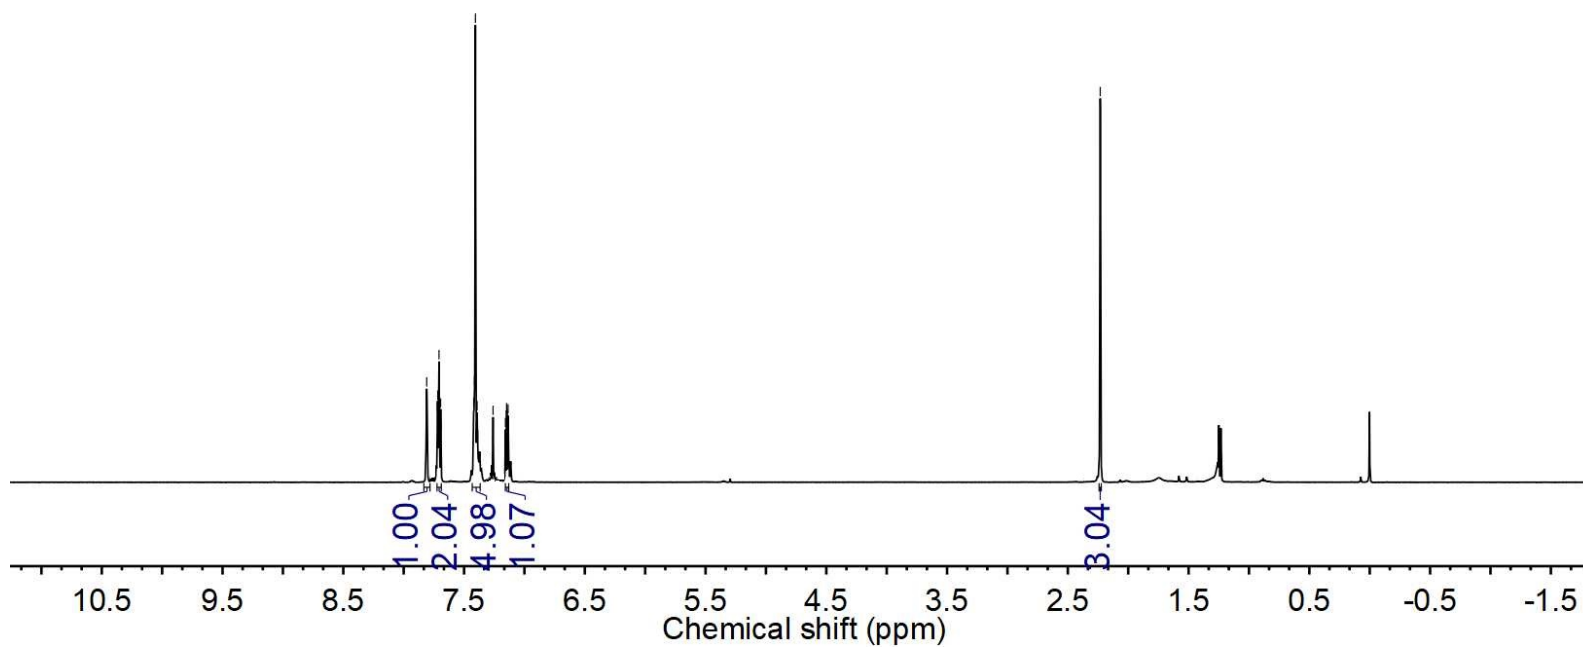

S104

140.567  
137.874  
137.222  
134.058  
133.860  
133.708  
129.622  
129.384  
128.721  
127.798

77.318  
77.000  
76.683

13.163

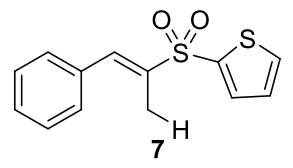

<sup>13</sup>C NMR, 100 MHz, CDCl<sub>3</sub>

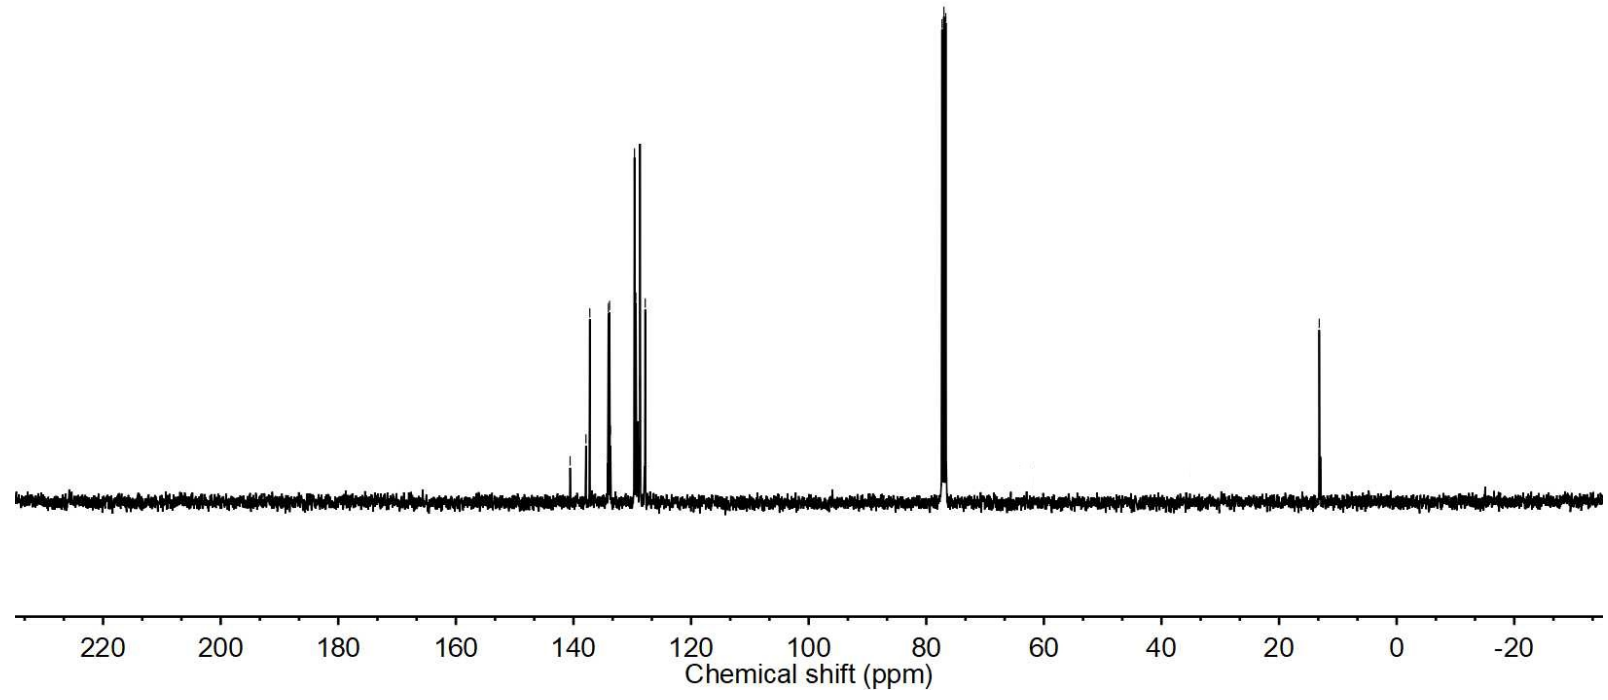

Supplement: d6cc00944a1.pdf [file d6cc00944a1.pdf]
